# Supplementary material for: Examining patterns of multimorbidity, polypharmacy and risk of adverse drug reactions in chronic obstructive pulmonary disease: a cross-sectional UK Biobank study
Source: PubMed Central journal article supplement (PMC5781016; doi:10.1136/bmjopen-2017-018404), 2018-01-14
Supplement: bmjopen-2017-018404.draft_revisions.pdf [file bmjopen-2017-018404.draft_revisions.pdf]

# BMJ Open

BMJ Open is committed to open peer review. As part of this commitment we make the peer review history of every article we publish publicly available.

When an article is published we post the peer reviewers' comments and the authors' responses online. We also post the versions of the paper that were used during peer review. These are the versions that the peer review comments apply to.

The versions of the paper that follow are the versions that were submitted during the peer review process. They are not the versions of record or the final published versions. They should not be cited or distributed as the published version of this manuscript.

BMJ Open is an open access journal and the full, final, typeset and author-corrected version of record of the manuscript is available on our site with no access controls, subscription charges or pay-per-view fees (<http://bmjopen.bmj.com>).

If you have any questions on BMJ Open's open peer review process please email [editorial.bmjopen@bmj.com](mailto:editorial.bmjopen@bmj.com)

# BMJ Open

## Examining Patterns of Multimorbidity, Polypharmacy and Risk of Adverse Drug Reactions in Chronic Obstructive Pulmonary Disease: A Cross-Sectional UK Biobank Study

|                                 |                                                                                                                                                                                                                                                                                                                                                                                                                                                                  |
|---------------------------------|------------------------------------------------------------------------------------------------------------------------------------------------------------------------------------------------------------------------------------------------------------------------------------------------------------------------------------------------------------------------------------------------------------------------------------------------------------------|
| Journal:                        | <i>BMJ Open</i>                                                                                                                                                                                                                                                                                                                                                                                                                                                  |
| Manuscript ID                   | bmjopen-2017-018404                                                                                                                                                                                                                                                                                                                                                                                                                                              |
| Article Type:                   | Research                                                                                                                                                                                                                                                                                                                                                                                                                                                         |
| Date Submitted by the Author:   | 27-Jun-2017                                                                                                                                                                                                                                                                                                                                                                                                                                                      |
| Complete List of Authors:       | Hanlon, Peter; University of Glasgow Institute of Health and Wellbeing<br>Nicholl, Barbara; University of Glasgow, General Practice and Primary Care<br>Jani, Bhautesh; University of Glasgow<br>McQueenie, Ross; University of Glasgow, GPPC, School of Medicine,<br>Dentistry and Nursing, MVLS<br>Lee, Duncan; University of Glasgow<br>Gallacher, Katie I; University of Glasgow,<br>Mair, Frances; University of Glasgow, General Practice and Primary Care |
| <b>Primary Subject Heading</b>: | Respiratory medicine                                                                                                                                                                                                                                                                                                                                                                                                                                             |
| Secondary Subject Heading:      | General practice / Family practice                                                                                                                                                                                                                                                                                                                                                                                                                               |
| Keywords:                       | Multimorbidity, Polypharmacy, Chronic airways disease < THORACIC MEDICINE, Adverse events < THERAPEUTICS                                                                                                                                                                                                                                                                                                                                                         |
|                                 |                                                                                                                                                                                                                                                                                                                                                                                                                                                                  |

SCHOLARONE™  
Manuscripts

only

1  
2  
3 1 **Examining Patterns of Multimorbidity, Polypharmacy and Risk of Adverse Drug Reactions in**

4  
5 2 **Chronic Obstructive Pulmonary Disease: A Cross-Sectional UK Biobank Study**

6  
7  
8 3

9  
10 4 **Corresponding author**

11  
12  
13 5 Professor Frances Mair

14  
15  
16 6 General Practice and Primary Care, Institute of Health and Wellbeing, University of Glasgow, 1  
17 Horelethill Road, Glasgow, G12 9LX, Scotland, United Kingdom

18  
19 8 Tel: +44 141 330 8317

20  
21 9 E-mail: frances.mair@glasgow.ac.uk

22  
23  
24 10

25  
26  
27 11 **Authors:**

28  
29  
30 12 Peter Hanlon<sup>1</sup>, Barbara I. Nicholl<sup>1</sup>, Bhautesh Dinesh Jani<sup>1</sup>, Ross McQueenie<sup>1</sup>, Duncan Lee<sup>2</sup>, Katie I.

31  
32 13 Gallacher<sup>1</sup>, Frances S Mair<sup>1</sup>

33  
34  
35 14 1. General Practice and Primary Care, Institute of Health and Wellbeing, University of Glasgow,  
36 1 Horelethill Road, Glasgow, G12 9LX, Scotland, United Kingdom

37  
38 16 2. School of Mathematics and Statistics, The mathematics and Statistics Building, University of  
39 17 Glasgow, University Place, Glasgow, G12 8SQ

40  
41 18

42  
43 19

44 20 **Word count: 3446**

1  
2  
3 21 **Abstract**  
4

5  
6 22 **Objective:** This study aims: (1) to describe the pattern and extent of multimorbidity and  
7  
8 23 polypharmacy in UK Biobank participants with chronic obstructive pulmonary disease (COPD); and  
9  
10 24 (2) to identify which comorbidities are associated with increased risk of adverse drug reactions  
11  
12 25 (ADRs) resulting from polypharmacy.  
13

14  
15 26 **Design:** Cross-sectional analysis of UK Biobank.  
16

17  
18 27 **Setting:** Community cohort.  
19

20  
21 28 **Participants:** UK Biobank participants comparing self-reported COPD (n=8317) with no COPD  
22  
23 29 (n=494,323).  
24

25  
26 30 **Outcomes:** Multimorbidity ( $\geq$  four conditions) and polypharmacy ( $\geq$  five medications) in participants  
27  
28 31 with COPD versus those without. Risk of ADRs (taking  $\geq$  three medications associated with falls,  
29  
30 32 constipation, urinary retention, central nervous system (CNS) depression, bleeding or renal injury) in  
31  
32 33 relation to the presence of COPD and individual comorbidities.  
33

34  
35 34 **Results:** Multimorbidity was more common in participants with COPD than those without (17% vs.  
36  
37 35 4%). Polypharmacy was highly prevalent (52% with COPD taking  $\geq$  five medications vs 18% in those  
38  
39 36 without COPD). Adjusting for age, sex and socioeconomic status, those with COPD were significantly  
40  
41 37 more likely than those without to be prescribed  $\geq$ 3 medications contributing to falls (Odds ratio (OR)  
42  
43 38 2.27, 95% confidence interval (CI) 2.13 to 2.42), constipation (OR 3.42, 95% CI 3.10 to 3.77), urinary  
44  
45 39 retention (OR 3.38, 95% CI 2.94 to 3.87), CNS depression (OR: 3.75, 95% CI 3.31 to 4.25), bleeding  
46  
47 40 (OR 4.61, 95% CI 3.35 to 6.19) and renal injury (OR 2.22, 95% CI 1.86 to 2.62). Comorbid  
48  
49 41 cardiovascular disease was associated with the greatest risk of taking  $\geq$ 3 medications associated with  
50  
51 42 falls/renal injury. Comorbid mental health conditions were most strongly associated with  
52  
53 43 medications linked with CNS depression/urinary retention/bleeding.  
54

55  
56 44 **Conclusions:** Multimorbidity is common in COPD and associated with high levels of polypharmacy.  
57  
58 45 Co-prescription of drugs with various ADRs is common. Medications contributing to this risk are  
59  
60 46 largely indicated for the management of associated comorbidities rather than COPD. Future

1  
2  
3 47 research should examine the effects on healthcare outcomes of co-prescribing multiple drugs with  
4  
5 48 similar potential ADRs. COPD clinical guidelines should emphasise assessment of comorbidities and  
6  
7 49 risk of ADRs.  
8  
9

10 **Abstract word count: 325**  
11  
12  
13 51  
14  
15  
16 52  
17  
18

19 **Strengths and Limitations**  
20

- 21 54 • This paper assesses multimorbidity, polypharmacy and risk of adverse drug reactions are  
22  
23 55 assessed in UK Biobank participants with self-reported COPD compared with those without  
24  
25 56 COPD.  
26  
27  
28 57 • Baseline variables from the UK Biobank assessment centre were used to adjust for potential  
29  
30 58 confounders.  
31  
32 59 • Cumulative risk of common adverse drug reactions was quantified by identifying UK Biobank  
33  
34 60 participants taking three or more medications associated with similar adverse drug  
35  
36 61 reactions.  
37  
38 62 • Analyses were repeated using a subgroup of participants with spirometry data confirming  
39  
40 63 airflow obstruction.  
41  
42 64 • Medication and comorbidity data rely on participant self-report, and may thus be  
43  
44 65 susceptible to bias or inaccuracy.  
46  
47 66  
48  
49  
50 67

1  
2  
3 68 **BACKGROUND**  
4  
5

6 69 In people with Chronic Obstructive Pulmonary Disease (COPD), multimorbidity (the presence of two  
7  
8 70 or more long-term conditions (LTCs)) is highly prevalent.(1-4) A recent meta-analysis of 29 datasets  
9  
10 71 demonstrated that those with COPD are significantly more likely to be diagnosed with a range of  
11  
12 72 cardiovascular comorbidities than those without COPD (we will use the term comorbidity when  
13  
14 73 referring to specific conditions in addition to COPD, and multimorbidity to refer to the presence of  
15  
16 74 two or more LTCs).(5) Other LTCs with known increased prevalence in COPD include obesity,(6)  
17  
18 75 depression,(7-10) gastro-oesophageal reflux disease,(11-13) osteoporosis,(14-16) and lung  
19  
20 76 cancer.(17, 18) Each of these comorbidities has been associated with poorer health related  
21  
22 77 outcomes in COPD when compared to those with no comorbidity.(19-30) The overall burden of  
23  
24 78 multimorbidity also impacts prognosis in COPD, for example higher number of comorbidities is  
25  
26 79 associated with higher risk of mortality,(31) and higher burden of morbidity assessed using the  
27  
28  
29 80 Charlson index and the COPD-specific comorbidity test (COTE) is associated with higher risk of all-  
30  
31 81 cause and respiratory specific mortality.(32, 33)  
32  
33  
34 82  
35  
36  
37 83 Multimorbidity in the general population is associated with polypharmacy (often defined as  
38  
39 84 concomitant use of  $\geq 5$  or  $\geq 10$  pharmacological agents).(34) Polypharmacy has been associated with  
40  
41 85 increased risk of adverse drug reactions (ADRs)(35-37) and potentially preventable hospital  
42  
43 86 admissions, particularly in the elderly.(38, 39) It has been demonstrated that diagnosis of COPD is  
44  
45 87 associated with increased risk of polypharmacy.(40, 41) This is, in large measure, due to the high  
46  
47 88 burden of extra-pulmonary comorbidities.(42) However, little is known about the risk of ADRs in the  
48  
49 89 context of multimorbidity in COPD.  
50  
51  
52 90  
53  
54  
55  
56  
57  
58  
59  
60

1  
2  
3 91 Given the well-established burden of multimorbidity and polypharmacy in COPD, it is likely that  
4  
5 92 those with COPD are at increased risk of ADRs resulting from polypharmacy. Previous analyses have  
6  
7 93 not focused on the risk of specific ADRs, or assessed which comorbidities increase this risk, instead  
8  
9 94 reporting overall counts of prescribed medication. Data collected for the UK Biobank cohort offers  
10  
11 95 an opportunity to assess how multimorbidity in COPD relates to polypharmacy and to assess the  
12  
13 96 prevalence of co-prescription of medications with similar ADRs.  
14  
15

16 97

17  
18  
19 98 This paper aims:

- 20  
21  
22 99 • To describe the pattern and extent of multimorbidity and polypharmacy in UK Biobank  
23  
24 100 participants with COPD.  
25  
26 101 • To identify which comorbidities in people with COPD are associated with increased risk of  
27  
28 102 ADRs resulting from polypharmacy.  
29  
30

31 103  
32  
33  
34  
35  
36  
37  
38  
39  
40  
41  
42  
43  
44  
45  
46  
47  
48  
49  
50  
51  
52  
53  
54  
55  
56  
57  
58  
59  
60

1  
2  
3 104 **METHODS**  
4

5  
6 105 **Data collection**  
7

8 106 Between 2006 and 2010, UK Biobank recruited 502,640 participants aged 37 to 73. Participants  
9  
10 107 underwent baseline assessments at one of 22 assessment centres throughout England, Scotland and  
11  
12 108 Wales. Sociodemographic and lifestyle details were recorded using touchscreen questionnaires.  
13  
14 109 Townsend scores were derived from participant postcodes to provide an area-based measure of  
15  
16 110 socioeconomic deprivation. Self-reported LTCs, prescribed and over-the-counter medications,  
17  
18 111 smoking status (current, previous or never) and frequency of alcohol intake (never / special  
19  
20 112 occasions only, one-three times a month, at least once a week) were recorded from a touchscreen  
21  
22 113 questionnaire and subsequent verbal interview with a study nurse. Physical activity was self-  
23  
24 114 reported and classified into: none (no physical activity in the last four weeks), low (light 'DIY' activity  
25  
26 115 only in the last four weeks), medium (heavy DIY and/or walking for pleasure and/or other exercises  
27  
28 116 in the last four weeks), high (strenuous sports in the last four weeks).  
29  
30  
31 117 Study centre staff also collected physical measures including height and weight (to calculate body  
32  
33 118 mass index (BMI)) and spirometry. Spirometry was performed using a Vitalograph Pneumotrac 6800.  
34  
35 119 Individual reasons for contraindications to attempting spirometry were not recorded but, according  
36  
37 120 to protocol, these included chest infection in the last month, history of collapsed lung, and heart  
38  
39 121 attack or surgery in the past three months. Full details of the Biobank spirometry protocol are  
40  
41 122 available at <https://biobank.ctsu.ox.ac.uk/crystal/docs/Spirometry.pdf>. In brief, participants were  
42  
43 123 allowed up to three attempts to provide two reproducible spirometry measurements. Where the  
44  
45 124 reproducibility of the first two was deemed acceptable (<5% variation in both FEV1 and FVC) a third  
46  
47 125 measurement was not performed. All values were recorded along with any error messages  
48  
49 126 generated. As per the American Thoracic Society/European Respiratory Society (ATS/ERS) end-of-  
50  
51 127 test criteria, we interpreted as valid any measurement with no error message or if 'user accepted'  
52  
53 128 was specified.(43) No post-bronchodilator measurements were recorded, which deviates from the  
54  
55  
56  
57  
58  
59  
60



1  
2  
3 129 ATS/ERS guidelines and the Global Initiative for Chronic Obstructive Lung Disease (GOLD) guidelines  
4  
5 130 for COPD.(44, 45)

6  
7  
8 131 Participants provided full informed consent to participate in UK Biobank and this study had full  
9  
10 132 ethical approval from the NHS National Research Ethics Service for UK Biobank studies (Ref  
11  
12 133 16/NW/0274).

13  
14  
15 134

### 16 17 18 135 **Defining COPD**

19  
20 136 Participants reporting to have been diagnosed with chronic obstructive pulmonary disease, chronic  
21  
22 137 bronchitis, or emphysema at the nurse-led interview were coded as having 'self-reported COPD'.

23  
24  
25 138 Due to the potential inaccuracies of using self-reported diagnoses, we identified a subset of those  
26  
27 139 with self-reported COPD who met an adaptation of the Global Initiative for Obstructive Lung Disease  
28  
29 140 (GOLD) spirometry criteria for COPD.(45) This subset, referred to as 'GOLD COPD', was used as a  
30  
31 141 sensitivity analysis for self-reported COPD, and to stratify findings by severity of airflow obstruction.

32  
33  
34 142 For participants with self-report COPD and valid spirometry measurements, we calculated the ratio  
35  
36 143 of forced expiratory volume in 1 second (FEV1) to forced vital capacity (FVC) using the highest

37  
38 144 measurement for each participant meeting the American Thoracic Society/European Respiratory  
39  
40 145 Society end-of-test criteria.(43) Those with a FEV1/FVC ratio <0.7 were classed as having an

41  
42 146 obstructive deficit and thus meeting the GOLD diagnostic criteria for COPD. We used the Hankinson  
43  
44 147 equation,(46) based on recorded age, sex and height, to calculate predicted FEV1 values for each

45  
46 148 participant. Those with GOLD COPD were classified on the basis of their best available FEV1  
47  
48 149 measurement as having mild (>80% predicted FEV1), moderate (50-80% predicted FEV1), or severe  
49  
50 150 (<50% predicted FEV1) airflow obstruction in line with the GOLD COPD guidelines.(45)

51  
52  
53  
54 151

1  
2  
3 152 **Defining comorbidities and medications**  
4

5  
6 153 All morbidities were defined by self-report. For the purposes of examining the number of  
7  
8 154 comorbidities reported, a count (1,2,3,4 or  $\geq 5$ ) was taken from a list of 42 morbidities originally  
9  
10 155 established for a large epidemiological study in Scotland, through systematic review, the Quality and  
11  
12 156 Outcomes Framework, NHS Scotland and an expert panel (47), and subsequently amended for UK  
13  
14 157 Biobank (48). Morbidities were categorised for the purposes of this analysis into cardiovascular  
15  
16 158 disease, gastrointestinal disease, mental health conditions, cancer, and painful conditions. Full  
17  
18 159 details of conditions comprising each category can be found in appendix 1.

20  
21 160 Medication data were collected by self-report. Medications were coded by mechanism of action  
22  
23 161 according to the British National Formulary (BNF) (e.g. Angiotensin-converting enzyme inhibitors,  
24  
25 162 beta-blockers, calcium channel blockers, etc.). For some situations where more than one medication  
26  
27 163 with a similar mechanism of action may be commonly co-prescribed (e.g. aspirin and clopidogrel,  
28  
29 164 both antiplatelets) these were coded separately. A complete list of the medications coded within  
30  
31 165 each class can be found in appendix 2.

33  
34 166 We defined those at risk of specific ADRs as anyone on 3 or more medications with similar potential  
35  
36 167 ADRs, based on information provided in the *Scottish Government Model of Care Polypharmacy*  
37  
38 168 *Working Group: Polypharmacy Guidance*.(49) This guideline cross-tabulates commonly prescribed  
39  
40 169 medications with common ADRs to help identify those at cumulative risk of ADRs. This document  
41  
42 170 groups common medications by similar potential ADRs. While this list is not all-inclusive, and the cut-  
43  
44 171 off value of three or more medications is arbitrary, this does allow an estimation of the cumulative  
45  
46 172 risk of specific ADRs. We identified six potential ADRs (falls/fractures, constipation, urinary  
47  
48 173 retention, CNS depression, bleeding and renal injury) for which the proportion of participants taking  
49  
50 174 three or more associated medications could be assessed.

51  
52  
53  
54 175

1  
2  
3 176 **Statistical analysis**  
4

5  
6 177 Study hypothesis was made an analyses planned prior to inspection of the data.  
7

8  
9 178 Baseline variables

10  
11 179 Comparisons were made between participants with self-reported COPD and the rest of the cohort  
12  
13 180 (who did not report COPD). Age, sex, smoking status, deprivation (Townsend score), BMI, physical  
14  
15 181 activity and frequency of alcohol intake were compared using  $\chi^2$  test for categorical variables,  $\chi^2$  test  
16  
17 182 for trend for ordinal variables, and Mann-Whitney-U test for continuous variables. Total number of  
18  
19 183 morbidities, prevalence of specific morbidities, number of self-reported prescribed medications, and  
20  
21 184 proportion of participants taking each class of medication (Appendix 2), were also compared  
22  
23 185 between those with self-reported COPD and the rest of the cohort. All comparisons were repeated  
24  
25 186 comparing participants with GOLD COPD only with those without COPD, stratifying by severity of  
26  
27 187 airflow obstruction.  
28  
29  
30

31 188 **Multimorbidity and polypharmacy**  
32  
33

34 189 Logistic regression analyses were used to compare participants with self-reported COPD and those  
35  
36 190 without COPD. Odds ratios (OR) and 95% confidence intervals (95% CI) were calculated for:

- 37  
38  
39 191 • the presence of cardiovascular disease, cancer, gastrointestinal disease, mental health  
40  
41 192 conditions and painful conditions  
42  
43 193 • the presence of four or more morbidities (excluding COPD)  
44  
45 194 • the use of five or more, and 10 or more, medications (two separate models)  
46  
47

48 195 Models were initially adjusted for age, sex and socioeconomic deprivation (model 1), then adjusted  
49  
50 196 for the addition of smoking status, alcohol frequency, BMI and physical activity (model 2). These  
51  
52 197 analyses were repeated comparing those with GOLD COPD only to those without COPD.  
53  
54

55 198 **Risk of ADRs**  
56  
57  
58  
59  
60

1  
2  
3 199 For each potential ADR (falls/fractures, constipation, urinary retention, CNS depression, bleeding  
4  
5 200 and renal injury) participants taking three or more medications associated with that ADR were  
6  
7 201 identified. The following comparisons were then made:

- 8  
9  
10 202 • Unadjusted percentages at risk of each ADR were calculated for participants without COPD,  
11  
12 203 with self-reported COPD, and with self-reported COPD plus each category of comorbidity  
13  
14 204 (cardiovascular disease, cancer, gastrointestinal disease, mental health conditions and  
15  
16 205 painful conditions) to give an impression of the ADR risk in COPD, and identify comorbidities  
17  
18 206 that may increase this risk.
- 19  
20 207 • ORs of being at risk of each ADR were calculated comparing those with self-reported COPD  
21  
22 208 to those without COPD adjusting for age, sex and socioeconomic deprivation (model 1) and  
23  
24 209 for age, sex, socioeconomic deprivation, smoking status, alcohol frequency, BMI and physical  
25  
26 210 activity (model 2).
- 27  
28 211 • ORs of being at risk of each ADR were calculated comparing those with and without self-  
29  
30 212 reported COPD in each comorbidity category to (i.e. participants with cardiovascular disease  
31  
32 213 alone compared to participants with cardiovascular disease plus COPD, etc.). This was  
33  
34 214 intended to identify whether specific patterns of multimorbidity in COPD are associated with  
35  
36 215 increased ADR risk. Adjustment for a wide range of potential confounders was not  
37  
38 216 appropriate in these models due to the smaller number of participants in each model.

39  
40  
41  
42 217 Each analysis was repeated comparing GOLD COPD only to those without COPD. Less than 3% of  
43  
44 218 participants (with or without COPD) had missing data for potential confounding variables (table 1).  
45  
46 219 Those with missing data were excluded from adjusted analyses. Spirometry data were missing for  
47  
48 220 3591 participants with self-report COPD (43%), hence the use of the GOLD COPD subset as a  
49  
50 221 sensitivity analysis.

51  
52  
53 222 All analyses were performed using R statistical software (version 3.3.1).  
54  
55  
56  
57  
58  
59  
60

1  
2  
3 223  
4  
5

6 224 **RESULTS**  
7

8 225 At the time of recruitment, 8317 participants reported having COPD (1.7%) and are referred to here  
9  
10 226 as the self-report COPD group. Of those who self-reported COPD, 4726 (57%) had valid spirometry  
11  
12 227 measurements. Spirometry was contraindicated or not available in 2507 of those with self-reported  
13  
14 228 COPD. Spirometry measurements did not meet the ATS/ESR end-of-test criteria in 1084  
15  
16 229 participants.(43) Of those with valid spirometry, 2620 (55%) met the GOLD criteria for airflow  
17  
18 230 obstruction (399 (15%) mild, 1409 (54%) moderate, 812 (31%) severe, see Figure 1) and are referred  
19  
20  
21 231 to here as GOLD COPD.  
22  
23

24 232  
25

26  
27 233 **Baseline variables**  
28

29  
30 234 Table 1 describes and compares the characteristics of those with and without COPD in UK Biobank.  
31  
32 235 Participants with COPD (both self-report and GOLD) were significantly older, more socioeconomically  
33  
34 236 deprived, and less physically active. A higher proportion of those with COPD were male, obese and  
35  
36 237 had a history of smoking.  
37  
38

39 238  
40  
41  
42  
43  
44  
45  
46  
47  
48  
49  
50  
51  
52  
53  
54  
55  
56  
57  
58  
59  
60

| Table 1. Baseline variables               |                          |      |                              |      |         |                             |      |         |
|-------------------------------------------|--------------------------|------|------------------------------|------|---------|-----------------------------|------|---------|
| Characteristic                            | No COPD<br>n=494323      |      | COPD (self-report)<br>n=8317 |      |         | GOLD GOPD<br>n=2620         |      |         |
|                                           | Count                    | %    | Count                        | %    | p-value | Count                       | %    | p-value |
| <b>Sex</b>                                |                          |      |                              |      |         |                             |      |         |
| Male                                      | 224906                   | 45.5 | 4268                         | 51.3 |         | 1426                        | 54.4 |         |
| Female                                    | 269417                   | 54.5 | 4049                         | 48.7 | <0.001  | 1194                        | 45.6 | <0.001  |
| <b>Age</b>                                | Median: 58<br>IQR: 50-63 |      | Median: 62<br>IQR: 57-66     |      | <0.001  | Median:<br>63<br>IQR: 59-66 |      | <0.001  |
| <b>Ethnicity</b>                          |                          |      |                              |      |         |                             |      |         |
| White                                     | 464770                   | 94.5 | 8052                         | 97.3 |         | 2620                        | 100  |         |
| Other                                     | 26821                    | 5.4  | 219                          | 2.6  | <0.001  | 0                           | 0    | <0.001  |
| Missing                                   | 2732                     |      | 46                           |      |         | 0                           | 0    |         |
| <b>Socioeconomic deprivation quintile</b> |                          |      |                              |      |         |                             |      |         |
| 1 (least deprived)                        | 99672                    | 20.2 | 1015                         | 12.2 |         | 309                         | 11.8 |         |
| 2                                         | 98977                    | 20.0 | 1142                         | 13.7 |         | 362                         | 13.8 |         |
| 3                                         | 99013                    | 20.1 | 1399                         | 16.8 |         | 440                         | 16.8 |         |
| 4                                         | 98660                    | 20.0 | 1735                         | 20.9 |         | 580                         | 22.2 |         |
| 5 (most deprived)                         | 98385                    | 19.7 | 3015                         | 36.3 | <0.001  | 926                         | 35.4 | <0.001  |
| Missing                                   | 616                      |      | 11                           |      |         | 3                           |      |         |
| <b>Smoking status</b>                     |                          |      |                              |      |         |                             |      |         |
| Current                                   | 50817                    | 10.3 | 2172                         | 26.3 |         | 833                         | 32.2 |         |
| Previous                                  | 169015                   | 34.4 | 4083                         | 49.5 |         | 1398                        | 54.0 |         |
| Never                                     | 271602                   | 55.3 | 1999                         | 24.2 | <0.001  | 360                         | 13.9 | <0.001  |
| Missing                                   | 2889                     |      | 63                           |      |         | 29                          |      |         |
| <b>Alcohol frequency</b>                  |                          |      |                              |      |         |                             |      |         |
| Daily                                     | 100070                   | 20.3 | 1720                         | 20.7 |         | 618                         | 23.6 |         |
| 3-4 times/week                            | 114058                   | 23.1 | 1404                         | 16.9 |         | 475                         | 18.2 |         |
| 1-2 times/week                            | 127459                   | 25.9 | 1863                         | 22.5 |         | 561                         | 21.5 |         |
| 1-3 times/month                           | 54979                    | 11.2 | 894                          | 10.8 |         | 289                         | 11.1 |         |
| Occasional                                | 56707                    | 11.5 | 1322                         | 15.9 |         | 387                         | 14.8 |         |
| Never                                     | 39569                    | 8.0  | 1092                         | 13.2 | <0.001  | 284                         | 10.9 | <0.001  |
| Missing                                   | 1481                     |      | 22                           |      |         | 6                           |      |         |
| <b>BMI</b>                                |                          |      |                              |      |         |                             |      |         |
| <18.5                                     | 2478                     | 0.5  | 148                          | 1.8  |         | 56                          | 2.2  |         |
| 18.5-24.9                                 | 155282                   | 31.8 | 2185                         | 26.8 |         | 829                         | 31.9 |         |
| 25.0-29.9                                 | 211102                   | 43.2 | 3165                         | 38.9 |         | 1049                        | 40.4 |         |
| >30                                       | 119813                   | 24.5 | 2647                         | 32.5 | <0.001  | 665                         | 25.6 | <0.001  |
| Missing                                   | 5648                     |      | 172                          |      |         | 21                          |      |         |
| <b>Physical activity</b>                  |                          |      |                              |      |         |                             |      |         |
| High                                      | 49827                    | 10.6 | 250                          | 3.1  |         | 70                          | 2.7  |         |
| Medium                                    | 387766                   | 79.6 | 5838                         | 72.0 |         | 1902                        | 73.3 |         |
| Low                                       | 18354                    | 3.8  | 589                          | 7.3  |         | 203                         | 7.8  |         |
| None                                      | 31425                    | 6.4  | 1433                         | 17.7 | <0.001  | 421                         | 16.2 | <0.001  |
| Missing                                   | 6951                     |      | 207                          |      |         | 24                          |      |         |
| <b>FEV1 (% predicted)</b>                 |                          |      |                              |      |         |                             |      |         |
| >80                                       | 272109                   | 78.0 | 1853                         | 39.2 |         | 399                         | 15.2 |         |
| 50-79                                     | 71727                    | 20.6 | 2022                         | 42.8 |         | 1409                        | 53.8 |         |
| <50                                       | 4841                     | 1.4  | 851                          | 18.0 | <0.001  | 812                         | 31.0 | <0.001  |
| Missing                                   | 145646                   |      | 3591                         |      |         | 1061                        |      |         |

239

1  
2  
3 240 **Multimorbidity and polypharmacy**  
4

5  
6 241 Prevalence of each category of comorbidity was higher in those with COPD than without (table 2).  
7  
8 242 After controlling for age, sex and socioeconomic status, those with self-reported COPD were  
9  
10 243 significantly more likely than those without to have each category of comorbidity examined:  
11  
12 244 cardiovascular disease (OR 1.45; 95% confidence interval (CI) 1.39 to 1.52) , cancer (1.29; 1.2 to  
13  
14 245 1.39), gastrointestinal disease (1.76; 1.67 to 1.86) , mental health conditions (2.02; 1.89 to 2.15) ,  
15  
16 246 and painful conditions (1.54; 1.46 to 1.62). Results for GOLD COPD also suggested higher likelihood  
17  
18 247 of each comorbidity compared to those without COPD, although the ORs were lower and results for  
19  
20 248 cancer not statistically significant (appendix 3). Results were similar after adjusting for additional  
21  
22 249 confounders (smoking status, alcohol frequency, BMI and physical activity) with the exception of  
23  
24 250 cardiovascular comorbidity in GOLD COPD, which was no longer significantly associated (1.08; 0.99  
25  
26 251 to 1.18) (appendix 3).  
27  
28  
29  
30 252  
31  
32  
33  
34  
35  
36  
37  
38  
39  
40  
41  
42  
43  
44  
45  
46  
47  
48  
49  
50  
51  
52  
53  
54  
55  
56  
57  
58  
59  
60

| Table 2: Comorbidities in those with and without COPD           |                                  |                                            |                            |                            |                                 |                               |
|-----------------------------------------------------------------|----------------------------------|--------------------------------------------|----------------------------|----------------------------|---------------------------------|-------------------------------|
|                                                                 | Control<br>n=494323<br>count (%) | Self-report<br>COPD<br>n=8317<br>count (%) | GOLD COPD                  |                            |                                 |                               |
|                                                                 |                                  |                                            | All<br>n=2620<br>count (%) | Mild<br>n=399<br>count (%) | Moderate<br>n=1409<br>count (%) | Severe<br>n= 812<br>count (%) |
| <b>Total comorbidities (excluding COPD) <math>\geq 4</math></b> | 19959 (4.0)                      | 1389 (16.7)**                              | 331 (12.6)**               | 46 (11.5)                  | 191 (13.5)                      | 94 (11.6)                     |
| <b>Total number of medications <math>\geq 1</math></b>          | 356406 (72.1)                    | 7670 (92.2)**                              | 2452 (93.6)**              | 352 (88.2)                 | 1321 (93.8)                     | 779 (95.9)                    |
| $\geq 5$                                                        | 87286 (17.7)                     | 4312 (51.8)**                              | 1349 (51.5)**              | 171 (42.9)                 | 702 (49.8)                      | 476 (58.6)                    |
| $\geq 10$                                                       | 10678 (2.2)                      | 1269 (15.3)**                              | 329 (12.6)**               | 31 (7.8)                   | 172 (12.2)                      | 126 (15.5)                    |
| <b>Prevalence of comorbidities</b>                              |                                  |                                            |                            |                            |                                 |                               |
| <b>Cardiovascular</b>                                           | <b>152891 (30.9)</b>             | <b>3957 (47.6)**</b>                       | <b>1156 (44.1)**</b>       | <b>142 (35.6)</b>          | <b>611 (43.4)</b>               | <b>403 (49.6)</b>             |
| Hypertension                                                    | 130119 (26.3)                    | 3206 (38.5)**                              | 916 (35.0)**               | 112 (28.1)                 | 483 (34.3)                      | 321 (39.5)                    |
| CHD                                                             | 21560 (4.4)                      | 1171 (14.1)**                              | 315 (12.0)**               | 31 (7.6)                   | 185 (13.1)                      | 99 (12.2)                     |
| Diabetes                                                        | 24737 (5.0)                      | 766 (9.1)**                                | 189 (7.2)**                | 16 (4.0)                   | 109 (7.7)                       | 64 (7.9)                      |
| Stroke/TIA                                                      | 8459 (1.7)                       | 395 (4.7)**                                | 98 (3.7)**                 | 11 (2.8)                   | 51 (3.6)                        | 36 (4.4)                      |
| AF                                                              | 3552 (0.7)                       | 99 (1.2)**                                 | 34 (1.3)**                 | 3 (0.8)                    | 16 (1.1)                        | 15 (1.8)                      |
| Heart failure                                                   | 768 (0.2)                        | 35 (0.4)**                                 | 6 (0.2)                    | 0                          | 1 (0.1)                         | 5 (0.6)                       |
| <b>Respiratory</b>                                              |                                  |                                            |                            |                            |                                 |                               |
| Asthma                                                          | 55245 (11.2)                     | 3048 (36.6)**                              | 984 (37.6)**               | 142 (35)                   | 523 (37.1)                      | 319 (39.3)                    |
| PE/DVT                                                          | 12316 (2.5)                      | 554 (6.7)**                                | 139 (5.3)**                | 29 (7.3)                   | 71 (5.0)                        | 39 (4.8)                      |
| Bronchiectasis                                                  | 968 (0.2)                        | 167 (2.0)**                                | 39 (1.5)**                 | 7 (1.8)                    | 17 (1.2)                        | 15 (1.8)                      |
| Pulmonary fib.                                                  | 504 (0.1)                        | 67 (0.8)**                                 | 18 (0.7)**                 | 3 (0.8)                    | 12 (0.9)                        | 3 (0.4)                       |
| <b>Cancer</b>                                                   | <b>37686 (7.6)</b>               | <b>937 (11.3)</b>                          | <b>272 (10.4)</b>          | <b>47 (11.8)</b>           | <b>146 (10.4)</b>               | <b>79 (9.7)</b>               |
| Lung                                                            | 405 (0.1)                        | 52 (0.6)**                                 | 15 (0.6)**                 | 0                          | 7 (0.5)                         | 8 (1.0)                       |
| Breast                                                          | 11311 (2.3)                      | 210 (2.5)*                                 | 57 (2.2)                   | 12 (3.0)                   | 30 (2.1)                        | 15 (1.8)                      |
| Prostate                                                        | 3588 (0.7)                       | 105 (1.3)**                                | 30 (1.1)*                  | 5 (1.3)                    | 12 (0.9)                        | 13 (1.6)                      |
| GI                                                              | 2925 (0.6)                       | 96 (1.2)**                                 | 34 (1.3)**                 | 6 (1.5)                    | 19 (1.3)                        | 9 (1.1)                       |
| Haem                                                            | 6170 (1.2)                       | 124 (1.5)*                                 | 34 (1.3)                   | 5 (1.3)                    | 17 (1.2)                        | 12 (1.5)                      |
| <b>Gastrointestinal</b>                                         | <b>55635 (11.5)</b>              | <b>1737 (20.9)**</b>                       | <b>468 (17.9)**</b>        | <b>76 (19.0)</b>           | <b>254 (18.0)</b>               | <b>138 (17.0)</b>             |
| Dyspepsia                                                       | 37819 (7.7)                      | 1257 (15.1)**                              | 348 (13.3)**               | 53 (13.3)                  | 189 (13.4)                      | 106 (13.1)                    |
| Diverticular dis                                                | 5181 (1.0)                       | 224 (2.7)**                                | 54 (2.1)**                 | 6 (1.5)                    | 32 (2.3)                        | 16 (2.0)                      |
| IBS                                                             | 11203 (2.3)                      | 291 (3.5)**                                | 64 (2.4)**                 | 17 (4.3)                   | 35 (2.5)                        | 12 (1.5)                      |
| CLD                                                             | 935 (0.2)                        | 36 (0.4)**                                 | 10 (0.4)*                  | 2 (0.5)                    | 10 (0.7)                        | 3 (0.4)                       |
| <b>Mental Health</b>                                            | <b>35822 (7.2)</b>               | <b>1127 (13.6)**</b>                       | <b>304 (11.6)**</b>        | <b>54 (13.5)</b>           | <b>162 (11.5)</b>               | <b>88 (10.8)</b>              |
| Depression                                                      | 27578 (5.6)                      | 901 (10.8)**                               | 233 (8.9)**                | 42 (10.5)                  | 128 (9.1)                       | 63 (7.8)                      |
| Anxiety                                                         | 8781 (1.8)                       | 245 (2.9)**                                | 69 (2.6)**                 | 13 (3.3)                   | 36 (2.6)                        | 20 (2.5)                      |
| Schizophrenia/<br>bipolar                                       | 1918 (0.4)                       | 79 (0.9)**                                 | 27 (1.0)**                 | 3 (0.7)                    | 15 (1.1)                        | 9 (1.1)                       |
| <b>Other</b>                                                    |                                  |                                            |                            |                            |                                 |                               |
| Painful condition                                               | 81733 (16.5)                     | 2259 (27.2)**                              | 655 (25.0)**               | 115 (28.8)                 | 367 (26.0)                      | 173 (21.3)                    |
| Osteoporosis                                                    | 7700 (1.6)                       | 342 (4.1)**                                | 128 (4.9)**                | 21 (5.3)                   | 67 (4.8)                        | 40 (4.9)                      |
| Connective tissue<br>disease                                    | 10642 (2.2)                      | 391 (4.7)**                                | 112 (4.3)**                | 19 (4.8)                   | 72 (5.1)                        | 21 (2.6)                      |

Compared with control ( $\chi^2$ ): \* : p<0.05, \*\* : p<0.001

253

254



1  
2  
3 255 Morbidity counts (excluding COPD) and counts of prescribed medication are shown in table 2  
4  
5 256 comparing those with COPD, stratified by severity of airflow obstruction, with those without. Those  
6  
7 257 with COPD had higher numbers of LTCs and more prescribed medications than those without. There  
8  
9 258 was a trend towards more prescribed medications in those with greater severity of airway  
10  
11 259 obstruction. After controlling for age, sex and socioeconomic status, those with self- report COPD  
12  
13 260 were more likely to report  $\geq 4$  comorbidities (3.49; 3.28 to 3.71),  $\geq 5$  medications (3.85; 3.68 to 4.03),  
14  
15 261 and  $\geq 10$  medications (5.72; 5.36 to 6.10) than those without COPD. Results were similar for GOLD  
16  
17 262 COPD and remained statistically significant after adjusting for smoking status, alcohol frequency,  
18  
19 263 BMI and physical activity (appendix 3).

#### 22 264 **ADR Risk**

25 265 Counts and percentages of participants taking specific medications are shown in appendix 4.  
26  
27 266 Participants with COPD (self-report and GOLD) were more likely than those without COPD to be  
28  
29 267 prescribed drugs across a range of disease areas, reflecting the range of comorbidities present  
30  
31 268 among those with COPD. The percentages of participants within each category (no COPD, COPD, and  
32  
33 269 COPD with specific comorbidities) taking three or more medications associated with a similar ADR is  
34  
35 270 shown in Figure 2. For each category of ADR a higher proportion of participants with COPD reported  
36  
37 271 taking three or more associated medications than those without COPD. This increased further with  
38  
39 272 comorbidities, with COPD plus cardiovascular comorbidity associated with the highest percentage  
40  
41 273 taking multiple medications with a risk of falls or renal injury, and those with COPD plus mental  
42  
43 274 health conditions showing the highest percentages taking multiple medications with a risk of  
44  
45 275 constipation, CNS depression or bleeding.

46  
47  
48  
49 276

50  
51  
52 277 After adjusting for age, sex and socioeconomic deprivation, those with self-report COPD remained  
53  
54 278 more likely to be taking three or more medications in each category than those without COPD. These

findings remained statistically significant after adjusting for smoking status, alcohol frequency, BMI and physical activity (Table 3). Findings were similar for GOLD COPD however, after adjusting for additional potentially confounding variables, results for bleeding risk were not statistically significant in this sensitivity analysis (Table 3).

**Table 3. Odds ratios (with 95% CI) for taking 3 of more medications associated with similar ADRs**

| ADR               | Self-report COPD compared with no COPD<br>N=502,640 |                      | GOLD COPD compared with no COPD<br>N=496,943 |                      |
|-------------------|-----------------------------------------------------|----------------------|----------------------------------------------|----------------------|
|                   | Model 1<br>N=502,013                                | Model 2<br>N=487,718 | Model 1<br>N=496,943                         | Model 2<br>N=482,378 |
|                   | OR (95% CI)                                         | OR (95% CI)          | OR (95% CI)                                  | OR (95% CI)          |
| Falls             | 2.27 (2.13 – 2.42) ***                              | 1.83 (1.71-1.96) *** | 1.66 (1.47 – 1.87) ***                       | 1.49 (1.30-1.69) *** |
| Constipation      | 2.71 (2.54 – 2.89) ***                              | 2.66 (2.39-2.96) *** | 2.18 (1.77 – 2.64) ***                       | 1.82 (1.47-2.24) *** |
| Urinary retention | 3.38 (2.94 – 3.87) ***                              | 2.59 (2.22-3.0) ***  | 1.98 (1.44 – 2.64) ***                       | 1.64 (1.18-2.21) **  |
| CNS depression    | 3.75 (3.31 – 4.25) ***                              | 2.81 (2.45-3.22) *** | 2.29 (1.73 – 2.95) ***                       | 1.87 (1.40-2.43) *** |
| Bleeding          | 4.60 (3.35 – 6.19) ***                              | 3.39 (2.40-4.66) *** | 2.63 (1.25 – 4.80) **                        | 1.76 (0.75-3.48) §   |
| Renal injury      | 2.22 (1.86 – 2.62) ***                              | 1.84 (1.53-2.19) *** | 1.94 (1.41 – 2.58) ***                       | 1.84 (1.33-2.49) *** |

§ : p>0.05 \* : p<0.05, \*\* : p<0.01, \*\*\* : p<0.001  
 Model 1: Adjusted for age, sex and socioeconomic status  
 Model 2: Adjusted for age, sex, socioeconomic status, smoking, alcohol frequency, body mass index and physical activity

283

Finally, each category of ADR risk was assessed in a subgroup analysis for each category of comorbidity (cardiovascular, GI, cancer, mental health and painful conditions) comparing those with and without COPD (e.g. participants with cardiovascular disease plus COPD compared with participants with cardiovascular disease alone, etc.). These models were adjusted for age, sex and socioeconomic status only. Within each category of comorbidity, those with self-reported COPD were more likely to be at risk of each ADR than those without COPD (appendix 3). Not all results were statistically significant when using GOLD COPD (Appendix 3).

291

292

293

294

295

1  
2  
3 296 **DISCUSSION**

4  
5  
6 297 **Summary of main findings**

7  
8 298 Multimorbidity and polypharmacy in COPD were common among UK Biobank participants. The  
9  
10 299 presence of one or more comorbidity was highly prevalent in those with COPD (85%). More than half  
11  
12 300 reported polypharmacy (five or more medications), and 15% reported 10 or more medications. The  
13  
14 301 prevalence of cardiovascular disease, as well as the degree of polypharmacy, was higher among  
15  
16 302 those with more severe airflow obstruction.  
17

18  
19  
20 303 For the first time, our data demonstrates that those with COPD were more likely than those without  
21  
22 304 to be prescribed multiple medications ( $\geq$  three) with similar ADRs. Those with COPD plus  
23  
24 305 cardiovascular comorbidity were most likely to be taking multiple medications with a risk of falls and  
25  
26 306 of renal injury, while those with COPD plus comorbid mental health conditions were most likely to  
27  
28 307 be taking medications causing constipation, CNS depression and bleeding. Within each category of  
29  
30 308 comorbidity, those with COPD were more likely to be taking multiple medications with similar ADRs  
31  
32 309 than those without. These associations between patterns of multimorbidity and specific ADR risks  
33  
34 310 have not been described or quantified previously.  
35

36  
37 311

38  
39  
40 312 **Strengths and limitations**

41  
42  
43 313 Strengths of this study include the large sample size with representation from different areas of the  
44  
45 314 UK. The range of data collected at UK Biobank assessment centres meant it was possible to compare  
46  
47 315 a range of sociodemographic characteristics as well as spirometry data, the latter being unusual for a  
48  
49 316 large community based cohort. It is recognised, however, that UK Biobank participants show some  
50  
51 317 evidence of 'healthy volunteer bias', differing from the UK average on a number of socioeconomic,  
52  
53 318 lifestyle and health-related measures. Specifically they are less socioeconomically deprived, less  
54  
55 319 likely to smoke, to be obese, and have fewer self-reported health conditions.(50) All LTC diagnoses  
56  
57

1  
2  
3 320 as well as medication data were self-reported, with no alternative means of verification. We  
4  
5 321 attempted to minimise this limitation by identifying a subset of those with COPD meeting the GOLD  
6  
7 322 diagnostic criteria and repeating the analyses with this subset. Importantly, spirometry values were  
8  
9 323 also pre-bronchodilator, which is in contravention to guidelines for diagnosing COPD. Additionally,  
10  
11 324 information was not available about the strength of indication for medications and individual  
12  
13 325 susceptibility to risk, which is a limitation when considering the risk of ADRs.

16 326 The use of the Scottish Government Polypharmacy Guideline allowed analysis of potential ADR risk  
17  
18 327 by specific common ADRs. The intended purpose of this guideline, however, was not to identify  
19  
20 328 potential risk from a population sample, but rather to identify potential causes of symptoms or  
21  
22 329 complications. The analysis in this study, therefore, serves only as an approximation of potential risk,  
23  
24 330 not an absolute marker of inappropriate polypharmacy. The cross-sectional nature of this analysis  
25  
26 331 also precludes an analysis of actual harm as a result of polypharmacy. Despite these limitations,  
27  
28 332 however, the co-prescription of multiple medications with similar ADRs strongly implies greater  
29  
30 333 potential for harm. The association of such prescribing patterns with COPD, across a range of  
31  
32 334 potential ADRs, is clear from our findings. This analysis is, to the author's knowledge, the first to  
33  
34 335 attempt to quantify this risk for specific ADRs in this way.  
35  
36  
37  
38  
39  
40

### 41 337 **Context and implications**

42  
43  
44 338 The increased prevalence of individual comorbid conditions such as coronary heart disease,  
45  
46 339 hypertension, diabetes, dyspepsia, osteoporosis, cancer, depression and anxiety in those with COPD  
47  
48 340 is similar to the findings from other population based studies of comorbidities in COPD.(5, 11, 51-53)  
49  
50 341 Our finding that cardiovascular disease prevalence increased with increasing severity of COPD is in  
51  
52 342 keeping with the body of literature on cardiovascular comorbidities and COPD, in which high  
53  
54 343 prevalence has been observed in (usually older) cohorts with severe airflow limitation.(5, 21)  
55  
56  
57  
58  
59  
60

1  
2  
3 344 Greater polypharmacy with greater severity of COPD has also been observed previously in older  
4  
5 345 COPD populations,(41, 54) although such analyses have been smaller (n=1859 and 398, respectively)  
6  
7 346 and have not assessed the specific patterns of prescribing in COPD. To the best of our knowledge, no  
8  
9 347 previous studies have assessed the risk of ADRs as a result of polypharmacy in COPD. A recent  
10  
11 348 population-based analysis of prescribing data from 310,000 adults in Scotland showed that over 15  
12  
13 349 years from 1995 to 2010 the proportion of people with polypharmacy and with potentially serious  
14  
15 350 drug-to-drug interactions increased dramatically.(35) The number of prescribed medications was  
16  
17 351 also associated with increased risk of interactions. Our analysis differs in approach from this analysis,  
18  
19 352 by seeking to identify patterns of prescribing increasing risk of specific adverse events, rather than  
20  
21 353 counting total potential interactions. The strength of our approach lies in highlighting specific  
22  
23 354 patterns of comorbidity in which specific ADRs are more likely. Our findings can therefore be applied  
24  
25 355 to clinical practice, highlighting the importance of recognising comorbidity in COPD and being alert  
26  
27 356 to specific ADRs when prescribing medication.  
28  
29  
30  
31 357

32  
33  
34 358 Our findings indicate that in those with COPD the potential for ADRs as a result of combinations of  
35  
36 359 medications is high, and this appears to be the result of a high prevalence of extra-pulmonary  
37  
38 360 comorbidities. Clinical guidelines for COPD should place greater emphasis on the need for  
39  
40 361 assessment of associated comorbidities and the risk of associated ADRs. While our analysis shows  
41  
42 362 potential areas where ADR risk exists in COPD (e.g. falls with comorbid cardiovascular disease, CNS  
43  
44 363 depression, constipation with comorbid mental health conditions), future research is merited to  
45  
46 364 assess what actual harm could be attributed to such prescribing patterns.  
47  
48

## 365 **Conclusion**

366 Among UK Biobank participants with COPD there was considerable multimorbidity and  
367 polypharmacy. Those with COPD were highly likely to be concurrently prescribed multiple

1  
2  
3 368 medications with similar potential adverse effects. Medications contributing to this risk were  
4  
5 369 largely indicated for the management of the associated comorbidities rather than COPD. Future  
6  
7 370 research should examine the effects on healthcare outcomes of co-prescribing of multiple drugs  
8  
9 371 with similar potential of ADRs. Clinical guidelines for COPD should emphasise the need for  
10  
11 372 assessment of comorbidities and the risk of associated ADRs.  
12  
13  
14 373

#### 16 17 374 **Ethics approval and consent to participate**

18  
19  
20 375 Participants provided full informed consent to participate in UK Biobank and this study was covered  
21  
22 376 by the generic ethical approval for UK Biobank studies from the NHS National Research Ethics  
23  
24 377 Service (Ref 16/NW/0274).  
25  
26  
27 378

#### 29 30 379 **Availability of data and materials**

31  
32  
33 380 UK Biobank data is available via [www.ukbiobank.ac.uk](http://www.ukbiobank.ac.uk). Syntax for the generation of derived  
34  
35 381 variables and for the analysis used for this study will be submitted to UK Biobank for record.  
36  
37  
38 382

#### 40 41 383 **Competing interests**

42  
43 384 The authors declare that they have no competing interests  
44  
45  
46 385

#### 48 49 386 **Funding**

50  
51  
52 387 This study was funded by a CSO Catalyst Grant 173804. BDJ was funded by a NHS Research for  
53  
54 388 Scotland career research fellowship.  
55  
56  
57  
58  
59  
60

1  
2  
3 389 **Author contributions**  
4

5  
6 390 All authors (PH, BN, BJ, RM, DL, KG and FM) were involved in the conceptualisation and design of the  
7  
8 391 project and interpretation of results. PH carried out the analysis with support from BJ, RM and BN.  
9  
10 392 DL provided statistical support. All authors had access to the data. PH wrote the first draft of the  
11  
12 393 paper and all authors commented on subsequent drafts. All authors approved the final draft for  
13  
14 394 publication. FM is guarantor.  
15

16  
17 395  
18

19  
20 396 **Acknowledgements**  
21

22  
23 397 This research has been conducted using the UK Biobank Resource, approved project number 14151.  
24

25  
26 398  
27

28  
29 399  
30

31 400 **References**

- 32  
33 401 1. Anecchino C, Rossi E, Fanizza C, De Rosa M, Tognoni G, Romero M. Prevalence of chronic  
34 402 obstructive pulmonary disease and pattern of comorbidities in a general population. *International*  
35 403 *journal of chronic obstructive pulmonary disease*. 2007;2(4):567-74.  
36 404 2. Fumagalli G, Fabiani F, Forte S, Napolitano M, Marinelli P, Palange P, et al. INDACO project: a  
37 405 pilot study on incidence of comorbidities in COPD patients referred to pneumology units.  
38 406 *Multidisciplinary Respiratory Medicine*. 2013;8.  
39 407 3. Putcha N, Puhan MA, Hansel NN, Drummond MB, Boyd CM. Impact of co-morbidities on self-  
40 408 rated health in self-reported COPD: An analysis of NHANES 2001-2008. *Copd-Journal of Chronic*  
41 409 *Obstructive Pulmonary Disease*. 2013;10(3):324-32.  
42 410 4. Garcia-Olmos L, Alberquilla A, Ayala V, Garcia-Sagredo P, Morales L, Carmona M, et al.  
43 411 Comorbidity in patients with chronic obstructive pulmonary disease in family practice: a cross  
44 412 sectional study. *BMC family practice*. 2013;14.  
45 413 5. Chen W, Thomas J, Sadatsafavi M, FitzGerald JM. Risk of cardiovascular comorbidity in  
46 414 patients with chronic obstructive pulmonary disease: a systematic review and meta-analysis. *Lancet*  
47 415 *Respir Med*. 2015;3(8):631-9.  
48 416 6. Rodriguez DA, Garcia-Aymerich J, Valera JL, Sauleda J, Toghores B, Galdiz JB, et al.  
49 417 Determinants of exercise capacity in obese and non-obese COPD patients. *Respiratory Medicine*.  
50 418 2014;108(5):745-51.  
51 419 7. Al-shair K, Dockry R, Mallia-Milanes B, Kolsum U, Singh D, Vestbo J. Depression and its  
52 420 relationship with poor exercise capacity, BODE index and muscle wasting in COPD. *Respiratory*  
53 421 *Medicine*. 2009;103(10):1572-9.  
54  
55  
56  
57  
58  
59

- 422 8. Di Marco F, Verga M, Reggente M, Casanova FM, Santus P, Blasi F, et al. Anxiety and  
423 depression in COPD patients: The roles of gender and disease severity. *Respiratory Medicine*.  
424 2006;100(10):1767-74.
- 425 9. Qian J, Simoni-Wastila L, Rattinger GB, Lehmann S, Langenberg P, Zuckerman IH, et al.  
426 Associations of depression diagnosis and antidepressant treatment with mortality among young and  
427 disabled Medicare beneficiaries with COPD. *General Hospital Psychiatry*. 2013;35(6):612-8.
- 428 10. Atlantis E, Fahey P, Cochrane B, Smith S. Bidirectional Associations Between Clinically  
429 Relevant Depression or Anxiety and COPD A Systematic Review and Meta-analysis. *Chest*.  
430 2013;144(3):766-77.
- 431 11. Bor S, Kitapcioglu G, Solak ZA, Ertlav M, Erdinc M. Prevalence of gastroesophageal reflux  
432 disease in patients with asthma and chronic obstructive pulmonary disease. *Journal of*  
433 *Gastroenterology and Hepatology*. 2010;25(2):309-13.
- 434 12. Garcia Rodriguez LA, Ruigomez A, Martin-Merino E, Johansson S, Wallander M-A.  
435 Relationship Between Gastroesophageal Reflux Disease and COPD in UK Primary Care. *Chest*.  
436 2008;134(6):1223-30.
- 437 13. Kim J, Lee JH, Kim Y, Kim K, Oh Y-M, Yoo KH, et al. Association between chronic obstructive  
438 pulmonary disease and gastroesophageal reflux disease: a national cross-sectional cohort study. *Bmc*  
439 *Pulmonary Medicine*. 2013;13.
- 440 14. Ferguson GT, Calverley PMA, Anderson JA, Jenkins CR, Jones PW, Willits LR, et al. Prevalence  
441 and Progression of Osteoporosis in Patients With COPD Results From the Towards a Revolution in  
442 COPD Health Study. *Chest*. 2009;136(6):1456-65.
- 443 15. Jorgensen NR, Schwarz P, Holme I, Henriksen BM, Petersen LJ, Backer V. The prevalence of  
444 osteoporosis in patients with chronic obstructive pulmonary disease - A cross sectional study.  
445 *Respiratory Medicine*. 2007;101(1):177-85.
- 446 16. Ogura-Tomomatsu H, Asano K, Tomomatsu K, Miyata J, Ohmori N, Kodama M, et al.  
447 Predictors of Osteoporosis and Vertebral Fractures in Patients Presenting with Moderate-to-Severe  
448 Chronic Obstructive Lung Disease. *Copd-Journal of Chronic Obstructive Pulmonary Disease*.  
449 2012;9(4):332-7.
- 450 17. Young RP, Hopkins RJ, Christmas T, Black PN, Metcalf P, Gamble GD. COPD prevalence is  
451 increased in lung cancer, independent of age, sex and smoking history. *European Respiratory*  
452 *Journal*. 2009;34(2):380-6.
- 453 18. Wilson DO, Weissfeld JL, Balkan A, Schragin JG, Fuhrman CR, Fisher SN, et al. Association of  
454 radiographic emphysema and airflow obstruction with lung cancer. *American Journal of Respiratory*  
455 *and Critical Care Medicine*. 2008;178(7):738-44.
- 456 19. Garcia-Rio F, Soriano JB, Miravittles M, Munoz L, Duran-Tauleria E, Sanchez G, et al. Impact  
457 of Obesity on the Clinical Profile of a Population-Based Sample with Chronic Obstructive Pulmonary  
458 Disease. *Plos One*. 2014;9(8).
- 459 20. Cecere LM, Littman AJ, Slatore CG, Udris EM, Bryson CL, Boyko EJ, et al. Obesity and COPD:  
460 Associated Symptoms, Health-related Quality of Life, and Medication Use. *Copd-Journal of Chronic*  
461 *Obstructive Pulmonary Disease*. 2011;8(4):275-84.
- 462 21. Mannino DM, Thorn D, Swensen A, Holguin F. Prevalence and outcomes of diabetes,  
463 hypertension and cardiovascular disease in COPD. *European Respiratory Journal*. 2008;32(4):962-9.
- 464 22. Curkendall SM, DeLuise C, Jones JK, Lanes S, Stang MR, Goehring E, et al. Cardiovascular  
465 disease in patients with chronic obstructive pulmonary disease, Saskatchewan Canada  
466 cardiovascular disease in COPD patients. *Annals of Epidemiology*. 2006;16(1):63-70.
- 467 23. McGarvey LP, John M, Anderson JA, Zvarich M, Wise RA. Ascertainment of cause-specific  
468 mortality in COPD: operations of the TORCH Clinical Endpoint Committee. *Thorax*. 2007;62(5):411-5.
- 469 24. Zielinski J, MacNee W, Wedzicha J, Ambrosino N, Braghiroli A, Dolensky J, et al. Causes of  
470 death in patients with COPD and chronic respiratory failure. *Monaldi archives for chest disease =*  
471 *Archivio Monaldi per le malattie del torace*. 1997;52(1):43-7.



- 1  
2  
3 472 25. Mannino DM, Doherty DE, Buist AS. Global Initiative on Obstructive Lung Disease (GOLD)  
4 473 classification of lung disease and mortality: findings from the Atherosclerosis Risk in Communities  
5 474 (ARIC) study. *Respiratory Medicine*. 2006;100(1):115-22.
- 6 475 26. Campo G, Guastaroba P, Marzocchi A, Santarelli A, Varani E, Vignali L, et al. Impact of COPD  
7 476 on Long-term Outcome After ST-Segment Elevation Myocardial Infarction Receiving Primary  
8 477 Percutaneous Coronary Intervention. *Chest*. 2013;144(3):750-7.
- 9 478 27. Konecny T, Somers K, Orban M, Koskino Y, Lennon RJ, Scanlon PD, et al. Interactions  
10 479 Between COPD and Outcomes After Percutaneous Coronary Intervention. *Chest*. 2010;138(3):621-7.
- 11 480 28. Sidney S, Sorel M, Quesenberry CP, DeLuise C, Lanes S, Eisner MD. COPD and incident  
12 481 cardiovascular disease hospitalizations and mortality: Kaiser permanente medical care program.  
13 482 *Chest*. 2005;128(4):2068-75.
- 14 483 29. Sakae TM, Menezes Pizzichini MM, Zimmermann Teixeira PJ, da Silva RM, Trevisol DJ, Pizzichini  
15 484 E. Exacerbations of COPD and symptoms of gastroesophageal reflux: a systematic review and meta-  
16 485 analysis. *Jornal Brasileiro De Pneumologia*. 2013;39(3):259-71.
- 17 486 30. Hattiholi J, Gaude GS. Prevalence and correlates of osteoporosis in chronic obstructive  
18 487 pulmonary disease patients in India. *Lung India : official organ of Indian Chest Society*.  
19 488 2014;31(3):221-7.
- 20 489 31. Miller J, Edwards LD, Agusti A, Bakke P, Calverley PMA, Celli B, et al. Comorbidity, systemic  
21 490 inflammation and outcomes in the ECLIPSE cohort. *Respiratory Medicine*. 2013;107(9):1376-84.
- 22 491 32. Divo M, Cote C, de Torres JP, Casanova C, Marin JM, Pinto-Plata V, et al. Comorbidities and  
23 492 Risk of Mortality in Patients with Chronic Obstructive Pulmonary Disease. *American Journal of*  
24 493 *Respiratory and Critical Care Medicine*. 2012;186(2):155-61.
- 25 494 33. Budweiser S, Harlacher M, Pfeifer M. Co-morbidities and hyperinflation are independent risk  
26 495 factors of all-cause mortality in very severe COPD. *COPD*. 2014;11(4):388-400.
- 27 496 34. Corsonello A, Pedone C, Corica F. Polypharmacy in elderly patients at discharge from the  
28 497 acute care hospital. *Therapeutics and Clinical Risk Management*. 2007;2007(3):1.
- 29 498 35. Guthrie B, Makubate B, Hernandez-Santiago V, Dreischulte T. The rising tide of  
30 499 polypharmacy and drug-drug interactions: population database analysis 1995-2010. *BMC Medicine*.  
31 500 2015;13:74.
- 32 501 36. Bourgeois FT, Shannon MW, Valim C, Mandl KD. Adverse drug events in the outpatient  
33 502 setting: an 11-year national analysis. *Pharmacoepidemiol Drug Saf*. 2010;19(9):901-10.
- 34 503 37. Johnell K, Klarin I. The relationship between number of drugs and potential drug-drug  
35 504 interactions in the elderly: a study of over 600,000 elderly patients from the Swedish Prescribed  
36 505 Drug Register. *Drug Saf*. 2007;30(10):911-8.
- 37 506 38. Pirmohamed M, James S, Meakin S, Green C, Scott AK, Walley TJ, et al. Adverse drug  
38 507 reactions as cause of admission to hospital: prospective analysis of 18 820 patients. *BMJ*.  
39 508 2004;329(7456):15-9.
- 40 509 39. Howard RL, Avery AJ, Slavenburg S, Royal S, Pipe G, Lucassen P, et al. Which drugs cause  
41 510 preventable admissions to hospital? A systematic review. *British Journal of Clinical Pharmacology*.  
42 511 2007;63(2):136-47.
- 43 512 40. Nobili A, Marengoni A, Tettamanti M, Salerno F, Pasina L, Franchi C, et al. Association  
44 513 between clusters of diseases and polypharmacy in hospitalized elderly patients: results from the  
45 514 REPOSI study. *European Journal of Internal Medicine*. 2011;22(6):597-602.
- 46 515 41. Franssen FM, Spruit MA, Wouters EF. Determinants of polypharmacy and compliance with  
47 516 GOLD guidelines in patients with chronic obstructive pulmonary disease. *Int J Chron Obstruct*  
48 517 *Pulmon Dis*. 2011;6:493-501.
- 49 518 42. Patel A. Extrapulmonary Polypharmacy and Cardiovascular Medications in COPD. *Thorax*.  
50 519 2009;64(Suppl IV):A5-A74.
- 51 520 43. Miller MR, Hankinson J, Brusasco V, Burgos F, Casaburi R, Coates A, et al. Standardisation of  
52 521 spirometry. *European Respiratory Journal*. 2005;26(2):319-38.

- 1  
2  
3 522 44. Qaseem A, Wilt TJ, Weinberger SE, Hanania NA, Criner G, van der Molen T, et al. Diagnosis  
4 523 and management of stable chronic obstructive pulmonary disease: a clinical practice guideline  
5 524 update from the American College of Physicians, American College of Chest Physicians, American  
6 525 Thoracic Society, and European Respiratory Society. *Annals of internal medicine*. 2011;155(3):179-  
7 526 91.
- 8 527 45. Global Strategy for the Diagnosis, Management and Prevention of COPD, Global Initiative for  
9 528 Chronic Obstructive Lung Disease (GOLD) 2017. [Available from: <http://goldcopd.org>]  
10 529 46. Hankinson JL, Odencrantz JR, Fedan KB. Spirometric reference values from a sample of the  
11 530 general U.S. population. *American Journal of Respiratory & Critical Care Medicine*. 1999;159(1):179-  
12 531 87.
- 13 532 47. Barnett K, Mercer SW, Norbury M, Watt G, Wyke S, Guthrie B. Epidemiology of  
14 533 Multimorbidity and Implications for Health Care, Research, and Medical Education: a Cross-Sectional  
15 534 Study. *Lancet*. 2012;380(9836):37-43.
- 16 535 48. Nicholl BI, Mackay D, Cullen B, Martin DJ, Ul-Haq Z, Mair FS, et al. Chronic multisite pain in  
17 536 major depression and bipolar disorder: cross-sectional study of 149,611 participants in UK Biobank.  
18 537 *BMC Psychiatry*. 2014;14:350.
- 19  
20 538 49. Scottish Government Model of Care Polypharmacy Working Group. Polypharmacy Guidance  
21 539 (2<sup>nd</sup> edition) March 2015. Scottish Government. [Available from:  
22 540 [http://www.sign.ac.uk/pdf/polypharmacy\\_guidance.pdf](http://www.sign.ac.uk/pdf/polypharmacy_guidance.pdf)]  
23 541 50. Fry A, Littlejohns TJ, Sudlow C, Doherty N, Allen NE. The representativeness of the UK  
24 542 Biobank cohort on a range of sociodemographic, physical, lifestyle and health-related characteristics.  
25 543 *Journal of epidemiology and community health*. 2016;70(Suppl 1):A26-A.
- 26 544 51. Putcha N, Han MK, Martinez CH, Foreman MG, Anzueto AR, Casaburi R, et al. Comorbidities  
27 545 of COPD have a major impact on clinical outcomes, particularly in African Americans. *Chronic*  
28 546 *obstructive pulmonary diseases (Miami, Fla)*. 2014;1(1):105-14.
- 29 547 52. Bhattacharyya P, Paul R, Ghosh M, Dey R, Dey R, Barooah N, et al. Prevalence of  
30 548 osteoporosis and osteopenia in advanced chronic obstructive pulmonary disease patients. *Lung India*  
31 549 *: official organ of Indian Chest Society*. 2011;28(3):184-6.
- 32 550 53. de Torres JP, Bastarrika G, Wisnivesky JP, Alcaide AB, Campo A, Seijo LM, et al. Assessing the  
33 551 relationship between lung cancer risk and emphysema detected on low-dose CT of the chest. *Chest*.  
34 552 2007;132(6):1932-8.
- 35 553 54. Diez-Manglano J, Barquero-Romero J, Mena PA, Recio-Iglesias J, Cabrera-Aguilar J, Lopez-  
36 554 Garcia F, et al. Polypharmacy in patients hospitalised for acute exacerbation of COPD. *European*  
37 555 *Respiratory Journal*. 2014;44(3):791-4.

556

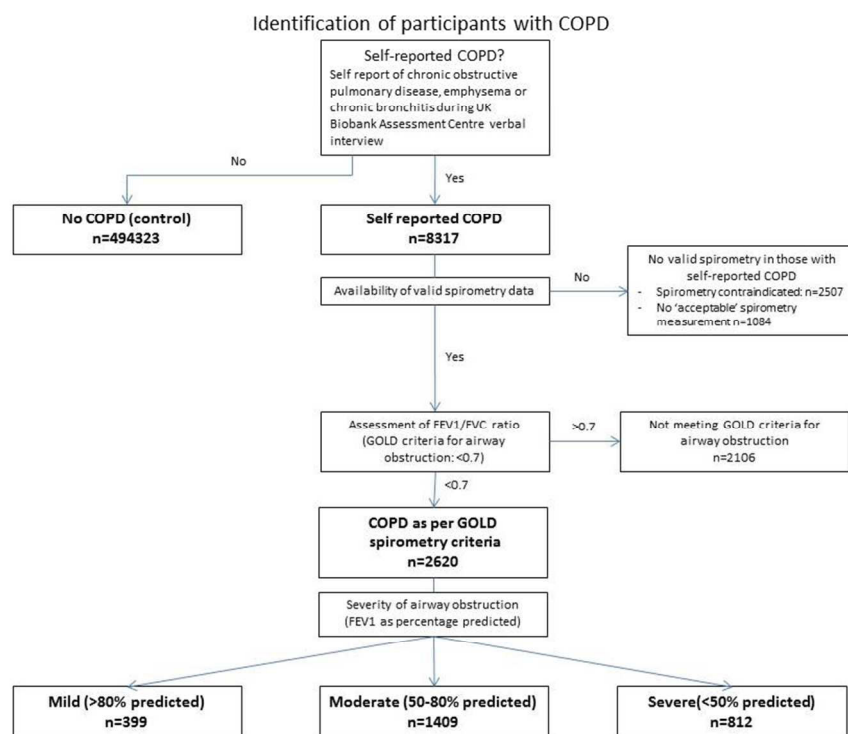

Identification of participants with self-report COPD and GOLD COPD

254x190mm (96 x 96 DPI)

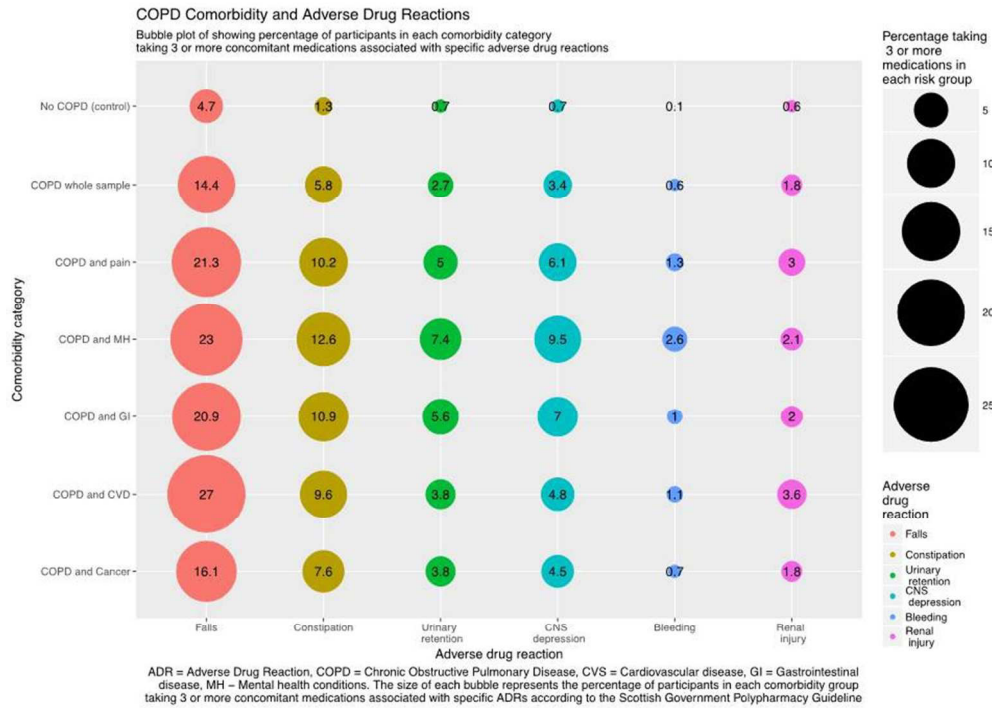

Bubble plot showing percentage of participants in each comorbidity category taking 3 or more concomitant medications associated with specific adverse drug reactions.

254x190mm (96 x 96 DPI)

| Comorbidity category (used in analysis) | Conditions included (as reported in table 2) | Self-reported conditions comprising this condition (UK Biobank variables used to identify self-reported conditions)                                                                                              |
|-----------------------------------------|----------------------------------------------|------------------------------------------------------------------------------------------------------------------------------------------------------------------------------------------------------------------|
| Cardiovascular conditions               | Hypertension                                 | Hypertension<br>Essential hypertension                                                                                                                                                                           |
|                                         | Coronary heart disease                       | Heart attack/MI<br>Angina                                                                                                                                                                                        |
|                                         | Diabetes                                     | Diabetic nephropathy<br>Diabetic neuropathy/ulcers<br>Diabetes<br>Type 1 diabetes<br>Type 2 diabetes<br>Diabetic eye disease                                                                                     |
|                                         | Stroke/TIA                                   | Stroke<br>TIA<br>Subarachnoid haemorrhage<br>Brain haemorrhage<br>Ischaemic stroke                                                                                                                               |
|                                         | Atrial fibrillation                          | Atrial fibrillation                                                                                                                                                                                              |
|                                         | Heart failure                                | Cardiomyopathy<br>Hypertrophic cardiomyopathy<br>Heart failure/pulmonary oedema                                                                                                                                  |
|                                         | Peripheral vascular disease                  | Peripheral vascular disease<br>Leg claudication/intermittent claudication                                                                                                                                        |
| Respiratory                             | COPD                                         | COPD/Chronic obstructive pulmonary disease<br>Emphysema/Chronic bronchitis<br>Emphysema                                                                                                                          |
|                                         | Asthma                                       | Asthma                                                                                                                                                                                                           |
|                                         | PE/DVT                                       | Deep vein thrombosis<br>Pulmonary embolism                                                                                                                                                                       |
|                                         | Bronchiectasis                               | Bronchiectasis                                                                                                                                                                                                   |
|                                         | Pulmonary fibrosis                           | Pulmonary fibrosis                                                                                                                                                                                               |
| Cancer                                  | Cancer                                       | "yes"/"no" to "have you ever had cancer?"                                                                                                                                                                        |
| Gastrointestinal                        | Dyspepsia                                    | Gastro-oesophageal reflux (GORD)<br>Oesophagitis/Barrett's oesophagus<br>Gastric stomach ulcers<br>Gastric erosions/gastritis<br>Duodenal ulcer<br>Dyspepsia/indigestion<br>Hiatus hernia<br>Helicobacter pylori |
|                                         | Diverticular disease                         | Diverticular disease/diverticulitis                                                                                                                                                                              |

|                    |                            |                                                                                                                                                                                                                                                                                                                                                                                                                  |
|--------------------|----------------------------|------------------------------------------------------------------------------------------------------------------------------------------------------------------------------------------------------------------------------------------------------------------------------------------------------------------------------------------------------------------------------------------------------------------|
|                    | Irritable bowel syndrome   | Irritable bowel syndrome                                                                                                                                                                                                                                                                                                                                                                                         |
|                    | Chronic liver disease      | Oesophageal varices<br>Non infective hepatitis<br>Liver failure/cirrhosis<br>Primary biliary cirrhosis                                                                                                                                                                                                                                                                                                           |
|                    | Inflammatory bowel disease | Inflammatory bowel disease<br>Crohn's disease<br>Ulcerative colitis                                                                                                                                                                                                                                                                                                                                              |
|                    | Constipation               | Constipation                                                                                                                                                                                                                                                                                                                                                                                                     |
|                    | Viral hepatitis            | Hepatitis B<br>Hepatitis C<br>Hepatitis D                                                                                                                                                                                                                                                                                                                                                                        |
| Mental Health      | Depression                 | Depression<br>Postnatal depression                                                                                                                                                                                                                                                                                                                                                                               |
|                    | Anxiety                    | Anxiety/panic attacks<br>Nervous breakdown<br>Post-traumatic stress disorder<br>Obsessive compulsive disorder<br>Stress<br>Insomnia<br>Psychological/psychiatric problem                                                                                                                                                                                                                                         |
|                    | Schizophrenia              | Schizophrenia                                                                                                                                                                                                                                                                                                                                                                                                    |
|                    | Bipolar                    | Mania<br>Bipolar disorder<br>Manic depression                                                                                                                                                                                                                                                                                                                                                                    |
| Painful conditions | Painful conditions         | Back pain<br>Joint pain<br>Headaches (not migraine)<br>Sciatica<br>Plantar fasciitis<br>Carpal tunnel syndrome<br>Fibromyalgia<br>Arthritis<br>Shingles<br>Disc problem<br>Prolapsed disc/slipped disc<br>Spine arthritis/spondylitis<br>Ankylosing spondylitis<br>Back problem<br>Osteoarthritis<br>Gout<br>Cervical spondylosis<br>Trigeminal neuralgia<br>Disc degeneration<br>Trapped nerve/compressed nerve |
| Other              | Osteoporosis               | Osteoporosis                                                                                                                                                                                                                                                                                                                                                                                                     |
|                    | Connective tissue disease  | Myositis/myopathy<br>Systemic lupus<br>erythematosus/SLE                                                                                                                                                                                                                                                                                                                                                         |

1  
2  
3  
4  
5  
6  
7  
8  
9  
10  
11  
12  
13  
14  
15  
16  
17  
18  
19  
20  
21  
22  
23  
24  
25  
26  
27  
28  
29  
30  
31  
32  
33  
34  
35  
36  
37  
38  
39  
40  
41  
42  
43  
44  
45  
46  
47  
48  
49  
50  
51  
52  
53  
54  
55  
56  
57  
58  
59  
60

|  |  |                                                                                                                                                                                                                                              |
|--|--|----------------------------------------------------------------------------------------------------------------------------------------------------------------------------------------------------------------------------------------------|
|  |  | Connective tissue disorder<br>Sjogren's syndrome sicca<br>syndrome<br>Dermatopolymyositis<br>Scleroderma/systemic<br>sclerosis<br>Rheumatoid arthritis<br>Psoriatic arthropathy<br>Dermatomyositis<br>Polymyositis<br>Polymyalgia rheumatica |
|--|--|----------------------------------------------------------------------------------------------------------------------------------------------------------------------------------------------------------------------------------------------|

For peer review only

| Drugs with cumulative risk of Adverse Drug Reactions* |                                                                                                                                                                                                                                                                                                                                                                                                                                                                                                                                                      |
|-------------------------------------------------------|------------------------------------------------------------------------------------------------------------------------------------------------------------------------------------------------------------------------------------------------------------------------------------------------------------------------------------------------------------------------------------------------------------------------------------------------------------------------------------------------------------------------------------------------------|
| Adverse Drug Reaction                                 | Contributing drug classes (participants taking 3 or more considered 'at risk' for the purposes of analysis)                                                                                                                                                                                                                                                                                                                                                                                                                                          |
| Falls                                                 | H2-receptor blockers<br>Loperamide<br>Prochlorperazine<br>Metoclopramide<br>ACE-inhibitor/Angiotensin receptor blocker<br>Thiazide diuretic<br>Loop diuretic<br>Amiloride/triamterene<br>Spironolactone<br>Beta-blocker<br>Calcium-channel blocker<br>Nitrates or nicorandil<br>Digoxin<br>Oral steroids<br>Opiates<br>Benzodiazepines<br>Sedative antihistamines<br>H1-receptor blockers<br>Antipsychotics<br>Tricyclic antidepressants<br>Sulfonylureas/gliptins/glinides<br>Pioglitazone<br>Urinary antispasmodics<br>Dosulepin<br>Alpha-blockers |
| Constipation                                          | H2-receptor blockers<br>Laxatives<br>Loperamide<br>Prochlorperazine<br>Thiazide diuretics<br>Loop diuretics<br>Calcium-channel blockers<br>Opiates<br>Sedative antihistamines<br>H1-receptor blockers<br>Antipsychotics<br>Tricyclic antidepressants<br>Urinary antispasmodics<br>Dosulepin                                                                                                                                                                                                                                                          |
| Urinary retention                                     | H2-receptor blockers<br>Loperamide<br>Prochlorperazine<br>Opiates<br>Sedative antihistamines<br>H1-receptor blockers<br>Antipsychotics<br>Tricyclic antidepressants                                                                                                                                                                                                                                                                                                                                                                                  |



|                                                                                                                                                                   |                                                                                                                                                                                                                                                |
|-------------------------------------------------------------------------------------------------------------------------------------------------------------------|------------------------------------------------------------------------------------------------------------------------------------------------------------------------------------------------------------------------------------------------|
|                                                                                                                                                                   | Urinary antispasmodics<br>Dosulepin                                                                                                                                                                                                            |
| CNS depression                                                                                                                                                    | H2-receptor blockers<br>Loperamide<br>Prochlorperazine<br>Oral steroids<br>Opiates<br>Benzodiazepines<br>Sedative antihistamines<br>H1-receptor blockers<br>Antipsychotics<br>Tricyclic antidepressants<br>Urinary antispasmodics<br>Dosulepin |
| Bleeding                                                                                                                                                          | Aspirin<br>Clopidogrel<br>Other antiplatelets<br>Oral steroids<br>SSRIs and related drugs<br>Non-steroidal anti-inflammatory drugs<br>Warfarin                                                                                                 |
| Renal injury                                                                                                                                                      | ACE-inhibitor/angiotensin receptor blockers<br>Thiazide diuretic<br>Loop diuretic<br>Amiloride/triamterene<br>Spironolactone<br>Antibiotics/antifungals<br>Non-steroidal anti-inflammatory drugs                                               |
| Adapted from <i>Scottish Government Model of Care Polypharmacy Working Group. Polypharmacy Guidance (2<sup>nd</sup> edition) March 2015. Scottish Government.</i> |                                                                                                                                                                                                                                                |

**Table S1. Odds ratios (with 95% CI) for the presence of categories of comorbidity**

| Comorbidity category     | Self-report COPD compared with no COPD<br>N=502,640 |                      | GOLD COPD compared with no COPD<br>N=496,943 |                      |
|--------------------------|-----------------------------------------------------|----------------------|----------------------------------------------|----------------------|
|                          | Model 1<br>N=502,013                                | Model 2<br>N=487,718 | Model 1<br>N=496,324                         | Model 2<br>N=482,378 |
|                          | OR (95% CI)                                         | OR (95% CI)          | OR (95% CI)                                  | OR (95% CI)          |
| Cardiovascular disease   | 1.45 (1.39-1.52) ***                                | 1.28 (1.22-1.34) *** | 1.11 (1.02-1.20) *                           | 1.08 (0.99-1.18) §   |
| Cancer                   | 1.29 (1.20-1.39) ***                                | 1.22 (1.13-1.31) *** | 1.12 (0.99-1.27) §                           | 1.06 (0.92-1.19) §   |
| Gastrointestinal disease | 1.76 (1.67-1.86) ***                                | 1.56 (1.48-1.65) *** | 1.4 (1.26-1.54) ***                          | 1.24 (1.12-1.38) *** |
| Mental health            | 2.02 (1.89-2.15) ***                                | 1.62 (1.51-1.73) *** | 1.75 (1.54-1.97) ***                         | 1.40 (1.22-1.58) *** |
| Painful conditions       | 1.54 (1.46-1.62) ***                                | 1.35 (1.28-1.42) *** | 1.31 (1.19-1.43) ***                         | 1.16 (1.06-1.28) **  |

§ : p>0.05 \* : p<0.05, \*\* : p<0.01, \*\*\* : p<0.001  
 Model 1: Adjusted for age, sex and socioeconomic status  
 Model 2: Adjusted for age, sex, socioeconomic status, smoking, alcohol frequency, body mass index and physical activity

**Table S2. Odds ratios (with 95% CI) for the presence of multimorbidity or polypharmacy**

| Outcome                        | Self-report COPD compared with no COPD<br>N=502,640 |                      | GOLD COPD compared with no COPD<br>N=496,943 |                      |
|--------------------------------|-----------------------------------------------------|----------------------|----------------------------------------------|----------------------|
|                                | Model 1<br>N=502,013                                | Model 2<br>N=487,718 | Model 1<br>N=496,324                         | Model 2<br>N=482,378 |
|                                | OR (95% CI)                                         | OR (95% CI)          | OR (95% CI)                                  | OR (95% CI)          |
| Multimorbidity (≥4 conditions) | 3.49 (3.28-3.70) ***                                | 2.79 (2.61-2.98) *** | 2.34 (2.10-2.63) ***                         | 1.99 (1.75-2.25) *** |
| Polypharmacy (≥5 medications)  | 3.85 (3.68-4.03) ***                                | 3.30 (3.15-3.46) *** | 3.47 (3.20-3.75) ***                         | 3.20 (2.95-3.48) *** |
| Polypharmacy (≥10 medications) | 5.72 (5.36-6.10) ***                                | 4.42 (4.11-4.75) *** | 4.20 (3.72-4.73) ***                         | 3.56 (3.12-4.05) *** |

§ : p>0.05 \* : p<0.05, \*\* : p<0.01, \*\*\* : p<0.001  
 Model 1: Adjusted for age, sex and socioeconomic status  
 Model 2: Adjusted for age, sex, socioeconomic status, smoking, alcohol frequency, body mass index and physical activity

**Table S3. Odds ratios (with 95% CI) for taking 3 of more medications associated with similar ADRs**

| ADR               | Self-report COPD compared with no COPD<br>N=502,640 |                      | GOLD COPD compared with no COPD<br>N=496,943 |                      |
|-------------------|-----------------------------------------------------|----------------------|----------------------------------------------|----------------------|
|                   | Model 1<br>N=502,013                                | Model 2<br>N=487,718 | Model 1<br>N=496,943                         | Model 2<br>N=482,378 |
|                   | OR (95% CI)                                         | OR (95% CI)          | OR (95% CI)                                  | OR (95% CI)          |
| Falls             | 2.27 (2.13 – 2.42) ***                              | 1.83 (1.71-1.96) *** | 1.66 (1.47 – 1.87) ***                       | 1.49 (1.30-1.69) *** |
| Constipation      | 2.71 (2.54 – 2.89) ***                              | 2.66 (2.39-2.96) *** | 2.18 (1.77 – 2.64) ***                       | 1.82 (1.47-2.24) *** |
| Urinary retention | 3.38 (2.94 – 3.87) ***                              | 2.59 (2.22-3.0) ***  | 1.98 (1.44 – 2.64) ***                       | 1.64 (1.18-2.21) **  |
| CNS Depression    | 3.75 (3.31 – 4.25) ***                              | 2.81 (2.45-3.22) *** | 2.29 (1.73 – 2.95) ***                       | 1.87 (1.40-2.43) *** |
| Bleeding          | 4.60 (3.35 – 6.19) ***                              | 3.39 (2.40-4.66) *** | 2.63 (1.25 – 4.80) **                        | 1.76 (0.75-3.48) §   |
| Renal injury      | 2.22 (1.86 – 2.62) ***                              | 1.84 (1.53-2.19) *** | 1.94 (1.41 – 2.58) ***                       | 1.84 (1.33-2.49) *** |

§ : p>0.05 \* : p<0.05, \*\* : p<0.01, \*\*\* : p<0.001  
 Model 1: Adjusted for age, sex and socioeconomic status  
 Model 2: Adjusted for age, sex, socioeconomic status, smoking, alcohol frequency, body mass index and physical activity

Subgroup analyses – comparing COPD with no COPD among participants with specific categories of comorbidity

**Table S4. Odds ratios (with 95% CI) for taking 3 of more medications associated with similar ADRs in participants with cardiovascular disease (CVD)**

| ADR               | Self-report COPD plus CVD compared with CVD alone (no COPD)<br>N=156,848 | GOLD COPD plus CVD compared with CVD alone (no COPD)<br>N=154,047 |
|-------------------|--------------------------------------------------------------------------|-------------------------------------------------------------------|
|                   | Model 1<br>N=156,667                                                     | Model 1<br>N=153,852                                              |
|                   | OR (95% CI)                                                              | OR (95% CI)                                                       |
| Falls             | 1.92 (1.79-2.07) ***                                                     | 1.59 (1.39-1.82) ***                                              |
| Constipation      | 2.89 (2.58-3.23) ***                                                     | 2.06 (1.63-2.57) ***                                              |
| Urinary retention | 2.78 (2.33-3.28) ***                                                     | 1.92 (1.30-2.72) ***                                              |
| CNS Depression    | 3.17 (2.71-3.69) ***                                                     | 2.17 (1.54-2.97) ***                                              |
| Bleeding          | 4.00 (2.85-5.48) ***                                                     | 2.26 (0.96-4.44) *                                                |
| Renal injury      | 1.90 (1.59-2.25) ***                                                     | 1.82 (1.31-2.45) ***                                              |

§ : p>0.05 \* : p<0.05, \*\* : p<0.01, \*\*\* : p<0.001  
Model 1: Adjusted for age, sex and socioeconomic status

**Table S5. Odds ratios (with 95% CI) for taking 3 of more medications associated with similar ADRs in participants with cancer**

| ADR               | Self-report COPD plus cancer compared with cancer alone (no COPD)<br>N=38,623 | GOLD COPD plus cancer compared with cancer alone (no COPD)<br>N=37,958 |
|-------------------|-------------------------------------------------------------------------------|------------------------------------------------------------------------|
|                   | Model 1<br>N=38,575                                                           | Model 1<br>N= 37,912                                                   |
|                   | OR (95% CI)                                                                   | OR (95% CI)                                                            |
| Falls             | 2.35 (1.95-2.81) ***                                                          | 1.49 (1.00-2.13) *                                                     |
| Constipation      | 3.55 (2.73-4.56) ***                                                          | 2.21 (1.22-3.68) **                                                    |
| Urinary retention | 3.65 (2.52-5.13) ***                                                          | 1.99 (0.78-4.14) §                                                     |
| CNS Depression    | 3.74 (2.66-5.14) ***                                                          | 2.04 (0.86-4.04) §                                                     |
| Bleeding          | 4.69 (1.91-9.86) ***                                                          | 2.20 (0.12-10.23) §                                                    |
| Renal injury      | 2.0 (1.17-3.20) **                                                            | 2.26 (0.89-4.71) §                                                     |

§ : p>0.05 \* : p<0.05, \*\* : p<0.01, \*\*\* : p<0.001  
Model 1: Adjusted for age, sex and socioeconomic status

**Table S6. Odds ratios (with 95% CI) for taking 3 of more medications associated with similar ADRs in participants with gastrointestinal disease (GI)**

| ADR               | Self-report COPD plus GI compared with GI alone (no COPD)<br>N=58372 | GOLD COPD plus GI compared with GI alone (no COPD)<br>N=57103 |
|-------------------|----------------------------------------------------------------------|---------------------------------------------------------------|
|                   | Model 1<br>N=58,299                                                  | Model 1<br>N=57,031                                           |
|                   | OR (95% CI)                                                          | OR (95% CI)                                                   |
| Falls             | 2.18 (1.92-2.46) ***                                                 | 1.46 (1.13-1.87) **                                           |
| Constipation      | 2.70 (2.29-3.16) ***                                                 | 1.58 (1.08-2.24) *                                            |
| Urinary retention | 2.64 (2.12-3.26) ***                                                 | 1.46 (0.83-2.37) §                                            |
| CNS Depression    | 3.02 (2.47-3.66) ***                                                 | 1.50 (0.88-2.37) §                                            |
| Bleeding          | 3.88 (2.27-6.25) ***                                                 | 3.18 (0.97-7.63) §                                            |
| Renal injury      | 1.99 (1.37-2.80) ***                                                 | 1.22 (0.48-2.51) §                                            |

§ : p>0.05 \* : p<0.05, \*\* : p<0.01, \*\*\* : p<0.001  
Model 1: Adjusted for age, sex and socioeconomic status

1  
2  
3  
4  
5  
6  
7  
8  
9  
10  
11  
12  
13  
14  
15  
16  
17  
18  
19  
20  
21  
22

| ADR               | Self-report COPD plus MH compared with MH alone (no COPD)<br>N=36,949 | GOLD COPD plus MH compared with MH alone (no COPD)<br>N=36126 |
|-------------------|-----------------------------------------------------------------------|---------------------------------------------------------------|
|                   | Model 1<br>N=36,885                                                   | Model 1<br>N=36,065                                           |
|                   | OR (95% CI)                                                           | OR (95% CI)                                                   |
| Falls             | 2.21 (1.90-2.56) ***                                                  | 1.35 (0.99-1.82) §                                            |
| Constipation      | 2.33 (1.93-2.81) ***                                                  | 1.62 (1.08-2.34) *                                            |
| Urinary retention | 2.17 (1.71-2.74) ***                                                  | 1.42 (0.82-2.29) §                                            |
| CNS Depression    | 2.53 (2.04-3.12) ***                                                  | 1.66 (1.03-2.54) *                                            |
| Bleeding          | 2.86 (1.77-4.17) ***                                                  | 1.94 (0.76-4.05) §                                            |
| Renal injury      | 1.86 (1.19-2.79) **                                                   | 1.27 (0.45-2.80) §                                            |

§ : p>0.05 \* : p<0.05, \*\* : p<0.01, \*\*\* : p<0.001  
Model 1: Adjusted for age, sex and socioeconomic status

23  
24  
25  
26  
27  
28  
29  
30  
31  
32  
33  
34  
35  
36  
37  
38  
39  
40  
41  
42  
43  
44  
45  
46  
47  
48  
49  
50  
51  
52  
53  
54  
55  
56  
57  
58  
59  
60

| ADR               | Self-report COPD plus painful conditions compared with painful conditions alone (no COPD)<br>N=83,992 | GOLD COPD plus painful conditions compared with painful conditions alone (no COPD)<br>N=82,388 |
|-------------------|-------------------------------------------------------------------------------------------------------|------------------------------------------------------------------------------------------------|
|                   | Model 1<br>N=83,895                                                                                   | Model 1<br>N=82,294                                                                            |
|                   | OR (95% CI)                                                                                           | OR (95% CI)                                                                                    |
| Falls             | 1.99 (1.79-2.21) ***                                                                                  | 1.52 (1.23-1.85) ***                                                                           |
| Constipation      | 2.57 (2.22-2.96) ***                                                                                  | 1.63 (1.19-2.20) **                                                                            |
| Urinary retention | 2.47 (2.01-3.00) ***                                                                                  | 1.19 (0.69-1.89) §                                                                             |
| CNS Depression    | 2.77 (2.30-3.31) ***                                                                                  | 1.48 (0.93-2.22) §                                                                             |
| Bleeding          | 4.23 (2.80-6.14) ***                                                                                  | 2.36 (0.84-5.20) §                                                                             |
| Renal injury      | 1.67 (1.29-2.13) ***                                                                                  | 1.46 (0.87-2.27) §                                                                             |

§ : p>0.05 \* : p<0.05, \*\* : p<0.01, \*\*\* : p<0.001  
Model 1: Adjusted for age, sex and socioeconomic status

**STROBE 2007 (v4) Statement—Checklist of items that should be included in reports of *cross-sectional studies***

| Section/Topic                | Item # | Recommendation                                                                                                                                                                       | Reported on page # |
|------------------------------|--------|--------------------------------------------------------------------------------------------------------------------------------------------------------------------------------------|--------------------|
| <b>Title and abstract</b>    | 1      | (a) Indicate the study’s design with a commonly used term in the title or the abstract                                                                                               | 2                  |
|                              |        | (b) Provide in the abstract an informative and balanced summary of what was done and what was found                                                                                  | 2,3                |
| <b>Introduction</b>          |        |                                                                                                                                                                                      |                    |
| Background/rationale         | 2      | Explain the scientific background and rationale for the investigation being reported                                                                                                 | 4                  |
| Objectives                   | 3      | State specific objectives, including any prespecified hypotheses                                                                                                                     | 5                  |
| <b>Methods</b>               |        |                                                                                                                                                                                      |                    |
| Study design                 | 4      | Present key elements of study design early in the paper                                                                                                                              | 5,6,9              |
| Setting                      | 5      | Describe the setting, locations, and relevant dates, including periods of recruitment, exposure, follow-up, and data collection                                                      | 6,7                |
| Participants                 | 6      | (a) Give the eligibility criteria, and the sources and methods of selection of participants                                                                                          | 7                  |
| Variables                    | 7      | Clearly define all outcomes, exposures, predictors, potential confounders, and effect modifiers. Give diagnostic criteria, if applicable                                             | 6-8                |
| Data sources/<br>measurement | 8*     | For each variable of interest, give sources of data and details of methods of assessment (measurement). Describe comparability of assessment methods if there is more than one group | 6-8                |
| Bias                         | 9      | Describe any efforts to address potential sources of bias                                                                                                                            | 14,15              |
| Study size                   | 10     | Explain how the study size was arrived at                                                                                                                                            | 7                  |
| Quantitative variables       | 11     | Explain how quantitative variables were handled in the analyses. If applicable, describe which groupings were chosen and why                                                         | 6,7,8,9            |
| Statistical methods          | 12     | (a) Describe all statistical methods, including those used to control for confounding                                                                                                | 8-10               |
|                              |        | (b) Describe any methods used to examine subgroups and interactions                                                                                                                  | 9,10               |
|                              |        | (c) Explain how missing data were addressed                                                                                                                                          | 10                 |
|                              |        | (d) If applicable, describe analytical methods taking account of sampling strategy                                                                                                   | n/a                |
|                              |        | (e) Describe any sensitivity analyses                                                                                                                                                | 9,10               |
| <b>Results</b>               |        |                                                                                                                                                                                      |                    |

|                          |     |                                                                                                                                                                                                              |                             |
|--------------------------|-----|--------------------------------------------------------------------------------------------------------------------------------------------------------------------------------------------------------------|-----------------------------|
| Participants             | 13* | (a) Report numbers of individuals at each stage of study—eg numbers potentially eligible, examined for eligibility, confirmed eligible, included in the study, completing follow-up, and analysed            | 11, figure 1                |
|                          |     | (b) Give reasons for non-participation at each stage                                                                                                                                                         | 11, Figure 1                |
|                          |     | (c) Consider use of a flow diagram                                                                                                                                                                           | Figure 1                    |
| Descriptive data         | 14* | (a) Give characteristics of study participants (eg demographic, clinical, social) and information on exposures and potential confounders                                                                     | Table 1                     |
|                          |     | (b) Indicate number of participants with missing data for each variable of interest                                                                                                                          | Table 1                     |
| Outcome data             | 15* | Report numbers of outcome events or summary measures                                                                                                                                                         | 11-13, figure 2, appendix 3 |
| Main results             | 16  | (a) Give unadjusted estimates and, if applicable, confounder-adjusted estimates and their precision (eg, 95% confidence interval). Make clear which confounders were adjusted for and why they were included | 11-13, figure 2, appendix 3 |
|                          |     | (b) Report category boundaries when continuous variables were categorized                                                                                                                                    | 12,13                       |
|                          |     | (c) If relevant, consider translating estimates of relative risk into absolute risk for a meaningful time period                                                                                             | n/a                         |
| Other analyses           | 17  | Report other analyses done—eg analyses of subgroups and interactions, and sensitivity analyses                                                                                                               | 12,13, Appendix 3,          |
| <b>Discussion</b>        |     |                                                                                                                                                                                                              |                             |
| Key results              | 18  | Summarise key results with reference to study objectives                                                                                                                                                     | 14                          |
| Limitations              | 19  | Discuss limitations of the study, taking into account sources of potential bias or imprecision. Discuss both direction and magnitude of any potential bias                                                   | 14,15                       |
| Interpretation           | 20  | Give a cautious overall interpretation of results considering objectives, limitations, multiplicity of analyses, results from similar studies, and other relevant evidence                                   | 15,16                       |
| Generalisability         | 21  | Discuss the generalisability (external validity) of the study results                                                                                                                                        | 15,16,17                    |
| <b>Other information</b> |     |                                                                                                                                                                                                              |                             |
| Funding                  | 22  | Give the source of funding and the role of the funders for the present study and, if applicable, for the original study on which the present article is based                                                | 17,18                       |

\*Give information separately for cases and controls in case-control studies and, if applicable, for exposed and unexposed groups in cohort and cross-sectional studies.

**Note:** An Explanation and Elaboration article discusses each checklist item and gives methodological background and published examples of transparent reporting. The STROBE checklist is best used in conjunction with this article (freely available on the Web sites of PLoS Medicine at <http://www.plosmedicine.org/>, Annals of Internal Medicine at <http://www.annals.org/>, and Epidemiology at <http://www.epidem.com/>). Information on the STROBE Initiative is available at [www.strobe-statement.org](http://www.strobe-statement.org).

# BMJ Open

## Examining Patterns of Multimorbidity, Polypharmacy and Risk of Adverse Drug Reactions in Chronic Obstructive Pulmonary Disease: A Cross-Sectional UK Biobank Study

|                                 |                                                                                                                                                                                                                                                                                                                                                                                                                                                                  |
|---------------------------------|------------------------------------------------------------------------------------------------------------------------------------------------------------------------------------------------------------------------------------------------------------------------------------------------------------------------------------------------------------------------------------------------------------------------------------------------------------------|
| Journal:                        | <i>BMJ Open</i>                                                                                                                                                                                                                                                                                                                                                                                                                                                  |
| Manuscript ID                   | bmjopen-2017-018404.R1                                                                                                                                                                                                                                                                                                                                                                                                                                           |
| Article Type:                   | Research                                                                                                                                                                                                                                                                                                                                                                                                                                                         |
| Date Submitted by the Author:   | 10-Oct-2017                                                                                                                                                                                                                                                                                                                                                                                                                                                      |
| Complete List of Authors:       | Hanlon, Peter; University of Glasgow Institute of Health and Wellbeing<br>Nicholl, Barbara; University of Glasgow, General Practice and Primary Care<br>Jani, Bhautesh; University of Glasgow<br>McQueenie, Ross; University of Glasgow, GPPC, School of Medicine,<br>Dentistry and Nursing, MVLS<br>Lee, Duncan; University of Glasgow<br>Gallacher, Katie I; University of Glasgow,<br>Mair, Frances; University of Glasgow, General Practice and Primary Care |
| <b>Primary Subject Heading</b>: | Respiratory medicine                                                                                                                                                                                                                                                                                                                                                                                                                                             |
| Secondary Subject Heading:      | General practice / Family practice                                                                                                                                                                                                                                                                                                                                                                                                                               |
| Keywords:                       | Multimorbidity, Polypharmacy, Chronic airways disease < THORACIC MEDICINE, Adverse events < THERAPEUTICS                                                                                                                                                                                                                                                                                                                                                         |
|                                 |                                                                                                                                                                                                                                                                                                                                                                                                                                                                  |

SCHOLARONE™  
Manuscripts

1  
2  
3  
4  
5  
6  
7  
8  
9  
10  
11  
12  
13  
14  
15  
16  
17  
18  
19  
20  
21  
22  
23  
24  
25  
26  
27  
28  
29  
30  
31  
32  
33  
34  
35  
36  
37  
38  
39  
40  
41  
42  
43  
44  
45  
46  
47  
48  
49  
50  
51  
52  
53  
54  
55  
56  
57  
58  
59  
60

1 **Examining Patterns of Multimorbidity, Polypharmacy and Risk of Adverse Drug Reactions in**

2 **Chronic Obstructive Pulmonary Disease: A Cross-Sectional UK Biobank Study**

3

4 **Corresponding author**

5 Professor Frances S Mair

6 General Practice and Primary Care, Institute of Health and Wellbeing, University of Glasgow, 1  
7 Horelethill Road, Glasgow, G12 9LX, Scotland, United Kingdom

8 Tel: +44 141 330 8317

9 E-mail: frances.mair@glasgow.ac.uk

10

11 **Authors:**

12 Peter Hanlon<sup>1</sup>, Barbara I. Nicholl<sup>1</sup>, Bhautesh Dinesh Jani<sup>1</sup>, Ross McQueenie<sup>1</sup>, Duncan Lee<sup>2</sup>, Katie I.

13 Gallacher<sup>1</sup>, Frances S Mair<sup>1</sup>

14 1. General Practice and Primary Care, Institute of Health and Wellbeing, University of Glasgow,  
15 1 Horselethill Road, Glasgow, G12 9LX, Scotland, United Kingdom

16 2. School of Mathematics and Statistics, The mathematics and Statistics Building, University of  
17 Glasgow, University Place, Glasgow, G12 8SQ

18

19

20 **Word count: 3446**



1  
2  
3 21 **Abstract**  
4

5  
6 22 **Objective:** This study aims: (1) to describe the pattern and extent of multimorbidity and  
7  
8 23 polypharmacy in UK Biobank participants with chronic obstructive pulmonary disease (COPD); and  
9  
10 24 (2) to identify which comorbidities are associated with increased risk of adverse drug reactions  
11  
12 25 (ADRs) resulting from polypharmacy.  
13

14  
15 26 **Design:** Cross-sectional.  
16

17  
18 27 **Setting:** Community cohort.  
19

20  
21 28 **Participants:** UK Biobank participants comparing self-reported COPD (n=8317) with no COPD  
22  
23 29 (n=494,323).  
24

25  
26 30 **Outcomes:** Multimorbidity ( $\geq$  four conditions) and polypharmacy ( $\geq$  five medications) in participants  
27  
28 31 with COPD versus those without. Risk of ADRs (taking  $\geq$  three medications associated with falls,  
29  
30 32 constipation, urinary retention, central nervous system (CNS) depression, bleeding or renal injury) in  
31  
32 33 relation to the presence of COPD and individual comorbidities.  
33

34  
35 34 **Results:** Multimorbidity was more common in participants with COPD than those without (17% vs.  
36  
37 35 4%). Polypharmacy was highly prevalent (52% with COPD taking  $\geq$  five medications vs 18% in those  
38  
39 36 without COPD). Adjusting for age, sex and socioeconomic status, those with COPD were significantly  
40  
41 37 more likely than those without to be prescribed  $\geq$ 3 medications contributing to falls (Odds ratio (OR)  
42  
43 38 2.27, 95% confidence interval (CI) 2.13 to 2.42), constipation (OR 3.42, 95% CI 3.10 to 3.77), urinary  
44  
45 39 retention (OR 3.38, 95% CI 2.94 to 3.87), CNS depression (OR: 3.75, 95% CI 3.31 to 4.25), bleeding  
46  
47 40 (OR 4.61, 95% CI 3.35 to 6.19) and renal injury (OR 2.22, 95% CI 1.86 to 2.62). Concomitant  
48  
49 41 cardiovascular disease was associated with the greatest risk of taking  $\geq$ 3 medications associated with  
50  
51 42 falls/renal injury. Concomitant mental health conditions were most strongly associated with  
52  
53 43 medications linked with CNS depression/urinary retention/bleeding.  
54

55  
56 44 **Conclusions:** Multimorbidity is common in COPD and associated with high levels of polypharmacy.  
57

58  
59 45 Co-prescription of drugs with various ADRs is common. Future research should examine the effects  
60

1  
2  
3 46 on healthcare outcomes of co-prescribing multiple drugs with similar potential ADRs. Clinical  
4  
5 47 guidelines should emphasise assessment of multimorbidity and ADR risk.  
6  
7  
8 48  
9  
10  
11 49  
12

13 50 **Abstract word count: 300**  
14  
15  
16 51  
17  
18  
19 52  
20  
21

### 22 53 **Strengths and Limitations**

- 25 54 • This paper assesses multimorbidity, polypharmacy and risk of adverse drug reactions are  
26  
27 55 assessed in UK Biobank participants with self-reported COPD compared with those without  
28  
29 56 COPD.  
30  
31 57 • Baseline variables from the UK Biobank assessment centre were used to adjust for potential  
32  
33 58 confounders.  
34  
35 59 • Cumulative risk of common adverse drug reactions was quantified by identifying UK Biobank  
36  
37 60 participants taking three or more medications associated with similar adverse drug  
38  
39 61 reactions.  
40  
41 62 • Analyses were repeated using a subgroup of participants with spirometry data confirming  
42  
43 63 airflow obstruction.  
44  
45 64 • Medication and comorbidity data rely on participant self-report, and may thus be  
46  
47 65 susceptible to bias or inaccuracy.  
48  
49  
50  
51 66  
52  
53 67

## 68 BACKGROUND

69 In people with Chronic Obstructive Pulmonary Disease (COPD), multimorbidity (the presence of two  
70 or more long-term conditions (LTCs)) is highly prevalent.(1-4) A recent meta-analysis of 29 datasets  
71 demonstrated that those with COPD are significantly more likely to be diagnosed with a range of  
72 cardiovascular comorbidities than those without COPD (we will use the term comorbidity when  
73 referring to specific conditions in addition to COPD, and multimorbidity to refer to the presence of  
74 two or more LTCs).(5) Other LTCs with known increased prevalence in COPD include obesity,(6)  
75 depression,(7-10) gastro-oesophageal reflux disease,(11-13) osteoporosis,(14-16) and lung  
76 cancer.(17, 18) Each of these conditions has been associated with poorer health related outcomes in  
77 COPD when compared to those with no comorbidity.(19-30) The overall burden of multimorbidity  
78 also impacts prognosis in COPD, for example higher number of comorbidities is associated with  
79 higher risk of mortality,(31) and higher burden of morbidity assessed using the Charlson index and  
80 the COPD-specific comorbidity test (COTE) is associated with higher risk of all-cause and respiratory  
81 specific mortality.(32, 33) The importance of considering the impact of multimorbidity in the  
82 management of long-term conditions is increasingly recognised, however an immature evidence  
83 base means that disease specific guidelines often lack specific recommendations with respect to  
84 multimorbidity.(34) The prevalence and prognostic significance of multimorbidity in COPD make it a  
85 potentially useful exemplar condition in which to consider the specific implications of different  
86 patterns of multimorbidity. Polypharmacy is one such implication.

87

88 Multimorbidity in the general population is associated with polypharmacy (often defined as  
89 concomitant use of  $\geq 5$  or  $\geq 10$  pharmacological agents).(35) Polypharmacy has been associated with  
90 increased risk of adverse drug reactions (ADRs)(36-38) and potentially preventable hospital  
91 admissions, particularly in the elderly.(39, 40) It has been demonstrated that diagnosis of COPD is  
92 associated with increased risk of polypharmacy.(41, 42) This is, in large measure, due to the high

1  
2  
3 93 burden of extra-pulmonary comorbidities.<sup>(43)</sup> However, little is known about the risk of ADRs in the  
4  
5 94 context of multimorbidity in COPD.  
6  
7  
8 95

9  
10 96 Given the well-established burden of multimorbidity and polypharmacy in COPD, it is likely that  
11  
12 97 those with COPD are at increased risk of ADRs resulting from polypharmacy. Previous analyses have  
13  
14 98 not focused on the risk of specific ADRs, or assessed which LTCs increase this risk, instead reporting  
15  
16 99 overall counts of prescribed medication. Data collected for the UK Biobank cohort offers an  
17  
18 100 opportunity to assess how multimorbidity in COPD relates to polypharmacy and to assess the  
19  
20 101 prevalence of co-prescription of medications with similar ADRs.  
21  
22  
23  
24 102

25  
26  
27 103 This paper aims:

- 28  
29  
30 104 • To describe the pattern and extent of multimorbidity and polypharmacy in UK Biobank  
31  
32 105 participants with COPD.  
33  
34 106 • To identify which LTCs in people with COPD are associated with increased risk of ADRs  
35  
36 107 resulting from polypharmacy.  
37  
38

39 108  
40  
41  
42  
43  
44  
45  
46  
47  
48  
49  
50  
51  
52  
53  
54  
55  
56  
57  
58  
59  
60

1  
2  
3 109 **METHODS**

4  
5  
6 110 **Data collection**

7  
8 111 The UK Biobank is a large, population cohort that recruited voluntary participants from throughout  
9  
10 112 the United Kingdom. Between 2006 and 2010, UK Biobank recruited 502,640 participants aged 37 to  
11  
12 113 73. Participants underwent baseline assessments at one of 22 assessment centres throughout  
13  
14 114 England, Scotland and Wales. Sociodemographic and lifestyle details were recorded using  
15  
16 115 touchscreen questionnaires. Townsend scores were derived from participant postcodes to provide  
17  
18 116 an area-based measure of socioeconomic deprivation. Self-reported LTCs, prescribed and over-the-  
19  
20 117 counter medications, smoking status (current, previous or never) and frequency of alcohol intake  
21  
22 118 (never / special occasions only, one-three times a month, at least once a week) were recorded from  
23  
24 119 a touchscreen questionnaire and subsequent verbal interview with a study nurse. Physical activity  
25  
26 120 was self-reported based on a questionnaire administered in the UK Biobank assessment centre  
27  
28 121 <http://biobank.ctsu.ox.ac.uk/crystal/field.cgi?id=6164>. We classified the responses into: none (no  
29  
30 122 physical activity in the last four weeks), low (light 'DIY' activity only in the last four weeks), medium  
31  
32 123 (heavy DIY and/or walking for pleasure and/or other exercises in the last four weeks), and high  
33  
34 124 (strenuous sports in the last four weeks).

35  
36  
37  
38 125 Study centre staff also collected physical measures including height and weight (to calculate body  
39  
40 126 mass index (BMI)) and spirometry. Spirometry was performed using a Vitalograph Pneumotrac 6800.  
41  
42 127 Individual reasons for contraindications to attempting spirometry were not recorded but, according  
43  
44 128 to protocol, these included chest infection in the last month, history of collapsed lung, and heart  
45  
46 129 attack or surgery in the past three months. Full details of the Biobank spirometry protocol are  
47  
48 130 available at <https://biobank.ctsu.ox.ac.uk/crystal/docs/Spirometry.pdf>. In brief, participants were  
49  
50 131 allowed up to three attempts to provide two reproducible spirometry measurements. Where the  
51  
52 132 reproducibility of the first two was deemed acceptable (<5% variation in both FEV1 and FVC) a third  
53  
54 133 measurement was not performed. All values were recorded along with any error messages  
55  
56  
57  
58  
59  
60

1  
2  
3 134 generated. As per the American Thoracic Society/European Respiratory Society (ATS/ERS) end-of-  
4  
5 135 test criteria, we interpreted as valid any measurement with no error message or if 'user accepted'  
6  
7 136 was specified.(44) No post-bronchodilator measurements were recorded, which deviates from the  
8  
9 137 ATS/ERS guidelines and the Global Initiative for Chronic Obstructive Lung Disease (GOLD) guidelines  
10  
11 138 for COPD.(45, 46)

12  
13  
14 139 Participants provided full informed consent to participate in UK Biobank and this study had full  
15  
16 140 ethical approval from the NHS National Research Ethics Service for UK Biobank studies (Ref  
17  
18 141 16/NW/0274); this study is part of UK Biobank approved project number 14151.  
19  
20

21 142

#### 22 23 24 143 **Defining COPD**

25  
26  
27 144 Participants reporting to have been diagnosed with chronic obstructive pulmonary disease, chronic  
28  
29 145 bronchitis, or emphysema at the nurse-led interview were coded as having 'self-reported COPD'.

30  
31  
32 146 Due to the potential inaccuracies of using self-reported diagnoses, we identified a subset of those  
33  
34 147 with self-reported COPD who met an adaptation of the Global Initiative for Obstructive Lung Disease  
35  
36 148 (GOLD) spirometry criteria for COPD.(46) This subset, referred to as 'GOLD COPD', was used as a  
37  
38 149 sensitivity analysis for self-reported COPD, and to stratify findings by severity of airflow obstruction.

39  
40 150 For participants with self-report COPD and valid spirometry measurements, we calculated the ratio  
41  
42 151 of forced expiratory volume in 1 second (FEV1) to forced vital capacity (FVC) using the highest  
43  
44 152 measurement for each participant meeting the American Thoracic Society/European Respiratory  
45  
46 153 Society end-of-test criteria.(44) Those with a FEV1/FVC ratio <0.7 were classed as having an  
47  
48 154 obstructive deficit and thus meeting the GOLD diagnostic criteria for COPD. We used the Hankinson  
49  
50 155 equation,(47) based on recorded age, sex and height, to calculate predicted FEV1 values for each  
51  
52 156 participant. Those with GOLD COPD were classified on the basis of their best available FEV1  
53  
54  
55  
56  
57  
58  
59  
60

1  
2  
3 157 measurement as having mild (>80% predicted FEV1), moderate (50-80% predicted FEV1), or severe  
4  
5 158 (<50% predicted FEV1) airflow obstruction in line with the GOLD COPD guidelines.(46)  
6  
7

8 159  
9

## 10 160 **Defining long term conditions and medications**

11  
12  
13 161 All LTCs were defined by self-report. The list of included LTCs was taken from a list of 42 morbidities  
14  
15 162 originally established for a large multimorbidity epidemiological study in Scotland, through  
16  
17 163 systematic review, the Quality and Outcomes Framework, NHS Scotland and an expert panel (48),  
18  
19 164 and subsequently amended for UK Biobank (49). The inclusion of 'other painful conditions'  
20  
21 165 comprised LTCs in which pain is a predominant feature (particularly as this is likely to influence  
22  
23 166 medication use). It should be noted that such a list is not exhaustive, but intended to cover common  
24  
25 167 conditions frequently requiring prescription of analgesics (e.g. osteoarthritis, back pain, headaches  
26  
27 168 etc.). Morbidities were categorised for the purposes of this analysis into cardiovascular disease,  
28  
29 169 gastrointestinal disease, mental health conditions, cancer, and painful conditions/inflammatory  
30  
31 170 arthropathies (comprising the list of 'other painful conditions' mentioned above, plus connective  
32  
33 171 tissue diseases). Full details of conditions comprising each category can be found in appendix 1.  
34  
35

36  
37 172 Medication data were collected by self-report. Medications were coded by mechanism of action  
38  
39 173 according to the British National Formulary (BNF) (e.g. Angiotensin-converting enzyme inhibitors,  
40  
41 174 beta-blockers, calcium channel blockers, etc.). For some situations where more than one medication  
42  
43 175 with a similar mechanism of action may be commonly co-prescribed (e.g. aspirin and clopidogrel,  
44  
45 176 both antiplatelets) these were coded separately. A complete list of the medications coded within  
46  
47 177 each class can be found in appendix 2.  
48  
49

50  
51 178 We defined those at risk of specific ADRs as anyone on 3 or more medications with similar potential  
52  
53 179 ADRs, based on information provided in the *Scottish Government Model of Care Polypharmacy*  
54  
55 180 *Working Group: Polypharmacy Guidance*.(50) This guideline cross-tabulates commonly prescribed  
56  
57  
58  
59  
60

1  
2  
3 181 medications with common ADRs to help identify those at cumulative risk of ADRs. This document  
4  
5 182 groups common medications by similar potential ADRs. While this list is not all-inclusive, and the cut-  
6  
7 183 off value of three or more medications is arbitrary, this does allow an estimation of the cumulative  
8  
9 184 risk of specific ADRs. We identified six potential ADRs (falls/fractures, constipation, urinary  
10  
11 185 retention, CNS depression, bleeding and renal injury) for which the proportion of participants taking  
12  
13 186 three or more associated medications could be assessed. It should be noted that several of these  
14  
15 187 event (e.g. falls/fractures, CNS depression) are often multifactorial, and medication may be a  
16  
17 188 contributing factor rather than a definitive cause. As the guideline acknowledges, however, these  
18  
19 189 are clinical events of which the risk is increased by taking multiple associated medications.  
20  
21  
22  
23  
24

#### 25 191 **Statistical analysis**

26  
27  
28 192 Study hypothesis was made an analyses planned prior to inspection of the data.  
29  
30

#### 31 193 **Baseline variables**

32  
33  
34 194 Comparisons were made between participants with self-reported COPD and the rest of the cohort  
35  
36 195 (who did not report COPD). Age, sex, smoking status, deprivation (Townsend score), BMI, physical  
37  
38 196 activity and frequency of alcohol intake were compared using  $\chi^2$  test for categorical variables,  $\chi^2$  test  
39  
40 197 for trend for ordinal variables, and Mann-Whitney-U test for continuous variables. Total number of  
41  
42 198 morbidities, prevalence of specific morbidities, number of self-reported prescribed medications, and  
43  
44 199 proportion of participants taking each class of medication (Appendix 2), were also compared  
45  
46 200 between those with self-reported COPD and the rest of the cohort. All comparisons were repeated  
47  
48 201 comparing participants with GOLD COPD only with those without COPD, stratifying by severity of  
49  
50 202 airflow obstruction.  
51  
52

#### 53 203 **Multimorbidity and polypharmacy**



1  
2  
3 204 Logistic regression analyses were used to compare participants with self-reported COPD and those  
4  
5 205 without COPD. Odds ratios (OR) and 95% confidence intervals (95% CI) were calculated for:

- 6  
7  
8 206 • the presence of cardiovascular disease, cancer, gastrointestinal disease, mental health  
9  
10 207 conditions and painful conditions/inflammatory arthropathies  
11  
12 208 • the presence of four or more morbidities (excluding COPD)  
13  
14 209 • the use of five or more, and 10 or more, medications (two separate models)  
15

16  
17 210 Models were initially adjusted for age, sex and socioeconomic deprivation (model 1), then adjusted  
18  
19 211 for the addition of smoking status, alcohol frequency, BMI and physical activity (model 2). These  
20  
21 212 analyses were repeated comparing those with GOLD COPD only to those without COPD.  
22

### 23 24 213 **Risk of ADRs**

25  
26  
27 214 For each potential ADR (falls/fractures, constipation, urinary retention, CNS depression, bleeding  
28  
29 215 and renal injury) participants taking three or more medications associated with that ADR were  
30  
31 216 identified. The following comparisons were then made:

- 32  
33  
34 217 • Unadjusted percentages at risk of each ADR were calculated for participants without COPD,  
35  
36 218 with self-reported COPD, and with self-reported COPD plus each category of LTC  
37  
38 219 (cardiovascular disease, cancer, gastrointestinal disease, mental health conditions and  
39  
40 220 painful conditions/inflammatory arthropathies) to give an impression of the ADR risk in  
41  
42 221 COPD, and identify LTCs in those with COPD that may increase this risk.  
43  
44 222 • ORs of being at risk of each ADR were calculated comparing those with self-reported COPD  
45  
46 223 to those without COPD adjusting for age, sex and socioeconomic deprivation (model 1) and  
47  
48 224 for age, sex, socioeconomic deprivation, smoking status, alcohol frequency, BMI and physical  
49  
50 225 activity (model 2).  
51  
52 226 • ORs of being at risk of each ADR were calculated comparing those with and without self-  
53  
54 227 reported COPD in each LTC category to (i.e. participants with cardiovascular disease alone  
55  
56  
57  
58  
59  
60

1  
2  
3 228 compared to participants with cardiovascular disease plus COPD, etc.). This was intended to  
4  
5 229 identify whether specific patterns of multimorbidity in COPD are associated with increased  
6  
7 230 ADR risk. Adjustment for a wide range of potential confounders was not appropriate in  
8  
9 231 these models due to the smaller number of participants in each model.

10  
11  
12 232 Each analysis was repeated comparing GOLD COPD only to those without COPD. Less than 3% of  
13  
14 233 participants (with or without COPD) had missing data for potential confounding variables (table 1).  
15  
16 234 Those with missing data were excluded from adjusted analyses. Spirometry data were missing for  
17  
18 235 3591 participants with self-report COPD (43%), hence the use of the GOLD COPD subset as a  
19  
20 236 sensitivity analysis.

21  
22  
23 237 All analyses were performed using R statistical software (version 3.3.1).  
24  
25

26 238  
27  
28

29 239  
30  
31  
32  
33  
34  
35  
36  
37  
38  
39  
40  
41  
42  
43  
44  
45  
46  
47  
48  
49  
50  
51  
52  
53  
54  
55  
56  
57  
58  
59  
60

1  
2  
3 240 **RESULTS**  
4

5  
6 241 At the time of recruitment, 8317 out of 502,619 participants reported having COPD (1.7%) and are  
7  
8 242 referred to here as the self-report COPD group. Of those who self-reported COPD, 4726 (57%) had  
9  
10 243 valid spirometry measurements. Spirometry was contraindicated or not available in 2507 of those  
11  
12 244 with self-reported COPD. Spirometry measurements did not meet the ATS/ESR end-of-test criteria in  
13  
14 245 1084 participants.(44) Of those with valid spirometry, 2620 (55%) met the GOLD criteria for airflow  
15  
16 246 obstruction (399 (15%) mild, 1409 (54%) moderate, 812 (31%) severe, see Figure 1) and are referred  
17  
18 247 to here as GOLD COPD.  
19

20  
21 248  
22

23  
24 249 **Baseline variables**  
25

26  
27 250 Table 1 describes and compares the characteristics of those with and without COPD in UK Biobank.  
28  
29 251 Participants with COPD (both self-report and GOLD) were significantly older, more socioeconomically  
30  
31 252 deprived, and less physically active. A higher proportion of those with COPD were male, obese and  
32  
33 253 had a history of smoking.  
34

35  
36 254  
37  
38  
39  
40  
41  
42  
43  
44  
45  
46  
47  
48  
49  
50  
51  
52  
53  
54  
55  
56  
57  
58  
59  
60

| Table 1. Baseline variables               |                          |      |                              |      |         |                             |      |         |
|-------------------------------------------|--------------------------|------|------------------------------|------|---------|-----------------------------|------|---------|
| Characteristic                            | No COPD<br>n=494323      |      | COPD (self-report)<br>n=8317 |      |         | GOLD GOPD<br>n=2620         |      |         |
|                                           | Count                    | %    | Count                        | %    | p-value | Count                       | %    | p-value |
| <b>Sex</b>                                |                          |      |                              |      |         |                             |      |         |
| Male                                      | 224906                   | 45.5 | 4268                         | 51.3 |         | 1426                        | 54.4 |         |
| Female                                    | 269417                   | 54.5 | 4049                         | 48.7 | <0.001  | 1194                        | 45.6 | <0.001  |
| <b>Age</b>                                | Median: 58<br>IQR: 50-63 |      | Median: 62<br>IQR: 57-66     |      | <0.001  | Median:<br>63<br>IQR: 59-66 |      | <0.001  |
| <b>Ethnicity</b>                          |                          |      |                              |      |         |                             |      |         |
| White                                     | 464770                   | 94.5 | 8052                         | 97.3 |         | 2620                        | 100  |         |
| Other                                     | 26821                    | 5.4  | 219                          | 2.6  | <0.001  | 0                           | 0    | <0.001  |
| Missing                                   | 2732                     |      | 46                           |      |         | 0                           | 0    |         |
| <b>Socioeconomic deprivation quintile</b> |                          |      |                              |      |         |                             |      |         |
| 1 (least deprived)                        | 99672                    | 20.2 | 1015                         | 12.2 |         | 309                         | 11.8 |         |
| 2                                         | 98977                    | 20.0 | 1142                         | 13.7 |         | 362                         | 13.8 |         |
| 3                                         | 99013                    | 20.1 | 1399                         | 16.8 |         | 440                         | 16.8 |         |
| 4                                         | 98660                    | 20.0 | 1735                         | 20.9 |         | 580                         | 22.2 |         |
| 5 (most deprived)                         | 98385                    | 19.7 | 3015                         | 36.3 | <0.001  | 926                         | 35.4 | <0.001  |
| Missing                                   | 616                      |      | 11                           |      |         | 3                           |      |         |
| <b>Smoking status</b>                     |                          |      |                              |      |         |                             |      |         |
| Current                                   | 50817                    | 10.3 | 2172                         | 26.3 |         | 833                         | 32.2 |         |
| Previous                                  | 169015                   | 34.4 | 4083                         | 49.5 |         | 1398                        | 54.0 |         |
| Never                                     | 271602                   | 55.3 | 1999                         | 24.2 | <0.001  | 360                         | 13.9 | <0.001  |
| Missing                                   | 2889                     |      | 63                           |      |         | 29                          |      |         |
| <b>Alcohol frequency</b>                  |                          |      |                              |      |         |                             |      |         |
| Daily                                     | 100070                   | 20.3 | 1720                         | 20.7 |         | 618                         | 23.6 |         |
| 3-4 times/week                            | 114058                   | 23.1 | 1404                         | 16.9 |         | 475                         | 18.2 |         |
| 1-2 times/week                            | 127459                   | 25.9 | 1863                         | 22.5 |         | 561                         | 21.5 |         |
| 1-3 times/month                           | 54979                    | 11.2 | 894                          | 10.8 |         | 289                         | 11.1 |         |
| Occasional                                | 56707                    | 11.5 | 1322                         | 15.9 |         | 387                         | 14.8 | <0.001  |
| Never                                     | 39569                    | 8.0  | 1092                         | 13.2 | <0.001  | 284                         | 10.9 |         |
| Missing                                   | 1481                     |      | 22                           |      |         | 6                           |      |         |
| <b>BMI</b>                                |                          |      |                              |      |         |                             |      |         |
| <18.5                                     | 2478                     | 0.5  | 148                          | 1.8  |         | 56                          | 2.2  |         |
| 18.5-24.9                                 | 155282                   | 31.8 | 2185                         | 26.8 |         | 829                         | 31.9 |         |
| 25.0-29.9                                 | 211102                   | 43.2 | 3165                         | 38.9 |         | 1049                        | 40.4 |         |
| >30                                       | 119813                   | 24.5 | 2647                         | 32.5 | <0.001  | 665                         | 25.6 | <0.001  |
| Missing                                   | 5648                     |      | 172                          |      |         | 21                          |      |         |
| <b>Physical activity</b>                  |                          |      |                              |      |         |                             |      |         |
| High                                      | 49827                    | 10.6 | 250                          | 3.1  |         | 70                          | 2.7  |         |
| Medium                                    | 387766                   | 79.6 | 5838                         | 72.0 |         | 1902                        | 73.3 |         |
| Low                                       | 18354                    | 3.8  | 589                          | 7.3  |         | 203                         | 7.8  |         |
| None                                      | 31425                    | 6.4  | 1433                         | 17.7 | <0.001  | 421                         | 16.2 | <0.001  |
| Missing                                   | 6951                     |      | 207                          |      |         | 24                          |      |         |
| <b>FEV1 (% predicted)</b>                 |                          |      |                              |      |         |                             |      |         |
| >80                                       | 272109                   | 78.0 | 1853                         | 39.2 |         | 399                         | 15.2 |         |
| 50-79                                     | 71727                    | 20.6 | 2022                         | 42.8 |         | 1409                        | 53.8 |         |
| <50                                       | 4841                     | 1.4  | 851                          | 18.0 | <0.001  | 812                         | 31.0 | <0.001  |
| Missing                                   | 145646                   |      | 3591                         |      |         | 1061                        |      |         |

255

1  
2  
3 **256 Multimorbidity and polypharmacy**  
4

5  
6 257 Prevalence of each category of comorbidity was higher in those with COPD than without (table 2).  
7  
8 258 After controlling for age, sex and socioeconomic status, those with self-reported COPD were  
9  
10 259 significantly more likely than those without to have each category of LTC examined: cardiovascular  
11  
12 260 disease (OR 1.45; 95% confidence interval (CI) 1.39 to 1.52) , cancer (1.29; 1.2 to 1.39),  
13  
14 261 gastrointestinal disease (1.76; 1.67 to 1.86) , mental health conditions (2.02; 1.89 to 2.15) , and  
15  
16 262 painful conditions (1.54; 1.46 to 1.62). Results for GOLD COPD also suggested higher likelihood of  
17  
18 263 each LTC compared to those without COPD, although the ORs were lower and results for cancer not  
19  
20 264 statistically significant (appendix 3). Results were similar after adjusting for additional confounders  
21  
22 265 (smoking status, alcohol frequency, BMI and physical activity) with the exception of cardiovascular  
23  
24 266 disease in GOLD COPD, which was no longer significantly associated (1.08; 0.99 to 1.18) (appendix 3).  
25  
26  
27 267  
28  
29  
30  
31  
32  
33  
34  
35  
36  
37  
38  
39  
40  
41  
42  
43  
44  
45  
46  
47  
48  
49  
50  
51  
52  
53  
54  
55  
56  
57  
58  
59  
60

| Table 2: Long Term Conditions in those with and without COPD    |                                  |                                            |                            |                            |                                 |                               |
|-----------------------------------------------------------------|----------------------------------|--------------------------------------------|----------------------------|----------------------------|---------------------------------|-------------------------------|
|                                                                 | Control<br>n=494323<br>count (%) | Self-report<br>COPD<br>n=8317<br>count (%) | GOLD COPD                  |                            |                                 |                               |
|                                                                 |                                  |                                            | All<br>n=2620<br>count (%) | Mild<br>n=399<br>count (%) | Moderate<br>n=1409<br>count (%) | Severe<br>n= 812<br>count (%) |
| <b>Total comorbidities (excluding COPD) <math>\geq 4</math></b> | 19959 (4.0)                      | 1389 (16.7)**                              | 331 (12.6)**               | 46 (11.5)                  | 191 (13.5)                      | 94 (11.6)                     |
| <b>Total number of medications <math>\geq 1</math></b>          | 356406 (72.1)                    | 7670 (92.2)**                              | 2452 (93.6)**              | 352 (88.2)                 | 1321 (93.8)                     | 779 (95.9)                    |
| $\geq 5$                                                        | 87286 (17.7)                     | 4312 (51.8)**                              | 1349 (51.5)**              | 171 (42.9)                 | 702 (49.8)                      | 476 (58.6)                    |
| $\geq 10$                                                       | 10678 (2.2)                      | 1269 (15.3)**                              | 329 (12.6)**               | 31 (7.8)                   | 172 (12.2)                      | 126 (15.5)                    |
| <b>Prevalence of comorbidities</b>                              |                                  |                                            |                            |                            |                                 |                               |
| <b>Cardiovascular</b>                                           | <b>152891 (30.9)</b>             | <b>3957 (47.6)**</b>                       | <b>1156 (44.1)**</b>       | <b>142 (35.6)</b>          | <b>611 (43.4)</b>               | <b>403 (49.6)</b>             |
| Hypertension                                                    | 130119 (26.3)                    | 3206 (38.5)**                              | 916 (35.0)**               | 112 (28.1)                 | 483 (34.3)                      | 321 (39.5)                    |
| CHD                                                             | 21560 (4.4)                      | 1171 (14.1)**                              | 315 (12.0)**               | 31 (7.6)                   | 185 (13.1)                      | 99 (12.2)                     |
| Diabetes                                                        | 24737 (5.0)                      | 766 (9.1)**                                | 189 (7.2)**                | 16 (4.0)                   | 109 (7.7)                       | 64 (7.9)                      |
| Stroke/TIA                                                      | 8459 (1.7)                       | 395 (4.7)**                                | 98 (3.7)**                 | 11 (2.8)                   | 51 (3.6)                        | 36 (4.4)                      |
| AF                                                              | 3552 (0.7)                       | 99 (1.2)**                                 | 34 (1.3)**                 | 3 (0.8)                    | 16 (1.1)                        | 15 (1.8)                      |
| Heart failure                                                   | 768 (0.2)                        | 35 (0.4)**                                 | 6 (0.2)                    | 0                          | 1 (0.1)                         | 5 (0.6)                       |
| <b>Respiratory</b>                                              |                                  |                                            |                            |                            |                                 |                               |
| Asthma                                                          | 55245 (11.2)                     | 3048 (36.6)**                              | 984 (37.6)**               | 142 (35)                   | 523 (37.1)                      | 319 (39.3)                    |
| PE/DVT                                                          | 12316 (2.5)                      | 554 (6.7)**                                | 139 (5.3)**                | 29 (7.3)                   | 71 (5.0)                        | 39 (4.8)                      |
| Bronchiectasis                                                  | 968 (0.2)                        | 167 (2.0)**                                | 39 (1.5)**                 | 7 (1.8)                    | 17 (1.2)                        | 15 (1.8)                      |
| Pulmonary fib.                                                  | 504 (0.1)                        | 67 (0.8)**                                 | 18 (0.7)**                 | 3 (0.8)                    | 12 (0.9)                        | 3 (0.4)                       |
| <b>Cancer</b>                                                   | <b>37686 (7.6)</b>               | <b>937 (11.3)</b>                          | <b>272 (10.4)</b>          | <b>47 (11.8)</b>           | <b>146 (10.4)</b>               | <b>79 (9.7)</b>               |
| Lung                                                            | 405 (0.1)                        | 52 (0.6)**                                 | 15 (0.6)**                 | 0                          | 7 (0.5)                         | 8 (1.0)                       |
| Breast                                                          | 11311 (2.3)                      | 210 (2.5)*                                 | 57 (2.2)                   | 12 (3.0)                   | 30 (2.1)                        | 15 (1.8)                      |
| Prostate                                                        | 3588 (0.7)                       | 105 (1.3)**                                | 30 (1.1)*                  | 5 (1.3)                    | 12 (0.9)                        | 13 (1.6)                      |
| GI                                                              | 2925 (0.6)                       | 96 (1.2)**                                 | 34 (1.3)**                 | 6 (1.5)                    | 19 (1.3)                        | 9 (1.1)                       |
| Haem                                                            | 6170 (1.2)                       | 124 (1.5)*                                 | 34 (1.3)                   | 5 (1.3)                    | 17 (1.2)                        | 12 (1.5)                      |
| <b>Gastrointestinal</b>                                         | <b>55635 (11.5)</b>              | <b>1737 (20.9)**</b>                       | <b>468 (17.9)**</b>        | <b>76 (19.0)</b>           | <b>254 (18.0)</b>               | <b>138 (17.0)</b>             |
| Dyspepsia                                                       | 37819 (7.7)                      | 1257 (15.1)**                              | 348 (13.3)**               | 53 (13.3)                  | 189 (13.4)                      | 106 (13.1)                    |
| Diverticular dis                                                | 5181 (1.0)                       | 224 (2.7)**                                | 54 (2.1)**                 | 6 (1.5)                    | 32 (2.3)                        | 16 (2.0)                      |
| IBS                                                             | 11203 (2.3)                      | 291 (3.5)**                                | 64 (2.4)**                 | 17 (4.3)                   | 35 (2.5)                        | 12 (1.5)                      |
| CLD                                                             | 935 (0.2)                        | 36 (0.4)**                                 | 10 (0.4)*                  | 2 (0.5)                    | 10 (0.7)                        | 3 (0.4)                       |
| <b>Mental Health</b>                                            | <b>35822 (7.2)</b>               | <b>1127 (13.6)**</b>                       | <b>304 (11.6)**</b>        | <b>54 (13.5)</b>           | <b>162 (11.5)</b>               | <b>88 (10.8)</b>              |
| Depression                                                      | 27578 (5.6)                      | 901 (10.8)**                               | 233 (8.9)**                | 42 (10.5)                  | 128 (9.1)                       | 63 (7.8)                      |
| Anxiety                                                         | 8781 (1.8)                       | 245 (2.9)**                                | 69 (2.6)**                 | 13 (3.3)                   | 36 (2.6)                        | 20 (2.5)                      |
| Schizophrenia/<br>bipolar                                       | 1918 (0.4)                       | 79 (0.9)**                                 | 27 (1.0)**                 | 3 (0.7)                    | 15 (1.1)                        | 9 (1.1)                       |
| <b>Other</b>                                                    |                                  |                                            |                            |                            |                                 |                               |
| Other painful                                                   | 81733 (16.5)                     | 2259 (27.2)**                              | 655 (25.0)**               | 115 (28.8)                 | 367 (26.0)                      | 173 (21.3)                    |
| Osteoporosis                                                    | 7700 (1.6)                       | 342 (4.1)**                                | 128 (4.9)**                | 21 (5.3)                   | 67 (4.8)                        | 40 (4.9)                      |
| Connective tissue<br>disease                                    | 10642 (2.2)                      | 391 (4.7)**                                | 112 (4.3)**                | 19 (4.8)                   | 72 (5.1)                        | 21 (2.6)                      |

Compared with control ( $\chi^2$ ): \* : p<0.05, \*\* : p<0.001

268

269

1  
2  
3 270 Morbidity counts (excluding COPD) and counts of prescribed medication are shown in table 2  
4  
5 271 comparing those with COPD, stratified by severity of airflow obstruction, with those without. Those  
6  
7 272 with COPD had higher numbers of LTCs and more prescribed medications than those without. There  
8  
9 273 was a trend towards more prescribed medications in those with greater severity of airway  
10  
11 274 obstruction. After controlling for age, sex and socioeconomic status, those with self- report COPD  
12  
13 275 were more likely to report  $\geq 4$  LTCs (3.49; 3.28 to 3.71),  $\geq 5$  medications (3.85; 3.68 to 4.03), and  $\geq 10$   
14  
15 276 medications (5.72; 5.36 to 6.10) than those without COPD. Results were similar for GOLD COPD and  
16  
17 277 remained statistically significant after adjusting for smoking status, alcohol frequency, BMI and  
18  
19 278 physical activity (appendix 3).

### 279 **ADR Risk**

25 280 Counts and percentages of participants taking specific medications are shown in appendix 4.  
26  
27 281 Participants with COPD (self-report and GOLD) were more likely than those without COPD to be  
28  
29 282 prescribed drugs across a range of disease areas, reflecting the range of LTCs present among those  
30  
31 283 with COPD. The percentages of participants within each category (no COPD, COPD, and COPD with  
32  
33 284 specific LTCs) taking three or more medications associated with a similar ADR is shown in Figure 2.  
34  
35 285 For each category of ADR a higher proportion of participants with COPD reported taking three or  
36  
37 286 more associated medications than those without COPD. This increased further with multimorbidity.  
38  
39 287 Participants with COPD plus cardiovascular disease had the highest percentage taking three or more  
40  
41 288 medications with a risk of falls or renal injury. Participants with COPD plus mental health conditions  
42  
43 289 had the highest percentages taking three or more medications with a risk of constipation, CNS  
44  
45 290 depression or bleeding.

46  
47  
48  
49 291

50  
51  
52 292 After adjusting for age, sex and socioeconomic deprivation, those with self-report COPD remained  
53  
54 293 more likely to be taking three or more medications in each category than those without COPD. These

294 findings remained statistically significant after adjusting for smoking status, alcohol frequency, BMI  
 295 and physical activity (Table 3). Findings were similar for GOLD COPD however, after adjusting for  
 296 additional potentially confounding variables, results for bleeding risk were not statistically significant  
 297 in this sensitivity analysis (Table 3).

**Table 3. Odds ratios (with 95% CI) for taking 3 of more medications associated with similar ADRs**

| ADR               | Self-report COPD compared with no COPD<br>N=502,640 |                      | GOLD COPD compared with no COPD<br>N=496,943 |                      |
|-------------------|-----------------------------------------------------|----------------------|----------------------------------------------|----------------------|
|                   | Model 1<br>N=502,013                                | Model 2<br>N=487,718 | Model 1<br>N=496,943                         | Model 2<br>N=482,378 |
|                   | OR (95% CI)                                         | OR (95% CI)          | OR (95% CI)                                  | OR (95% CI)          |
| Falls             | 2.27 (2.13 – 2.42) ***                              | 1.83 (1.71-1.96) *** | 1.66 (1.47 – 1.87) ***                       | 1.49 (1.30-1.69) *** |
| Constipation      | 2.71 (2.54 – 2.89) ***                              | 2.66 (2.39-2.96) *** | 2.18 (1.77 – 2.64) ***                       | 1.82 (1.47-2.24) *** |
| Urinary retention | 3.38 (2.94 – 3.87) ***                              | 2.59 (2.22-3.0) ***  | 1.98 (1.44 – 2.64) ***                       | 1.64 (1.18-2.21) **  |
| CNS depression    | 3.75 (3.31 – 4.25) ***                              | 2.81 (2.45-3.22) *** | 2.29 (1.73 – 2.95) ***                       | 1.87 (1.40-2.43) *** |
| Bleeding          | 4.60 (3.35 – 6.19) ***                              | 3.39 (2.40-4.66) *** | 2.63 (1.25 – 4.80) **                        | 1.76 (0.75-3.48) §   |
| Renal injury      | 2.22 (1.86 – 2.62) ***                              | 1.84 (1.53-2.19) *** | 1.94 (1.41 – 2.58) ***                       | 1.84 (1.33-2.49) *** |

§ : p>0.05 \* : p<0.05, \*\* : p<0.01, \*\*\* : p<0.001  
 Model 1: Adjusted for age, sex and socioeconomic status  
 Model 2: Adjusted for age, sex, socioeconomic status, smoking, alcohol frequency, body mass index and physical activity

298

299 Finally, each category of ADR risk was assessed in a subgroup analysis for each category of LTC  
 300 (cardiovascular, GI, cancer, mental health and painful conditions/inflammatory arthropathies)  
 301 comparing those with and without COPD (e.g. participants with cardiovascular disease plus COPD  
 302 compared with participants with cardiovascular disease alone, etc.). These models were adjusted for  
 303 age, sex and socioeconomic status only. Within each category of LTC, those with self-reported COPD  
 304 were more likely to be at risk of each ADR than those without COPD (appendix 3). Not all results  
 305 were statistically significant when using GOLD COPD (Appendix 3).

306

307

308

309

310



1  
2  
3 311 **DISCUSSION**  
4

5  
6 312 **Summary of main findings**  
7

8  
9 313 Multimorbidity and polypharmacy in COPD were common among UK Biobank participants. The  
10  
11 314 presence of multimorbidity was highly prevalent in those with COPD (85%). More than half reported  
12  
13 315 polypharmacy (five or more medications), and 15% reported 10 or more medications. The  
14  
15 316 prevalence of cardiovascular disease, as well as the degree of polypharmacy, was higher among  
16  
17 317 those with more severe airflow obstruction.

18  
19  
20 318 For the first time, our data demonstrates that those with COPD were more likely than those without  
21  
22 319 to be prescribed multiple medications ( $\geq$  three) with similar ADRs. Those with COPD plus  
23  
24 320 cardiovascular disease were most likely to be taking multiple medications associated with increased  
25  
26 321 risk of falls or renal injury, while those with COPD plus mental health conditions were most likely to  
27  
28 322 be taking medications predisposing to constipation, CNS depression and bleeding.(50) Within each  
29  
30 323 category of LTC, those with COPD were more likely to be taking multiple medications with similar  
31  
32 324 ADRs than those without. These associations between patterns of multimorbidity and specific ADR  
33  
34 325 risks have not been described or quantified previously.  
35  
36

37  
38 326

39  
40 327 **Strengths and limitations**  
41  
42

43 328 Strengths of this study include the large sample size with representation from different areas of the  
44  
45 329 UK. The range of data collected at UK Biobank assessment centres meant it was possible to compare  
46  
47 330 a range of sociodemographic characteristics as well as spirometry data, the latter being unusual for a  
48  
49 331 large community based cohort. It is recognised, however, that UK Biobank participants show some  
50  
51 332 evidence of 'healthy volunteer bias', differing from the UK average on a number of socioeconomic,  
52  
53 333 lifestyle and health-related measures. Specifically they are less socioeconomically deprived, less  
54  
55 334 likely to smoke, to be obese, and have fewer self-reported health conditions.(51) All LTC diagnoses  
56  
57

1  
2  
3 335 as well as medication data were self-reported, with no alternative means of verification. We  
4  
5 336 attempted to minimise this limitation by identifying a subset of those with COPD meeting the GOLD  
6  
7 337 diagnostic criteria and repeating the analyses with this subset. Importantly, spirometry values were  
8  
9 338 also pre-bronchodilator, which is in contravention to guidelines for diagnosing COPD. Additionally,  
10  
11 339 information was not available about the strength of indication for medications and individual  
12  
13 340 susceptibility to risk, which is a limitation when considering the risk of ADRs.

14  
15  
16 341 The use of the Scottish Government Polypharmacy Guideline allowed analysis of potential ADR risk  
17  
18 342 by specific common ADRs. The intended purpose of this guideline, however, was not to identify  
19  
20 343 potential risk from a population sample, but rather to identify potential causes of symptoms or  
21  
22 344 complications. The analysis in this study, therefore, serves only as an approximation of potential risk,  
23  
24 345 not an absolute marker of inappropriate polypharmacy. The cross-sectional nature of this analysis  
25  
26 346 also precludes an analysis of actual harm as a result of polypharmacy. Many of the potential ADRs,  
27  
28 347 such as falls and fractures and renal injury, and frequently multifactorial events and may not be  
29  
30 348 directly attributable to medication use. Despite these limitations, however, the co-prescription of  
31  
32 349 multiple medications with similar ADRs strongly implies greater potential for harm. The association  
33  
34 350 of such prescribing patterns with COPD, across a range of potential ADRs, is clear from our findings.  
35  
36 351 This analysis is, to the author's knowledge, the first to attempt to quantify this risk for specific ADRs  
37  
38 352 in this way.

39  
40  
41  
42 353

#### 43 44 45 354 **Context and implications**

46  
47  
48 355 The increased prevalence of individual LTCs such as coronary heart disease, hypertension, diabetes,  
49  
50 356 dyspepsia, osteoporosis, cancer, depression and anxiety in those with COPD is similar to the findings  
51  
52 357 from other population based studies of multimorbidity in COPD.(5, 11, 52-54) Our finding that  
53  
54 358 cardiovascular disease prevalence increased with increasing severity of COPD is in keeping with the

1  
2  
3 359 body of literature on cardiovascular disease and COPD, in which high prevalence has been observed  
4  
5 360 in (usually older) cohorts with severe airflow limitation.(5, 21) Greater polypharmacy with greater  
6  
7 361 severity of COPD has also been observed previously in older COPD populations,(42, 55) although  
8  
9 362 such analyses have been smaller (n=1859 and 398, respectively) and have not assessed the specific  
10  
11 363 patterns of prescribing in COPD. To the best of our knowledge, no previous studies have assessed  
12  
13 364 the risk of ADRs as a result of polypharmacy in COPD. A recent population-based analysis of  
14  
15 365 prescribing data from 310,000 adults in Scotland showed that over 15 years from 1995 to 2010 the  
16  
17 366 proportion of people with polypharmacy and with potentially serious drug-to-drug interactions  
18  
19 367 increased dramatically.(36) The number of prescribed medications was also associated with  
20  
21 368 increased risk of interactions. Our analysis differs in approach from this analysis, by seeking to  
22  
23 369 identify patterns of prescribing increasing risk of specific adverse events, rather than counting total  
24  
25 370 potential interactions. The strength of our approach lies in highlighting specific patterns of  
26  
27 371 multimorbidity in which specific ADRs are more likely. Our findings can therefore be applied to  
28  
29 372 clinical practice, highlighting the importance of recognising multimorbidity in COPD and being alert  
30  
31 373 to specific ADRs when prescribing medication.  
32  
33  
34  
35  
36  
37

38 375 Our findings indicate that in those with COPD the potential for ADRs as a result of combinations of  
39  
40 376 medications is high, and this appears to be the result of a high prevalence of extra-pulmonary LTCs.  
41  
42 377 Clinical guidelines for COPD should place greater emphasis on the need for assessment of associated  
43  
44 378 multimorbidity and the risk of associated ADRs. While our analysis shows potential areas where ADR  
45  
46 379 risk exists in COPD (e.g. falls in those with concomitant cardiovascular disease, CNS depression,  
47  
48 380 constipation with concomitant mental health conditions), future research is merited to assess what  
49  
50 381 actual harm could be attributed to such prescribing patterns.  
51  
52

## 53 382 **Conclusion**

54  
55  
56  
57  
58  
59  
60

1  
2  
3 383 Among UK Biobank participants with COPD there was considerable multimorbidity and  
4  
5 384 polypharmacy. Those with COPD were highly likely to be concurrently prescribed multiple  
6  
7 385 medications with similar potential adverse effects. Medications contributing to this risk were  
8  
9 386 largely indicated for the management of the associated morbidities rather than COPD. Future  
10  
11 387 research should examine the effects on healthcare outcomes of co-prescribing of multiple drugs  
12  
13 388 with similar potential of ADRs. Clinical guidelines for COPD should emphasise the need for  
14  
15 389 assessment of multimorbidity and the risk of associated ADRs.  
16  
17  
18  
19  
20

390

### 391 **Figure Legends**

392 **Figure 1:** Flow diagram of identification of participants with 'self-report COPD' and 'GOLD COPD'.

393 **Figure 2:** Bubble plot showing percentage of participants in each comorbidity category taking 3 or  
394 more concomitant medications associated with specific adverse drug reactions.

395

396

### 397 **Ethics approval and consent to participate**

398 Participants provided full informed consent to participate in UK Biobank and this study was covered  
399 by the generic ethical approval for UK Biobank studies from the NHS National Research Ethics  
400 Service (Ref 16/NW/0274).

401

### 402 **Availability of data and materials**

403 UK Biobank data is available via [www.ukbiobank.ac.uk](http://www.ukbiobank.ac.uk). Syntax for the generation of derived  
404 variables and for the analysis used for this study will be submitted to UK Biobank for record.

1  
2  
3 405  
4  
5

6 406 **Competing interests**

7  
8 407 The authors declare that they have no competing interests  
9  
10

11 408  
12  
13

14 409 **Funding**

15  
16  
17 410 This study was supported by a CSO Catalyst Grant CGA/16/39. BDJ was funded by a NHS Research for  
18

19 411 Scotland career research fellowship.  
20  
21

22 412 **Author contributions**

23  
24  
25 413 All authors (PH, BN, BJ, RM, DL, KG and FM) were involved in the conceptualisation and design of the  
26

27 414 project and interpretation of results. PH carried out the analysis with support from BJ, RM and BN.  
28

29 415 DL provided statistical support. All authors had access to the data. PH wrote the first draft of the  
30

31 416 paper and all authors commented on subsequent drafts. All authors approved the final draft for  
32

33 417 publication. FM is guarantor.  
34  
35

36 418  
37  
38

39 419 **Acknowledgements**

40  
41  
42 420 This research has been conducted using the UK Biobank Resource, approved project number 14151.  
43  
44

45 421  
46  
47

48 422  
49  
50

51 423  
52

53 424 **References**  
54  
55  
56  
57  
58  
59  
60

- 1  
2  
3 425 1. Anecchino C, Rossi E, Fanizza C, De Rosa M, Tognoni G, Romero M. Prevalence of chronic  
4 426 obstructive pulmonary disease and pattern of comorbidities in a general population. *International*  
5 427 *journal of chronic obstructive pulmonary disease*. 2007;2(4):567-74.
- 6 428 2. Fumagalli G, Fabiani F, Forte S, Napolitano M, Marinelli P, Palange P, et al. INDACO project: a  
7 429 pilot study on incidence of comorbidities in COPD patients referred to pneumology units.  
8 430 *Multidisciplinary Respiratory Medicine*. 2013;8.
- 9 431 3. Putcha N, Puhan MA, Hansel NN, Drummond MB, Boyd CM. Impact of co-morbidities on self-  
10 432 rated health in self-reported COPD: An analysis of NHANES 2001-2008. *Copd-Journal of Chronic*  
11 433 *Obstructive Pulmonary Disease*. 2013;10(3):324-32.
- 12 434 4. Garcia-Olmos L, Alberquilla A, Ayala V, Garcia-Sagredo P, Morales L, Carmona M, et al.  
13 435 Comorbidity in patients with chronic obstructive pulmonary disease in family practice: a cross  
14 436 sectional study. *BMC family practice*. 2013;14.
- 15 437 5. Chen W, Thomas J, Sadatsafavi M, FitzGerald JM. Risk of cardiovascular comorbidity in  
16 438 patients with chronic obstructive pulmonary disease: a systematic review and meta-analysis. *Lancet*  
17 439 *Respir Med*. 2015;3(8):631-9.
- 18 440 6. Rodriguez DA, Garcia-Aymerich J, Valera JL, Sauleda J, Togores B, Galdiz JB, et al.  
19 441 Determinants of exercise capacity in obese and non-obese COPD patients. *Respiratory Medicine*.  
20 442 2014;108(5):745-51.
- 21 443 7. Al-shair K, Dockry R, Mallia-Milanes B, Kolsum U, Singh D, Vestbo J. Depression and its  
22 444 relationship with poor exercise capacity, BODE index and muscle wasting in COPD. *Respiratory*  
23 445 *Medicine*. 2009;103(10):1572-9.
- 24 446 8. Di Marco F, Verga M, Reggente M, Casanova FM, Santus P, Blasi F, et al. Anxiety and  
25 447 depression in COPD patients: The roles of gender and disease severity. *Respiratory Medicine*.  
26 448 2006;100(10):1767-74.
- 27 449 9. Qian J, Simoni-Wastila L, Rattinger GB, Lehmann S, Langenberg P, Zuckerman IH, et al.  
28 450 Associations of depression diagnosis and antidepressant treatment with mortality among young and  
29 451 disabled Medicare beneficiaries with COPD. *General Hospital Psychiatry*. 2013;35(6):612-8.
- 30 452 10. Atlantis E, Fahey P, Cochrane B, Smith S. Bidirectional Associations Between Clinically  
31 453 Relevant Depression or Anxiety and COPD A Systematic Review and Meta-analysis. *Chest*.  
32 454 2013;144(3):766-77.
- 33 455 11. Bor S, Kitapcioglu G, Solak ZA, Ertlav M, Erdinc M. Prevalence of gastroesophageal reflux  
34 456 disease in patients with asthma and chronic obstructive pulmonary disease. *Journal of*  
35 457 *Gastroenterology and Hepatology*. 2010;25(2):309-13.
- 36 458 12. Garcia Rodriguez LA, Ruigomez A, Martin-Merino E, Johansson S, Wallander M-A.  
37 459 Relationship Between Gastroesophageal Reflux Disease and COPD in UK Primary Care. *Chest*.  
38 460 2008;134(6):1223-30.
- 39 461 13. Kim J, Lee JH, Kim Y, Kim K, Oh Y-M, Yoo KH, et al. Association between chronic obstructive  
40 462 pulmonary disease and gastroesophageal reflux disease: a national cross-sectional cohort study. *Bmc*  
41 463 *Pulmonary Medicine*. 2013;13.
- 42 464 14. Ferguson GT, Calverley PMA, Anderson JA, Jenkins CR, Jones PW, Willits LR, et al. Prevalence  
43 465 and Progression of Osteoporosis in Patients With COPD Results From the Towards a Revolution in  
44 466 COPD Health Study. *Chest*. 2009;136(6):1456-65.
- 45 467 15. Jorgensen NR, Schwarz P, Holme I, Henriksen BM, Petersen LJ, Backer V. The prevalence of  
46 468 osteoporosis in patients with chronic obstructive pulmonary disease - A cross sectional study.  
47 469 *Respiratory Medicine*. 2007;101(1):177-85.
- 48 470 16. Ogura-Tomomatsu H, Asano K, Tomomatsu K, Miyata J, Ohmori N, Kodama M, et al.  
49 471 Predictors of Osteoporosis and Vertebral Fractures in Patients Presenting with Moderate-to-Severe  
50 472 Chronic Obstructive Lung Disease. *Copd-Journal of Chronic Obstructive Pulmonary Disease*.  
51 473 2012;9(4):332-7.

17. Young RP, Hopkins RJ, Christmas T, Black PN, Metcalf P, Gamble GD. COPD prevalence is increased in lung cancer, independent of age, sex and smoking history. *European Respiratory Journal*. 2009;34(2):380-6.
18. Wilson DO, Weissfeld JL, Balkan A, Schragin JG, Fuhrman CR, Fisher SN, et al. Association of radiographic emphysema and airflow obstruction with lung cancer. *American Journal of Respiratory and Critical Care Medicine*. 2008;178(7):738-44.
19. Garcia-Rio F, Soriano JB, Miravittles M, Munoz L, Duran-Tauleria E, Sanchez G, et al. Impact of Obesity on the Clinical Profile of a Population-Based Sample with Chronic Obstructive Pulmonary Disease. *Plos One*. 2014;9(8).
20. Cecere LM, Littman AJ, Slatore CG, Udris EM, Bryson CL, Boyko EJ, et al. Obesity and COPD: Associated Symptoms, Health-related Quality of Life, and Medication Use. *Copd-Journal of Chronic Obstructive Pulmonary Disease*. 2011;8(4):275-84.
21. Mannino DM, Thorn D, Swensen A, Holguin F. Prevalence and outcomes of diabetes, hypertension and cardiovascular disease in COPD. *European Respiratory Journal*. 2008;32(4):962-9.
22. Curkendall SM, DeLuise C, Jones JK, Lanes S, Stang MR, Goehring E, et al. Cardiovascular disease in patients with chronic obstructive pulmonary disease, Saskatchewan Canada cardiovascular disease in COPD patients. *Annals of Epidemiology*. 2006;16(1):63-70.
23. McGarvey LP, John M, Anderson JA, Zvarich M, Wise RA. Ascertainment of cause-specific mortality in COPD: operations of the TORCH Clinical Endpoint Committee. *Thorax*. 2007;62(5):411-5.
24. Zielinski J, MacNee W, Wedzicha J, Ambrosino N, Braghiroli A, Dolensky J, et al. Causes of death in patients with COPD and chronic respiratory failure. *Monaldi archives for chest disease = Archivio Monaldi per le malattie del torace*. 1997;52(1):43-7.
25. Mannino DM, Doherty DE, Buist AS. Global Initiative on Obstructive Lung Disease (GOLD) classification of lung disease and mortality: findings from the Atherosclerosis Risk in Communities (ARIC) study. *Respiratory Medicine*. 2006;100(1):115-22.
26. Campo G, Guastaroba P, Marzocchi A, Santarelli A, Varani E, Vignali L, et al. Impact of COPD on Long-term Outcome After ST-Segment Elevation Myocardial Infarction Receiving Primary Percutaneous Coronary Intervention. *Chest*. 2013;144(3):750-7.
27. Konecny T, Somers K, Orban M, Koskino Y, Lennon RJ, Scanlon PD, et al. Interactions Between COPD and Outcomes After Percutaneous Coronary Intervention. *Chest*. 2010;138(3):621-7.
28. Sidney S, Sorel M, Quesenberry CP, DeLuise C, Lanes S, Eisner MD. COPD and incident cardiovascular disease hospitalizations and mortality: Kaiser permanente medical care program. *Chest*. 2005;128(4):2068-75.
29. Sakae TM, Menezes Pizzichini MM, Zimmermann Teixeira PJ, da Silva RM, Trevisol DJ, Pizzichini E. Exacerbations of COPD and symptoms of gastroesophageal reflux: a systematic review and meta-analysis. *Jornal Brasileiro De Pneumologia*. 2013;39(3):259-71.
30. Hattiholi J, Gaude GS. Prevalence and correlates of osteoporosis in chronic obstructive pulmonary disease patients in India. *Lung India : official organ of Indian Chest Society*. 2014;31(3):221-7.
31. Miller J, Edwards LD, Agusti A, Bakke P, Calverley PMA, Celli B, et al. Comorbidity, systemic inflammation and outcomes in the ECLIPSE cohort. *Respiratory Medicine*. 2013;107(9):1376-84.
32. Divo M, Cote C, de Torres JP, Casanova C, Marin JM, Pinto-Plata V, et al. Comorbidities and Risk of Mortality in Patients with Chronic Obstructive Pulmonary Disease. *American Journal of Respiratory and Critical Care Medicine*. 2012;186(2):155-61.
33. Budweiser S, Harlacher M, Pfeifer M. Co-morbidities and hyperinflation are independent risk factors of all-cause mortality in very severe COPD. *COPD*. 2014;11(4):388-400.
34. (NICE) NifHaCE. Multimorbidity: clinical assessment and management (NICE Guideline 56). 2016.
35. Corsonello A, Pedone C, Corica F. Polypharmacy in elderly patients at discharge from the acute care hospital. *Therapeutics and Clinical Risk Management*. 2007;2007(3):1.



- 1  
2  
3 524 36. Guthrie B, Makubate B, Hernandez-Santiago V, Dreischulte T. The rising tide of  
4 525 polypharmacy and drug-drug interactions: population database analysis 1995-2010. *BMC Medicine*.  
5 526 2015;13:74.
- 6 527 37. Bourgeois FT, Shannon MW, Valim C, Mandl KD. Adverse drug events in the outpatient  
7 528 setting: an 11-year national analysis. *Pharmacoepidemiol Drug Saf*. 2010;19(9):901-10.
- 8 529 38. Johnell K, Klarin I. The relationship between number of drugs and potential drug-drug  
9 530 interactions in the elderly: a study of over 600,000 elderly patients from the Swedish Prescribed  
10 531 Drug Register. *Drug Saf*. 2007;30(10):911-8.
- 11 532 39. Pirmohamed M, James S, Meakin S, Green C, Scott AK, Walley TJ, et al. Adverse drug  
12 533 reactions as cause of admission to hospital: prospective analysis of 18 820 patients. *BMJ*.  
13 534 2004;329(7456):15-9.
- 14 535 40. Howard RL, Avery AJ, Slavenburg S, Royal S, Pipe G, Lucassen P, et al. Which drugs cause  
15 536 preventable admissions to hospital? A systematic review. *British Journal of Clinical Pharmacology*.  
16 537 2007;63(2):136-47.
- 17 538 41. Nobili A, Marengoni A, Tettamanti M, Salerno F, Pasina L, Franchi C, et al. Association  
18 539 between clusters of diseases and polypharmacy in hospitalized elderly patients: results from the  
19 540 REPOSI study. *European Journal of Internal Medicine*. 2011;22(6):597-602.
- 20 541 42. Franssen FM, Spruit MA, Wouters EF. Determinants of polypharmacy and compliance with  
21 542 GOLD guidelines in patients with chronic obstructive pulmonary disease. *Int J Chron Obstruct*  
22 543 *Pulmon Dis*. 2011;6:493-501.
- 23 544 43. Patel A. Extrapulmonary Polypharmacy and Cardiovascular Medications in COPD. *Thorax*.  
24 545 2009;64(Suppl IV):A5-A74.
- 25 546 44. Miller MR, Hankinson J, Brusasco V, Burgos F, Casaburi R, Coates A, et al. Standardisation of  
26 547 spirometry. *European Respiratory Journal*. 2005;26(2):319-38.
- 27 548 45. Qaseem A, Wilt TJ, Weinberger SE, Hanania NA, Criner G, van der Molen T, et al. Diagnosis  
28 549 and management of stable chronic obstructive pulmonary disease: a clinical practice guideline  
29 550 update from the American College of Physicians, American College of Chest Physicians, American  
30 551 Thoracic Society, and European Respiratory Society. *Annals of internal medicine*. 2011;155(3):179-  
31 552 91.
- 32 553 46. (GOLD) GfCOLD. From the Global Strategy for the Diagnosis, Management and Prevention of  
33 554 COPD, Global Initiative for Chronic Obstructive Lung Disease (GOLD) 2017 2017 [Available from:  
34 555 Available from: <http://goldcopd.org>.
- 35 556 47. Hankinson JL, Odencrantz JR, Fedan KB. Spirometric reference values from a sample of the  
36 557 general U.S. population. *American Journal of Respiratory & Critical Care Medicine*. 1999;159(1):179-  
37 558 87.
- 38 559 48. Barnett K, Mercer SW, Norbury M, Watt G, Wyke S, Guthrie B. Epidemiology of  
39 560 Multimorbidity and Implications for Health Care, Research, and Medical Education: a Cross-Sectional  
40 561 Study. *Lancet*. 2012;380(9836):37-43.
- 41 562 49. Nicholl BI, Mackay D, Cullen B, Martin DJ, Ul-Haq Z, Mair FS, et al. Chronic multisite pain in  
42 563 major depression and bipolar disorder: cross-sectional study of 149,611 participants in UK Biobank  
43 564 1. *BMC Psychiatry*. 2014;14:350.
- 44 565 50. Group SGMoCPW. Polypharmacy Guidance (2nd edition). In: Government S, editor. 2015.
- 45 566 51. Fry A, Littlejohns TJ, Sudlow C, Doherty N, Allen NE. The representativeness of the UK  
46 567 Biobank cohort on a range of sociodemographic, physical, lifestyle and health-related characteristics.  
47 568 *Journal of epidemiology and community health*. 2016;70(Suppl 1):A26-A.
- 48 569 52. Putcha N, Han MK, Martinez CH, Foreman MG, Anzueto AR, Casaburi R, et al. Comorbidities  
49 570 of COPD have a major impact on clinical outcomes, particularly in African Americans. *Chronic*  
50 571 *obstructive pulmonary diseases (Miami, Fla)*. 2014;1(1):105-14.
- 51 572 53. Bhattacharyya P, Paul R, Ghosh M, Dey R, Dey R, Barooah N, et al. Prevalence of  
52 573 osteoporosis and osteopenia in advanced chronic obstructive pulmonary disease patients. *Lung India*  
53 574 : official organ of Indian Chest Society. 2011;28(3):184-6.



- 1  
2  
3 575 54. de Torres JP, Bastarrika G, Wisnivesky JP, Alcaide AB, Campo A, Seijo LM, et al. Assessing the  
4 576 relationship between lung cancer risk and emphysema detected on low-dose CT of the chest. *Chest*.  
5 577 2007;132(6):1932-8.  
6 578 55. Diez-Manglano J, Barquero-Romero J, Mena PA, Recio-Iglesias J, Cabrera-Aguilar J, Lopez-  
7 579 Garcia F, et al. Polypharmacy in patients hospitalised for acute exacerbation of COPD. *European*  
8 580 *Respiratory Journal*. 2014;44(3):791-4.

9  
10 581  
11  
12  
13  
14  
15  
16  
17  
18  
19  
20  
21  
22  
23  
24  
25  
26  
27  
28  
29  
30  
31  
32  
33  
34  
35  
36  
37  
38  
39  
40  
41  
42  
43  
44  
45  
46  
47  
48  
49  
50  
51  
52  
53  
54  
55  
56  
57  
58  
59  
60

For peer review only

1  
2  
3  
4  
5  
6  
7  
8  
9  
10  
11  
12  
13  
14  
15  
16  
17  
18  
19  
20  
21  
22  
23  
24  
25  
26  
27  
28  
29  
30  
31  
32  
33  
34  
35  
36  
37  
38  
39  
40  
41  
42  
43  
44  
45  
46  
47  
48  
49  
50  
51  
52  
53  
54  
55  
56  
57  
58  
59  
60

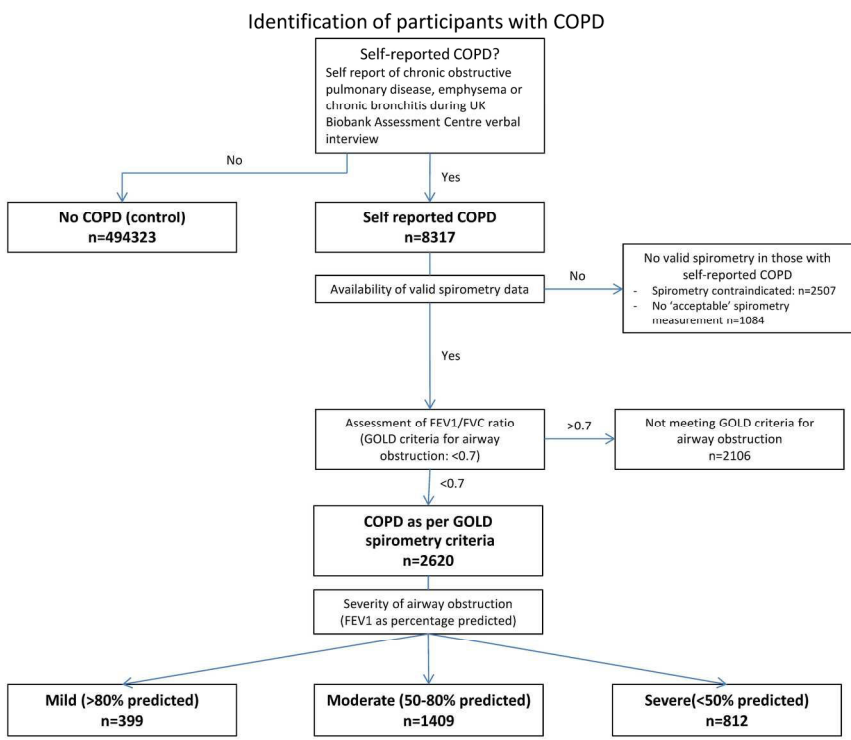

Flow diagram of identification of participants with 'self-report COPD' and 'GOLD COPD'.

190x142mm (300 x 300 DPI)

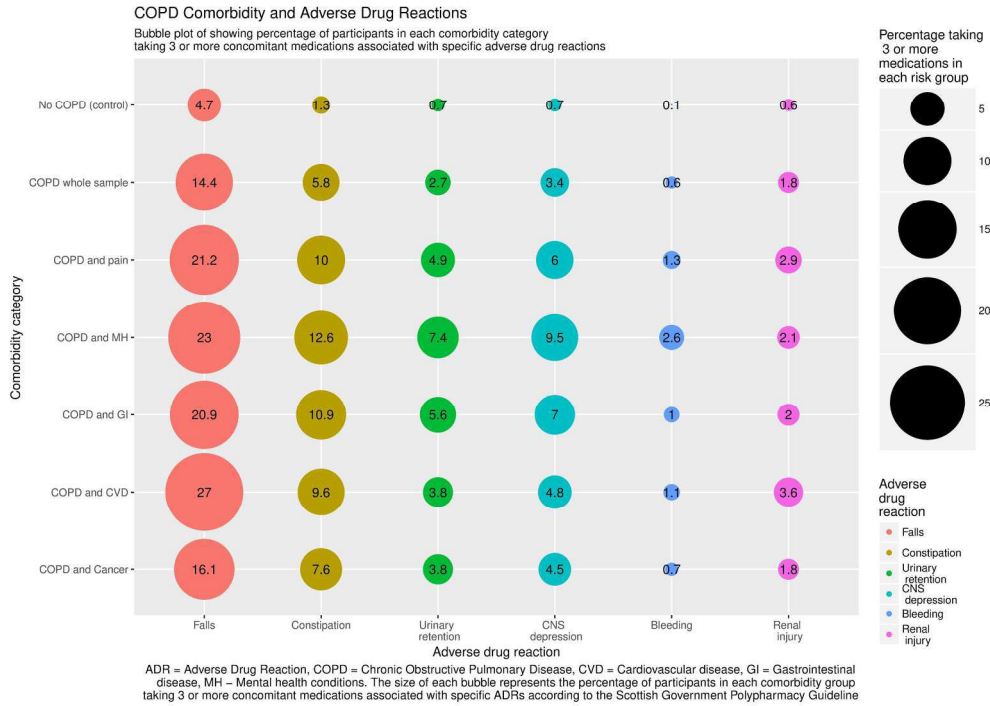

Bubble plot showing percentage of participants in each comorbidity category taking 3 or more concomitant medications associated with specific adverse drug reactions.

209x148mm (300 x 300 DPI)

| Comorbidity category (used in analysis) | Conditions included (as reported in table 2) | Self-reported conditions comprising this condition (UK Biobank variables used to identify self-reported conditions)                                                                                              |
|-----------------------------------------|----------------------------------------------|------------------------------------------------------------------------------------------------------------------------------------------------------------------------------------------------------------------|
| Cardiovascular conditions               | Hypertension                                 | Hypertension<br>Essential hypertension                                                                                                                                                                           |
|                                         | Coronary heart disease                       | Heart attack/MI<br>Angina                                                                                                                                                                                        |
|                                         | Diabetes                                     | Diabetic nephropathy<br>Diabetic neuropathy/ulcers<br>Diabetes<br>Type 1 diabetes<br>Type 2 diabetes<br>Diabetic eye disease                                                                                     |
|                                         | Stroke/TIA                                   | Stroke<br>TIA<br>Subarachnoid haemorrhage<br>Brain haemorrhage<br>Ischaemic stroke                                                                                                                               |
|                                         | Atrial fibrillation                          | Atrial fibrillation                                                                                                                                                                                              |
|                                         | Heart failure                                | Cardiomyopathy<br>Hypertrophic cardiomyopathy<br>Heart failure/pulmonary oedema                                                                                                                                  |
|                                         | Peripheral vascular disease                  | Peripheral vascular disease<br>Leg claudication/intermittent claudication                                                                                                                                        |
| Respiratory                             | COPD                                         | COPD/Chronic obstructive pulmonary disease<br>Emphysema/Chronic bronchitis<br>Emphysema                                                                                                                          |
|                                         | Asthma                                       | Asthma                                                                                                                                                                                                           |
|                                         | PE/DVT                                       | Deep vein thrombosis<br>Pulmonary embolism                                                                                                                                                                       |
|                                         | Bronchiectasis                               | Bronchiectasis                                                                                                                                                                                                   |
|                                         | Pulmonary fibrosis                           | Pulmonary fibrosis                                                                                                                                                                                               |
| Cancer                                  | Cancer                                       | "yes"/"no" to "have you ever had cancer?"                                                                                                                                                                        |
| Gastrointestinal                        | Dyspepsia                                    | Gastro-oesophageal reflux (GORD)<br>Oesophagitis/Barrett's oesophagus<br>Gastric stomach ulcers<br>Gastric erosions/gastritis<br>Duodenal ulcer<br>Dyspepsia/indigestion<br>Hiatus hernia<br>Helicobacter pylori |
|                                         | Diverticular disease                         | Diverticular disease/diverticulitis                                                                                                                                                                              |

|                    |                            |                                                                                                                                                                                                                                                                                                 |
|--------------------|----------------------------|-------------------------------------------------------------------------------------------------------------------------------------------------------------------------------------------------------------------------------------------------------------------------------------------------|
|                    | Irritable bowel syndrome   | Irritable bowel syndrome                                                                                                                                                                                                                                                                        |
|                    | Chronic liver disease      | Oesophageal varices<br>Non infective hepatitis<br>Liver failure/cirrhosis<br>Primary biliary cirrhosis                                                                                                                                                                                          |
|                    | Inflammatory bowel disease | Inflammatory bowel disease<br>Crohn's disease<br>Ulcerative colitis                                                                                                                                                                                                                             |
|                    | Constipation               | Constipation                                                                                                                                                                                                                                                                                    |
|                    | Viral hepatitis            | Hepatitis B<br>Hepatitis C<br>Hepatitis D                                                                                                                                                                                                                                                       |
| Mental Health      | Depression                 | Depression<br>Postnatal depression                                                                                                                                                                                                                                                              |
|                    | Anxiety                    | Anxiety/panic attacks<br>Nervous breakdown<br>Post-traumatic stress disorder<br>Obsessive compulsive disorder<br>Stress<br>Insomnia<br>Psychological/psychiatric problem                                                                                                                        |
|                    | Schizophrenia              | Schizophrenia                                                                                                                                                                                                                                                                                   |
|                    | Bipolar                    | Mania<br>Bipolar disorder<br>Manic depression                                                                                                                                                                                                                                                   |
| Painful conditions | Connective tissue diseases | Myositis/myopathy<br>Systemic lupus erythematosus/SLE<br>Connective tissue disorder<br>Sjogren's syndrome.sicca syndrome<br>Dermatopolymyositis<br>Scleroderma/systemic sclerosis<br>Rheumatoid arthritis<br>Psoriatic arthropathy<br>Dermatomyositis<br>Polymyositis<br>Polymyalgia rheumatica |
|                    | Other painful conditions   | Back pain<br>Joint pain<br>Headaches (not migraine)<br>Sciatica<br>Plantar fasciitis<br>Carpal tunnel syndrome<br>Fibromyalgia<br>Arthritis<br>Shingles<br>Disc problem<br>Prolapsed disc/slipped disc                                                                                          |

1  
2  
3  
4  
5  
6  
7  
8  
9  
10  
11  
12  
13  
14  
15  
16  
17  
18  
19  
20  
21  
22  
23  
24  
25  
26  
27  
28  
29  
30  
31  
32  
33  
34  
35  
36  
37  
38  
39  
40  
41  
42  
43  
44  
45  
46  
47  
48  
49  
50  
51  
52  
53  
54  
55  
56  
57  
58  
59  
60

|       |              |                                                                                                                                                                                                        |
|-------|--------------|--------------------------------------------------------------------------------------------------------------------------------------------------------------------------------------------------------|
|       |              | Spine arthritis/spondylitis<br>Ankylosing spondylitis<br>Back problem<br>Osteoarthritis<br>Gout<br>Cervical spondylosis<br>Trigeminal neuralgia<br>Disc degeneration<br>Trapped nerve/compressed nerve |
| Other | Osteoporosis | Osteoporosis                                                                                                                                                                                           |

For peer review only

| Drugs with cumulative risk of Adverse Drug Reactions* |                                                                                                                                                                                                                                                                                                                                                                                                                                                                                                                                                      |
|-------------------------------------------------------|------------------------------------------------------------------------------------------------------------------------------------------------------------------------------------------------------------------------------------------------------------------------------------------------------------------------------------------------------------------------------------------------------------------------------------------------------------------------------------------------------------------------------------------------------|
| Adverse Drug Reaction                                 | Contributing drug classes (participants taking 3 or more considered 'at risk' for the purposes of analysis)                                                                                                                                                                                                                                                                                                                                                                                                                                          |
| Falls                                                 | H2-receptor blockers<br>Loperamide<br>Prochlorperazine<br>Metoclopramide<br>ACE-inhibitor/Angiotensin receptor blocker<br>Thiazide diuretic<br>Loop diuretic<br>Amiloride/triamterene<br>Spironolactone<br>Beta-blocker<br>Calcium-channel blocker<br>Nitrates or nicorandil<br>Digoxin<br>Oral steroids<br>Opiates<br>Benzodiazepines<br>Sedative antihistamines<br>H1-receptor blockers<br>Antipsychotics<br>Tricyclic antidepressants<br>Sulfonylureas/gliptins/glinides<br>Pioglitazone<br>Urinary antispasmodics<br>Dosulepin<br>Alpha-blockers |
| Constipation                                          | H2-receptor blockers<br>Laxatives<br>Loperamide<br>Prochlorperazine<br>Thiazide diuretics<br>Loop diuretics<br>Calcium-channel blockers<br>Opiates<br>Sedative antihistamines<br>H1-receptor blockers<br>Antipsychotics<br>Tricyclic antidepressants<br>Urinary antispasmodics<br>Dosulepin                                                                                                                                                                                                                                                          |
| Urinary retention                                     | H2-receptor blockers<br>Loperamide<br>Prochlorperazine<br>Opiates<br>Sedative antihistamines<br>H1-receptor blockers<br>Antipsychotics<br>Tricyclic antidepressants                                                                                                                                                                                                                                                                                                                                                                                  |

|                                                                                                                                                                   |                                                                                                                                                                                                                                                |
|-------------------------------------------------------------------------------------------------------------------------------------------------------------------|------------------------------------------------------------------------------------------------------------------------------------------------------------------------------------------------------------------------------------------------|
|                                                                                                                                                                   | Urinary antispasmodics<br>Dosulepin                                                                                                                                                                                                            |
| CNS depression                                                                                                                                                    | H2-receptor blockers<br>Loperamide<br>Prochlorperazine<br>Oral steroids<br>Opiates<br>Benzodiazepines<br>Sedative antihistamines<br>H1-receptor blockers<br>Antipsychotics<br>Tricyclic antidepressants<br>Urinary antispasmodics<br>Dosulepin |
| Bleeding                                                                                                                                                          | Aspirin<br>Clopidogrel<br>Other antiplatelets<br>Oral steroids<br>SSRIs and related drugs<br>Non-steroidal anti-inflammatory drugs<br>Warfarin                                                                                                 |
| Renal injury                                                                                                                                                      | ACE-inhibitor/angiotensin receptor blockers<br>Thiazide diuretic<br>Loop diuretic<br>Amiloride/triamterene<br>Spironolactone<br>Antibiotics/antifungals<br>Non-steroidal anti-inflammatory drugs                                               |
| Adapted from <i>Scottish Government Model of Care Polypharmacy Working Group. Polypharmacy Guidance (2<sup>nd</sup> edition) March 2015. Scottish Government.</i> |                                                                                                                                                                                                                                                |



1  
2  
3  
4  
5  
6  
7  
8  
9  
10  
11  
12  
13  
14  
15  
16  
17  
18  
19  
20

| Comorbidity category     | Self-report COPD compared with no COPD<br>N=502,640 |                      | GOLD COPD compared with no COPD<br>N=496,943 |                      |
|--------------------------|-----------------------------------------------------|----------------------|----------------------------------------------|----------------------|
|                          | Model 1<br>N=502,013                                | Model 2<br>N=487,718 | Model 1<br>N=496,324                         | Model 2<br>N=482,378 |
|                          | OR (95% CI)                                         | OR (95% CI)          | OR (95% CI)                                  | OR (95% CI)          |
| Cardiovascular disease   | 1.45 (1.39-1.52) ***                                | 1.28 (1.22-1.34) *** | 1.11 (1.02-1.20) *                           | 1.08 (0.99-1.18) §   |
| Cancer                   | 1.29 (1.20-1.39) ***                                | 1.22 (1.13-1.31) *** | 1.12 (0.99-1.27) §                           | 1.06 (0.92-1.19) §   |
| Gastrointestinal disease | 1.76 (1.67-1.86) ***                                | 1.56 (1.48-1.65) *** | 1.4 (1.26-1.54) ***                          | 1.24 (1.12-1.38) *** |
| Mental health            | 2.02 (1.89-2.15) ***                                | 1.62 (1.51-1.73) *** | 1.75 (1.54-1.97) ***                         | 1.40 (1.22-1.58) *** |
| Painful conditions       | 1.62 (1.55-1.70) ***                                | 1.41 (1.34-1.48) *** | 1.40 (1.28-1.52) ***                         | 1.24 (1.13-1.35) **  |

§ : p>0.05 \* : p<0.05, \*\* : p<0.01, \*\*\* : p<0.001  
 Model 1: Adjusted for age, sex and socioeconomic status  
 Model 2: Adjusted for age, sex, socioeconomic status, smoking, alcohol frequency, body mass index and physical activity

21  
22  
23  
24  
25  
26  
27  
28  
29  
30  
31  
32  
33  
34  
35  
36

| Outcome                        | Self-report COPD compared with no COPD<br>N=502,640 |                      | GOLD COPD compared with no COPD<br>N=496,943 |                      |
|--------------------------------|-----------------------------------------------------|----------------------|----------------------------------------------|----------------------|
|                                | Model 1<br>N=502,013                                | Model 2<br>N=487,718 | Model 1<br>N=496,324                         | Model 2<br>N=482,378 |
|                                | OR (95% CI)                                         | OR (95% CI)          | OR (95% CI)                                  | OR (95% CI)          |
| Multimorbidity (≥4 conditions) | 3.49 (3.28-3.70) ***                                | 2.79 (2.61-2.98) *** | 2.34 (2.10-2.63) ***                         | 1.99 (1.75-2.25) *** |
| Polypharmacy (≥5 medications)  | 3.85 (3.68-4.03) ***                                | 3.30 (3.15-3.46) *** | 3.47 (3.20-3.75) ***                         | 3.20 (2.95-3.48) *** |
| Polypharmacy (≥10 medications) | 5.72 (5.36-6.10) ***                                | 4.42 (4.11-4.75) *** | 4.20 (3.72-4.73) ***                         | 3.56 (3.12-4.05) *** |

§ : p>0.05 \* : p<0.05, \*\* : p<0.01, \*\*\* : p<0.001  
 Model 1: Adjusted for age, sex and socioeconomic status  
 Model 2: Adjusted for age, sex, socioeconomic status, smoking, alcohol frequency, body mass index and physical activity

37  
38  
39  
40  
41  
42  
43  
44  
45  
46  
47  
48  
49  
50  
51  
52  
53  
54  
55  
56  
57  
58  
59  
60

| ADR               | Self-report COPD compared with no COPD<br>N=502,640 |                      | GOLD COPD compared with no COPD<br>N=496,943 |                      |
|-------------------|-----------------------------------------------------|----------------------|----------------------------------------------|----------------------|
|                   | Model 1<br>N=502,013                                | Model 2<br>N=487,718 | Model 1<br>N=496,943                         | Model 2<br>N=482,378 |
|                   | OR (95% CI)                                         | OR (95% CI)          | OR (95% CI)                                  | OR (95% CI)          |
| Falls             | 2.27 (2.13 – 2.42) ***                              | 1.83 (1.71-1.96) *** | 1.66 (1.47 – 1.87) ***                       | 1.49 (1.30-1.69) *** |
| Constipation      | 2.71 (2.54 – 2.89) ***                              | 2.66 (2.39-2.96) *** | 2.18 (1.77 – 2.64) ***                       | 1.82 (1.47-2.24) *** |
| Urinary retention | 3.38 (2.94 – 3.87) ***                              | 2.59 (2.22-3.0) ***  | 1.98 (1.44 – 2.64) ***                       | 1.64 (1.18-2.21) **  |
| CNS Depression    | 3.75 (3.31 – 4.25) ***                              | 2.81 (2.45-3.22) *** | 2.29 (1.73 – 2.95) ***                       | 1.87 (1.40-2.43) *** |
| Bleeding          | 4.60 (3.35 – 6.19) ***                              | 3.39 (2.40-4.66) *** | 2.63 (1.25 – 4.80) **                        | 1.76 (0.75-3.48) §   |
| Renal injury      | 2.22 (1.86 – 2.62) ***                              | 1.84 (1.53-2.19) *** | 1.94 (1.41 – 2.58) ***                       | 1.84 (1.33-2.49) *** |

§ : p>0.05 \* : p<0.05, \*\* : p<0.01, \*\*\* : p<0.001  
 Model 1: Adjusted for age, sex and socioeconomic status  
 Model 2: Adjusted for age, sex, socioeconomic status, smoking, alcohol frequency, body mass index and physical activity

Subgroup analyses – comparing COPD with no COPD among participants with specific categories of comorbidity

**Table S4. Odds ratios (with 95% CI) for taking 3 of more medications associated with similar ADRs in participants with cardiovascular disease (CVD)**

| ADR               | Self-report COPD plus CVD compared with CVD alone (no COPD)<br>N=156,848 | GOLD COPD plus CVD compared with CVD alone (no COPD)<br>N=154,047 |
|-------------------|--------------------------------------------------------------------------|-------------------------------------------------------------------|
|                   | Model 1<br>N=156,667                                                     | Model 1<br>N=153,852                                              |
|                   | OR (95% CI)                                                              | OR (95% CI)                                                       |
| Falls             | 1.92 (1.79-2.07) ***                                                     | 1.59 (1.39-1.82) ***                                              |
| Constipation      | 2.89 (2.58-3.23) ***                                                     | 2.06 (1.63-2.57) ***                                              |
| Urinary retention | 2.78 (2.33-3.28) ***                                                     | 1.92 (1.30-2.72) ***                                              |
| CNS Depression    | 3.17 (2.71-3.69) ***                                                     | 2.17 (1.54-2.97) ***                                              |
| Bleeding          | 4.00 (2.85-5.48) ***                                                     | 2.26 (0.96-4.44) *                                                |
| Renal injury      | 1.90 (1.59-2.25) ***                                                     | 1.82 (1.31-2.45) ***                                              |

§ : p>0.05 \* : p<0.05, \*\* : p<0.01, \*\*\* : p<0.001  
Model 1: Adjusted for age, sex and socioeconomic status

**Table S5. Odds ratios (with 95% CI) for taking 3 of more medications associated with similar ADRs in participants with cancer**

| ADR               | Self-report COPD plus cancer compared with cancer alone (no COPD)<br>N=38,623 | GOLD COPD plus cancer compared with cancer alone (no COPD)<br>N=37,958 |
|-------------------|-------------------------------------------------------------------------------|------------------------------------------------------------------------|
|                   | Model 1<br>N=38,575                                                           | Model 1<br>N= 37,912                                                   |
|                   | OR (95% CI)                                                                   | OR (95% CI)                                                            |
| Falls             | 2.35 (1.95-2.81) ***                                                          | 1.49 (1.00-2.13) *                                                     |
| Constipation      | 3.55 (2.73-4.56) ***                                                          | 2.21 (1.22-3.68) **                                                    |
| Urinary retention | 3.65 (2.52-5.13) ***                                                          | 1.99 (0.78-4.14) §                                                     |
| CNS Depression    | 3.74 (2.66-5.14) ***                                                          | 2.04 (0.86-4.04) §                                                     |
| Bleeding          | 4.69 (1.91-9.86) ***                                                          | 2.20 (0.12-10.23) §                                                    |
| Renal injury      | 2.0 (1.17-3.20) **                                                            | 2.26 (0.89-4.71) §                                                     |

§ : p>0.05 \* : p<0.05, \*\* : p<0.01, \*\*\* : p<0.001  
Model 1: Adjusted for age, sex and socioeconomic status

**Table S6. Odds ratios (with 95% CI) for taking 3 of more medications associated with similar ADRs in participants with gastrointestinal disease (GI)**

| ADR               | Self-report COPD plus GI compared with GI alone (no COPD)<br>N=58372 | GOLD COPD plus GI compared with GI alone (no COPD)<br>N=57103 |
|-------------------|----------------------------------------------------------------------|---------------------------------------------------------------|
|                   | Model 1<br>N=58,299                                                  | Model 1<br>N=57,031                                           |
|                   | OR (95% CI)                                                          | OR (95% CI)                                                   |
| Falls             | 2.18 (1.92-2.46) ***                                                 | 1.46 (1.13-1.87) **                                           |
| Constipation      | 2.70 (2.29-3.16) ***                                                 | 1.58 (1.08-2.24) *                                            |
| Urinary retention | 2.64 (2.12-3.26) ***                                                 | 1.46 (0.83-2.37) §                                            |
| CNS Depression    | 3.02 (2.47-3.66) ***                                                 | 1.50 (0.88-2.37) §                                            |
| Bleeding          | 3.88 (2.27-6.25) ***                                                 | 3.18 (0.97-7.63) §                                            |
| Renal injury      | 1.99 (1.37-2.80) ***                                                 | 1.22 (0.48-2.51) §                                            |

§ : p>0.05 \* : p<0.05, \*\* : p<0.01, \*\*\* : p<0.001  
Model 1: Adjusted for age, sex and socioeconomic status

1  
2  
3  
4  
5  
6  
7  
8  
9  
10  
11  
12  
13  
14  
15  
16  
17  
18  
19  
20  
21  
22  
23

| <b>Table S7. Odds ratios (with 95% CI) for taking 3 of more medications associated with similar ADRs in participants with mental health conditions (MH)</b> |                                                                       |                                                               |
|-------------------------------------------------------------------------------------------------------------------------------------------------------------|-----------------------------------------------------------------------|---------------------------------------------------------------|
| ADR                                                                                                                                                         | Self-report COPD plus MH compared with MH alone (no COPD)<br>N=36,949 | GOLD COPD plus MH compared with MH alone (no COPD)<br>N=36126 |
|                                                                                                                                                             | Model 1<br>N=36,885                                                   | Model 1<br>N=36,065                                           |
|                                                                                                                                                             | OR (95% CI)                                                           | OR (95% CI)                                                   |
| Falls                                                                                                                                                       | 2.21 (1.90-2.56) ***                                                  | 1.35 (0.99-1.82) §                                            |
| Constipation                                                                                                                                                | 2.33 (1.93-2.81) ***                                                  | 1.62 (1.08-2.34) *                                            |
| Urinary retention                                                                                                                                           | 2.17 (1.71-2.74) ***                                                  | 1.42 (0.82-2.29) §                                            |
| CNS Depression                                                                                                                                              | 2.53 (2.04-3.12) ***                                                  | 1.66 (1.03-2.54) *                                            |
| Bleeding                                                                                                                                                    | 2.86 (1.77-4.17) ***                                                  | 1.94 (0.76-4.05) §                                            |
| Renal injury                                                                                                                                                | 1.86 (1.19-2.79) **                                                   | 1.27 (0.45-2.80) §                                            |
| § : p>0.05 * : p<0.05, ** : p<0.01, *** : p<0.001<br>Model 1: Adjusted for age, sex and socioeconomic status                                                |                                                                       |                                                               |

24  
25  
26  
27  
28  
29  
30  
31  
32  
33  
34  
35  
36  
37  
38  
39  
40  
41  
42  
43  
44  
45  
46  
47  
48  
49  
50  
51  
52  
53  
54  
55  
56  
57  
58  
59  
60

| <b>Table S8. Odds ratios (with 95% CI) for taking 3 of more medications associated with similar ADRs in participants with painful conditions</b> |                                                                                                       |                                                                                                |
|--------------------------------------------------------------------------------------------------------------------------------------------------|-------------------------------------------------------------------------------------------------------|------------------------------------------------------------------------------------------------|
| ADR                                                                                                                                              | Self-report COPD plus painful conditions compared with painful conditions alone (no COPD)<br>N=83,992 | GOLD COPD plus painful conditions compared with painful conditions alone (no COPD)<br>N=82,388 |
|                                                                                                                                                  | Model 1<br>N=83,895                                                                                   | Model 1<br>N=82,294                                                                            |
|                                                                                                                                                  | OR (95% CI)                                                                                           | OR (95% CI)                                                                                    |
| Falls                                                                                                                                            | 1.99 (1.79-2.19) ***                                                                                  | 1.45 (1.19-1.75) ***                                                                           |
| Constipation                                                                                                                                     | 2.54 (2.21-2.91) ***                                                                                  | 1.50 (1.10-2.00) **                                                                            |
| Urinary retention                                                                                                                                | 2.46 (2.03-2.96) ***                                                                                  | 1.11 (0.64-1.75) §                                                                             |
| CNS Depression                                                                                                                                   | 2.71 (2.28-3.21) ***                                                                                  | 1.40 (0.90-2.06) §                                                                             |
| Bleeding                                                                                                                                         | 3.50 (2.37-5.01) ***                                                                                  | 2.20 (0.86-4.54) §                                                                             |
| Renal injury                                                                                                                                     | 1.66 (1.30-2.09) ***                                                                                  | 1.49 (0.93-2.25) §                                                                             |
| § : p>0.05 * : p<0.05, ** : p<0.01, *** : p<0.001<br>Model 1: Adjusted for age, sex and socioeconomic status                                     |                                                                                                       |                                                                                                |

| Appendix 4: Specific medications in UK Biobank participants with and without COPD |                                  |                                            |                            |                            |                                 |                               |
|-----------------------------------------------------------------------------------|----------------------------------|--------------------------------------------|----------------------------|----------------------------|---------------------------------|-------------------------------|
| Medications                                                                       | Control<br>n=494323<br>count (%) | Self-report<br>COPD<br>n=8317<br>count (%) | GOLD COPD                  |                            |                                 |                               |
|                                                                                   |                                  |                                            | All<br>n=2620<br>count (%) | Mild<br>n=399<br>count (%) | Moderate<br>n=1409<br>count (%) | Severe<br>n= 812<br>count (%) |
| <b>Total number of medications</b>                                                |                                  |                                            |                            |                            |                                 |                               |
| ≥1                                                                                | 356406 (72.1)                    | 7670 (92.2)                                | 2452 (93.6)                | 352 (88.2)                 | 1321 (93.8)                     | 779 (95.9)                    |
| ≥5                                                                                | 87286 (17.7)                     | 4312 (51.8)                                | 1349 (51.5)                | 171 (42.9)                 | 702 (49.8)                      | 476 (58.6)                    |
| ≥10                                                                               | 10678 (2.2)                      | 1269 (15.3)                                | 329 (12.6)                 | 31 (7.8)                   | 172 (12.2)                      | 126 (15.5)                    |
| <b>Respiratory</b>                                                                |                                  |                                            |                            |                            |                                 |                               |
| Short acting B <sub>2</sub> agon.                                                 | 22615 (4.6)                      | 3328 (40.0)                                | 1245 (47.5)                | 123 (30.8)                 | 614 (43.6)                      | 508 (62.6)                    |
| LABA                                                                              | 9819 (2.0)                       | 2357 (28.3)                                | 905 (34.5)                 | 93 (23.3)                  | 411 (29.2)                      | 401 (49.3)                    |
| LAMA                                                                              | 597 (0.1)                        | 1345 (16.2)                                | 581 (22.2)                 | 33 (8.3)                   | 265 (18.8)                      | 283 (34.9)                    |
| ICS                                                                               | 15309 (3.1)                      | 2638 (31.7)                                | 962 (36.7)                 | 98 (24.6)                  | 471 (33.4)                      | 393 (48.4)                    |
| LABA+ICS                                                                          | 7259 (1.5)                       | 1842 (22.1)                                | 699 (26.7)                 | 67 (16.8)                  | 313 (22.2)                      | 319 (39.3)                    |
| Prednisolone                                                                      | 3127 (0.6)                       | 280 (3.4)                                  | 82 (3.1)                   | 12 (3.0)                   | 27 (1.9)                        | 43 (5.3)                      |
| Mucolytic                                                                         | 174 (0.04)                       | 187 (2.2)                                  | 49 (1.9)                   | 1 (0.3)                    | 10 (0.7)                        | 38 (4.7)                      |
| <b>Cardiovascular</b>                                                             |                                  |                                            |                            |                            |                                 |                               |
| Antiplatelet                                                                      | 21817 (4.4)                      | 894 (10.7)                                 | 268 (10.2)                 | 31 (7.8)                   | 158 (11.2)                      | 79 (9.7)                      |
| ACE-inhibitor                                                                     | 44991 (9.1)                      | 1276 (15.3)                                | 367 (14.0)                 | 33 (8.3)                   | 198 (14.1)                      | 136 (16.7)                    |
| ARB                                                                               | 17911 (3.6)                      | 565 (6.8)                                  | 159 (6.1)                  | 17 (4.3)                   | 83 (5.9)                        | 59 (7.2)                      |
| Calcium CB                                                                        | 14317 (2.9)                      | 627 (7.5)                                  | 196 (7.5)                  | 23 (5.8)                   | 106 (7.5)                       | 67 (8.3)                      |
| Statin                                                                            | 73439 (14.9)                     | 2278 (27.4)                                | 707 (27.0)                 | 72 (18.0)                  | 395 (28.0)                      | 240 (29.6)                    |
| GTN                                                                               | 4425 (0.9)                       | 373 (4.5)                                  | 110 (4.2)                  | 8 (2.0)                    | 70 (5.0)                        | 32 (3.9)                      |
| ISMN                                                                              | 2814 (0.6)                       | 244 (2.9)                                  | 68 (2.6)                   | 5 (1.3)                    | 42 (3.0)                        | 21 (2.6)                      |
| Loop diuretic                                                                     | 4836 (1.0)                       | 415 (5.0)                                  | 107 (4.1)                  | 10 (2.5)                   | 51 (3.6)                        | 46 (5.7)                      |
| Thiazide                                                                          | 21961 (4.4)                      | 637 (7.7)                                  | 196 (7.5)                  | 22 (5.5)                   | 108 (7.7)                       | 66 (8.1)                      |
| Warfarin                                                                          | 4934 (1.0)                       | 238 (2.9)                                  | 67 (2.6)                   | 6 (1.5)                    | 33 (2.3)                        | 28 (3.4)                      |
| <b>Diabetes</b>                                                                   |                                  |                                            |                            |                            |                                 |                               |
| Insulin                                                                           | 4643 (0.9)                       | 161 (1.9)                                  | 35 (1.3)                   | 2 (0.5)                    | 23 (1.6)                        | 3 (0.4)                       |
| Metformin                                                                         | 13754 (2.8)                      | 448 (5.4)                                  | 102 (3.9)                  | 7 (1.8)                    | 57 (4.0)                        | 38 (4.7)                      |
| Sulphonylurea                                                                     | 4901 (1.0)                       | 158 (1.9)                                  | 35 (1.3)                   | 2 (0.5)                    | 17 (1.2)                        | 16 (2.0)                      |
| Thiazolidindione                                                                  | 2212 (0.4)                       | 60 (0.7)                                   | 17 (0.6)                   | 1 (0.3)                    | 10 (0.7)                        | 6 (0.7)                       |
| <b>Gastrointestinal</b>                                                           |                                  |                                            |                            |                            |                                 |                               |
| PPI                                                                               | 42012 (8.5)                      | 1989 (23.9)                                | 522 (19.9)                 | 79 (19.8)                  | 286 (20.3)                      | 157 (19.3)                    |
| Antacid                                                                           | 2435 (0.5)                       | 146 (1.8)                                  | 25 (1.0)                   | 7 (1.8)                    | 10 (0.7)                        | 8 (1.0)                       |
| H <sub>2</sub> RA.                                                                | 7772 (1.6)                       | 325 (3.9)                                  | 89 (3.4)                   | 15 (3.8)                   | 53 (3.8)                        | 21 (2.6)                      |
| Laxative                                                                          | 5787 (1.8)                       | 317 (3.8)                                  | 81 (3.1)                   | 11 (2.8)                   | 40 (2.8)                        | 30 (3.7)                      |
| <b>Pain</b>                                                                       |                                  |                                            |                            |                            |                                 |                               |
| Paracetamol                                                                       | 82376 (16.7)                     | 2752 (33.1)                                | 790 (30.2)                 | 111 (27.8)                 | 446 (31.6)                      | 233 (28.7)                    |
| NSAID                                                                             | 45909 (9.3)                      | 1149 (13.8)                                | 319 (12.2)                 | 50 (12.5)                  | 175 (12.4)                      | 94 (11.6)                     |
| Weak opiate                                                                       | 18736 (3.8)                      | 1209 (14.5)                                | 336 (12.8)                 | 48 (12.0)                  | 191 (13.6)                      | 97 (11.9)                     |
| Strong opiate                                                                     | 1071 (0.2)                       | 106 (1.8)                                  | 32 (1.2)                   | 5 (1.3)                    | 16 (1.1)                        | 11 (1.4)                      |
| <b>Mental health</b>                                                              |                                  |                                            |                            |                            |                                 |                               |
| SSRI+related                                                                      | 15394 (3.1)                      | 747 (9.0)                                  | 175 (6.7)                  | 31 (7.8)                   | 100 (7.1)                       | 44 (5.4)                      |
| Tricyclic                                                                         | 4229 (0.9)                       | 206 (2.5)                                  | 49 (1.9)                   | 11 (2.8)                   | 25 (1.8)                        | 13 (1.6)                      |
| Antipsychotic                                                                     | 2237 (0.5)                       | 107 (1.3)                                  | 30 (1.1)                   | 5 (1.3)                    | 16 (1.1)                        | 9 (1.1)                       |
| Benzodiazepine                                                                    | 2316 (0.5)                       | 182 (2.2)                                  | 47 (1.8)                   | 6 (1.5)                    | 28 (2.0)                        | 13 (1.6)                      |
| <b>Metabolic</b>                                                                  |                                  |                                            |                            |                            |                                 |                               |
| Thyroxine                                                                         | 20980 (4.2)                      | 560 (6.7)                                  | 150 (5.7)                  | 27 (6.8)                   | 92 (6.5)                        | 31 (3.8)                      |
| Bisphosphonate                                                                    | 3655 (0.7)                       | 189 (2.3)                                  | 66 (2.5)                   | 15 (3.8)                   | 32 (2.3)                        | 19 (2.3)                      |

**STROBE 2007 (v4) Statement—Checklist of items that should be included in reports of *cross-sectional studies***

| Section/Topic                | Item # | Recommendation                                                                                                                                                                       | Reported on page # |
|------------------------------|--------|--------------------------------------------------------------------------------------------------------------------------------------------------------------------------------------|--------------------|
| <b>Title and abstract</b>    | 1      | (a) Indicate the study's design with a commonly used term in the title or the abstract                                                                                               | 2                  |
|                              |        | (b) Provide in the abstract an informative and balanced summary of what was done and what was found                                                                                  | 2,3                |
| <b>Introduction</b>          |        |                                                                                                                                                                                      |                    |
| Background/rationale         | 2      | Explain the scientific background and rationale for the investigation being reported                                                                                                 | 4                  |
| Objectives                   | 3      | State specific objectives, including any prespecified hypotheses                                                                                                                     | 5                  |
| <b>Methods</b>               |        |                                                                                                                                                                                      |                    |
| Study design                 | 4      | Present key elements of study design early in the paper                                                                                                                              | 5,6,9              |
| Setting                      | 5      | Describe the setting, locations, and relevant dates, including periods of recruitment, exposure, follow-up, and data collection                                                      | 6,7                |
| Participants                 | 6      | (a) Give the eligibility criteria, and the sources and methods of selection of participants                                                                                          | 7                  |
| Variables                    | 7      | Clearly define all outcomes, exposures, predictors, potential confounders, and effect modifiers. Give diagnostic criteria, if applicable                                             | 6-8                |
| Data sources/<br>measurement | 8*     | For each variable of interest, give sources of data and details of methods of assessment (measurement). Describe comparability of assessment methods if there is more than one group | 6-8                |
| Bias                         | 9      | Describe any efforts to address potential sources of bias                                                                                                                            | 14,15              |
| Study size                   | 10     | Explain how the study size was arrived at                                                                                                                                            | 7                  |
| Quantitative variables       | 11     | Explain how quantitative variables were handled in the analyses. If applicable, describe which groupings were chosen and why                                                         | 6,7,8,9            |
| Statistical methods          | 12     | (a) Describe all statistical methods, including those used to control for confounding                                                                                                | 8-10               |
|                              |        | (b) Describe any methods used to examine subgroups and interactions                                                                                                                  | 9,10               |
|                              |        | (c) Explain how missing data were addressed                                                                                                                                          | 10                 |
|                              |        | (d) If applicable, describe analytical methods taking account of sampling strategy                                                                                                   | n/a                |
|                              |        | (e) Describe any sensitivity analyses                                                                                                                                                | 9,10               |
| <b>Results</b>               |        |                                                                                                                                                                                      |                    |

|                          |     |                                                                                                                                                                                                              |                             |
|--------------------------|-----|--------------------------------------------------------------------------------------------------------------------------------------------------------------------------------------------------------------|-----------------------------|
| Participants             | 13* | (a) Report numbers of individuals at each stage of study—eg numbers potentially eligible, examined for eligibility, confirmed eligible, included in the study, completing follow-up, and analysed            | 11, figure 1                |
|                          |     | (b) Give reasons for non-participation at each stage                                                                                                                                                         | 11, Figure 1                |
|                          |     | (c) Consider use of a flow diagram                                                                                                                                                                           | Figure 1                    |
| Descriptive data         | 14* | (a) Give characteristics of study participants (eg demographic, clinical, social) and information on exposures and potential confounders                                                                     | Table 1                     |
|                          |     | (b) Indicate number of participants with missing data for each variable of interest                                                                                                                          | Table 1                     |
| Outcome data             | 15* | Report numbers of outcome events or summary measures                                                                                                                                                         | 11-13, figure 2, appendix 3 |
| Main results             | 16  | (a) Give unadjusted estimates and, if applicable, confounder-adjusted estimates and their precision (eg, 95% confidence interval). Make clear which confounders were adjusted for and why they were included | 11-13, figure 2, appendix 3 |
|                          |     | (b) Report category boundaries when continuous variables were categorized                                                                                                                                    | 12,13                       |
|                          |     | (c) If relevant, consider translating estimates of relative risk into absolute risk for a meaningful time period                                                                                             | n/a                         |
| Other analyses           | 17  | Report other analyses done—eg analyses of subgroups and interactions, and sensitivity analyses                                                                                                               | 12,13, Appendix 3,          |
| <b>Discussion</b>        |     |                                                                                                                                                                                                              |                             |
| Key results              | 18  | Summarise key results with reference to study objectives                                                                                                                                                     | 14                          |
| Limitations              | 19  | Discuss limitations of the study, taking into account sources of potential bias or imprecision. Discuss both direction and magnitude of any potential bias                                                   | 14,15                       |
| Interpretation           | 20  | Give a cautious overall interpretation of results considering objectives, limitations, multiplicity of analyses, results from similar studies, and other relevant evidence                                   | 15,16                       |
| Generalisability         | 21  | Discuss the generalisability (external validity) of the study results                                                                                                                                        | 15,16,17                    |
| <b>Other information</b> |     |                                                                                                                                                                                                              |                             |
| Funding                  | 22  | Give the source of funding and the role of the funders for the present study and, if applicable, for the original study on which the present article is based                                                | 17,18                       |

\*Give information separately for cases and controls in case-control studies and, if applicable, for exposed and unexposed groups in cohort and cross-sectional studies.

**Note:** An Explanation and Elaboration article discusses each checklist item and gives methodological background and published examples of transparent reporting. The STROBE checklist is best used in conjunction with this article (freely available on the Web sites of PLoS Medicine at <http://www.plosmedicine.org/>, Annals of Internal Medicine at <http://www.annals.org/>, and Epidemiology at <http://www.epidem.com/>). Information on the STROBE Initiative is available at [www.strobe-statement.org](http://www.strobe-statement.org).

# BMJ Open

## Examining Patterns of Multimorbidity, Polypharmacy and Risk of Adverse Drug Reactions in Chronic Obstructive Pulmonary Disease: A Cross-Sectional UK Biobank Study

|                                 |                                                                                                                                                                                                                                                                                                                                                                                                                                                                  |
|---------------------------------|------------------------------------------------------------------------------------------------------------------------------------------------------------------------------------------------------------------------------------------------------------------------------------------------------------------------------------------------------------------------------------------------------------------------------------------------------------------|
| Journal:                        | <i>BMJ Open</i>                                                                                                                                                                                                                                                                                                                                                                                                                                                  |
| Manuscript ID                   | bmjopen-2017-018404.R2                                                                                                                                                                                                                                                                                                                                                                                                                                           |
| Article Type:                   | Research                                                                                                                                                                                                                                                                                                                                                                                                                                                         |
| Date Submitted by the Author:   | 23-Nov-2017                                                                                                                                                                                                                                                                                                                                                                                                                                                      |
| Complete List of Authors:       | Hanlon, Peter; University of Glasgow Institute of Health and Wellbeing<br>Nicholl, Barbara; University of Glasgow, General Practice and Primary Care<br>Jani, Bhautesh; University of Glasgow<br>McQueenie, Ross; University of Glasgow, GPPC, School of Medicine,<br>Dentistry and Nursing, MVLS<br>Lee, Duncan; University of Glasgow<br>Gallacher, Katie I; University of Glasgow,<br>Mair, Frances; University of Glasgow, General Practice and Primary Care |
| <b>Primary Subject Heading</b>: | Respiratory medicine                                                                                                                                                                                                                                                                                                                                                                                                                                             |
| Secondary Subject Heading:      | General practice / Family practice                                                                                                                                                                                                                                                                                                                                                                                                                               |
| Keywords:                       | Multimorbidity, Polypharmacy, Chronic airways disease < THORACIC MEDICINE, Adverse events < THERAPEUTICS                                                                                                                                                                                                                                                                                                                                                         |
|                                 |                                                                                                                                                                                                                                                                                                                                                                                                                                                                  |

SCHOLARONE™  
Manuscripts

only

1  
2  
3 **Examining Patterns of Multimorbidity, Polypharmacy and Risk of Adverse Drug Reactions in**  
4  
5 **Chronic Obstructive Pulmonary Disease: A Cross-Sectional UK Biobank Study**  
6  
7  
8  
9

10 **Corresponding author**  
11

12  
13 Professor Frances S Mair  
14

15  
16 General Practice and Primary Care, Institute of Health and Wellbeing, University of Glasgow, 1  
17 Horelethill Road, Glasgow, G12 9LX, Scotland, United Kingdom  
18

19 Tel: +44 141 330 8317  
20

21 E-mail: frances.mair@glasgow.ac.uk  
22  
23  
24  
25  
26  
27

28 **Authors:**  
29

30 Peter Hanlon<sup>1</sup>, Barbara I. Nicholl<sup>1</sup>, Bhautesh Dinesh Jani<sup>1</sup>, Ross McQueenie<sup>1</sup>, Duncan Lee<sup>2</sup>, Katie I.  
31

32 Gallacher<sup>1</sup>, Frances S Mair<sup>1</sup>  
33  
34

- 35 1. General Practice and Primary Care, Institute of Health and Wellbeing, University of Glasgow,  
36 1 Horselethill Road, Glasgow, G12 9LX, Scotland, United Kingdom
- 37 2. School of Mathematics and Statistics, The mathematics and Statistics Building, University of  
38 Glasgow, University Place, Glasgow, G12 8SQ  
39  
40  
41  
42  
43

44 **Word count: 3446**  
45  
46  
47  
48  
49  
50  
51  
52  
53  
54  
55  
56  
57  
58  
59  
60



## Abstract

**Objective:** This study aims: (1) to describe the pattern and extent of multimorbidity and polypharmacy in UK Biobank participants with chronic obstructive pulmonary disease (COPD); and (2) to identify which comorbidities are associated with increased risk of adverse drug reactions (ADRs) resulting from polypharmacy.

**Design:** Cross-sectional.

**Setting:** Community cohort.

**Participants:** UK Biobank participants comparing self-reported COPD (n=8317) with no COPD (n=494,323).

**Outcomes:** Multimorbidity ( $\geq$  four conditions) and polypharmacy ( $\geq$  five medications) in participants with COPD versus those without. Risk of ADRs (taking  $\geq$  three medications associated with falls, constipation, urinary retention, central nervous system (CNS) depression, bleeding or renal injury) in relation to the presence of COPD and individual comorbidities.

**Results:** Multimorbidity was more common in participants with COPD than those without (17% vs. 4%). Polypharmacy was highly prevalent (52% with COPD taking  $\geq$  five medications vs 18% in those without COPD). Adjusting for age, sex and socioeconomic status, those with COPD were significantly more likely than those without to be prescribed  $\geq$ 3 medications contributing to falls (Odds ratio (OR) 2.27, 95% confidence interval (CI) 2.13 to 2.42), constipation (OR 3.42, 95% CI 3.10 to 3.77), urinary retention (OR 3.38, 95% CI 2.94 to 3.87), CNS depression (OR: 3.75, 95% CI 3.31 to 4.25), bleeding (OR 4.61, 95% CI 3.35 to 6.19) and renal injury (OR 2.22, 95% CI 1.86 to 2.62). Concomitant cardiovascular disease was associated with the greatest risk of taking  $\geq$ 3 medications associated with falls/renal injury. Concomitant mental health conditions were most strongly associated with medications linked with CNS depression/urinary retention/bleeding.

**Conclusions:** Multimorbidity is common in COPD and associated with high levels of polypharmacy. Co-prescription of drugs with various ADRs is common. Future research should examine the effects

1  
2  
3 on healthcare outcomes of co-prescribing multiple drugs with similar potential ADRs. Clinical  
4  
5 guidelines should emphasise assessment of multimorbidity and ADR risk.  
6  
7  
8  
9  
10  
11  
12

13 **Abstract word count: 300**  
14  
15  
16  
17  
18  
19  
20  
21

### 22 **Strengths and Limitations**

23  
24

- 25 • This paper assesses multimorbidity, polypharmacy and risk of adverse drug reactions in UK  
26 Biobank participants with self-reported COPD compared with those without COPD.
- 27 • Baseline variables from the UK Biobank assessment centre were used to adjust for potential  
28 confounders.
- 29 • Cumulative risk of common adverse drug reactions was quantified by identifying UK Biobank  
30 participants taking three or more medications associated with similar adverse drug  
31 reactions.  
32
- 33 • Analyses were repeated using a subgroup of participants with spirometry data confirming  
34 airflow obstruction.  
35
- 36 • Medication and comorbidity data rely on participant self-report, and may thus be  
37 susceptible to bias or inaccuracy.  
38  
39  
40  
41  
42  
43  
44  
45  
46  
47  
48  
49  
50  
51  
52  
53  
54  
55  
56  
57  
58  
59  
60

## BACKGROUND

In people with Chronic Obstructive Pulmonary Disease (COPD), multimorbidity (the presence of two or more long-term conditions (LTCs)) is highly prevalent.(1-4) A recent meta-analysis of 29 datasets demonstrated that those with COPD are significantly more likely to be diagnosed with a range of cardiovascular comorbidities than those without COPD (we will use the term comorbidity when referring to specific conditions in addition to COPD, and multimorbidity to refer to the presence of two or more LTCs).(5) Other LTCs with known increased prevalence in COPD include obesity,(6) depression,(7-10) gastro-oesophageal reflux disease,(11-13) osteoporosis,(14-16) and lung cancer.(17, 18) Each of these conditions has been associated with poorer health related outcomes in COPD when compared to those with no comorbidity.(19-30) The overall burden of multimorbidity also impacts prognosis in COPD, for example higher number of comorbidities is associated with higher risk of mortality,(31) and higher burden of morbidity assessed using the Charlson index and the COPD-specific comorbidity test (COTE) is associated with higher risk of all-cause and respiratory specific mortality.(32, 33) The importance of considering the impact of multimorbidity in the management of long-term conditions is increasingly recognised, particularly in the context of an ageing society in which the prevalence of multimorbidity is growing.(34) However, an immature evidence base means that disease specific guidelines often lack specific recommendations with respect to multimorbidity.(35) The prevalence and prognostic significance of multimorbidity in COPD make it a potentially useful exemplar condition in which to consider the specific implications of different patterns of multimorbidity. Polypharmacy is one such implication.

Multimorbidity in the general population is associated with polypharmacy (often defined as concomitant use of  $\geq 5$  or  $\geq 10$  pharmacological agents).(36) Polypharmacy has been associated with increased risk of adverse drug reactions (ADRs)(37-39) and potentially preventable hospital admissions, particularly in the elderly.(40, 41) This is particularly pertinent in an ageing society, in

1  
2  
3 which the a rising prevalence of polypharmacy has been observed.(34, 37) It has been demonstrated  
4  
5 that diagnosis of COPD is associated with increased risk of polypharmacy.(42, 43) This is, in large  
6  
7 measure, due to the high burden of extra-pulmonary comorbidities.(44) However, little is known  
8  
9 about the risk of ADRs in the context of multimorbidity in COPD.  
10

11  
12  
13  
14  
15 Given the well-established burden of multimorbidity and polypharmacy in COPD, it is likely that  
16  
17 those with COPD are at increased risk of ADRs resulting from polypharmacy. Previous analyses have  
18  
19 not focused on the risk of specific ADRs, or assessed which LTCs increase this risk, instead reporting  
20  
21 overall counts of prescribed medication. Data collected for the UK Biobank cohort offers an  
22  
23 opportunity to assess how multimorbidity in COPD relates to polypharmacy and to assess the  
24  
25 prevalence of co-prescription of medications with similar ADRs.  
26  
27  
28  
29  
30

31 This paper aims:

- 32  
33  
34 • To describe the pattern and extent of multimorbidity and polypharmacy in UK Biobank  
35  
36 participants with COPD.
- 37  
38 • To identify which LTCs in people with COPD are associated with increased risk of ADRs  
39  
40 resulting from polypharmacy.  
41  
42  
43  
44  
45  
46  
47  
48  
49  
50  
51  
52  
53  
54  
55  
56  
57  
58  
59  
60

## METHODS

### Data collection

The UK Biobank is a large, population cohort that recruited voluntary participants from throughout the United Kingdom. Between 2006 and 2010, UK Biobank recruited 502,640 participants aged 37 to 73. Participants underwent baseline assessments at one of 22 assessment centres throughout England, Scotland and Wales. Sociodemographic and lifestyle details were recorded using touchscreen questionnaires. Townsend scores were derived from participant postcodes to provide an area-based measure of socioeconomic deprivation. Self-reported LTCs, prescribed and over-the-counter medications, smoking status (current, previous or never) and frequency of alcohol intake (never / special occasions only, one-three times a month, at least once a week) were recorded from a touchscreen questionnaire and subsequent verbal interview with a study nurse. Physical activity was self-reported based on a questionnaire administered in the UK Biobank assessment centre.<sup>(45)</sup> We classified the responses into: none (no physical activity in the last four weeks), low (light 'DIY' activity only in the last four weeks), medium (heavy DIY and/or walking for pleasure and/or other exercises in the last four weeks), and high (strenuous sports in the last four weeks).

Study centre staff also collected physical measures including height and weight (to calculate body mass index (BMI)) and spirometry. Spirometry was performed using a Vitalograph Pneumotrac 6800. Individual reasons for contraindications to attempting spirometry were not recorded but, according to protocol, these included chest infection in the last month, history of collapsed lung, and heart attack or surgery in the past three months. Full details of the Biobank spirometry protocol are available at <https://biobank.ctsu.ox.ac.uk/crystal/docs/Spirometry.pdf>. In brief, participants were allowed up to three attempts to provide two reproducible spirometry measurements. Where the reproducibility of the first two was deemed acceptable (<5% variation in both FEV1 and FVC) a third measurement was not performed. All values were recorded along with any error messages generated. As per the American Thoracic Society/European Respiratory Society (ATS/ERS) end-of-

1  
2  
3 test criteria, we interpreted as valid any measurement with no error message or if 'user accepted'  
4 was specified.(46) No post-bronchodilator measurements were recorded, which deviates from the  
5  
6  
7  
8  
9  
10  
11  
12  
13  
14  
15  
16  
17  
18  
19  
20  
21  
22  
23  
24  
25  
26  
27  
28  
29  
30  
31  
32  
33  
34  
35  
36  
37  
38  
39  
40  
41  
42  
43  
44  
45  
46  
47  
48  
49  
50  
51  
52  
53  
54  
55  
56  
57  
58  
59  
60

test criteria, we interpreted as valid any measurement with no error message or if 'user accepted' was specified.(46) No post-bronchodilator measurements were recorded, which deviates from the ATS/ERS guidelines and the Global Initiative for Chronic Obstructive Lung Disease (GOLD) guidelines for COPD.(47, 48)

Participants provided full informed consent to participate in UK Biobank and this study had full ethical approval from the NHS National Research Ethics Service for UK Biobank studies (Ref 16/NW/0274); this study is part of UK Biobank approved project number 14151.

### Defining COPD

Participants reporting to have been diagnosed with chronic obstructive pulmonary disease, chronic bronchitis, or emphysema at the nurse-led interview were coded as having 'self-reported COPD'.

Due to the potential inaccuracies of using self-reported diagnoses, we identified a subset of those with self-reported COPD who met an adaptation of the Global Initiative for Obstructive Lung Disease (GOLD) spirometry criteria for COPD.(48) This subset, referred to as 'GOLD COPD', was used as a sensitivity analysis for self-reported COPD, and to stratify findings by severity of airflow obstruction. For participants with self-report COPD and valid spirometry measurements, we calculated the ratio of forced expiratory volume in 1 second (FEV1) to forced vital capacity (FVC) using the highest measurement for each participant meeting the American Thoracic Society/European Respiratory Society end-of-test criteria.(46) Those with a FEV1/FVC ratio  $<0.7$  were classed as having an obstructive deficit and thus meeting the GOLD diagnostic criteria for COPD. We used the Hankinson equation,(49) based on recorded age, sex and height, to calculate predicted FEV1 values for each participant. Those with GOLD COPD were classified on the basis of their best available FEV1 measurement as having mild ( $>80\%$  predicted FEV1), moderate (50-80% predicted FEV1), or severe ( $<50\%$  predicted FEV1) airflow obstruction in line with the GOLD COPD guidelines.(48)

## Defining long term conditions and medications

All LTCs were defined by self-report. The list of included LTCs was taken from a list of 42 morbidities originally established for a large multimorbidity epidemiological study in Scotland, through systematic review, the Quality and Outcomes Framework, NHS Scotland and an expert panel (34), and subsequently amended for UK Biobank (50). The inclusion of 'other painful conditions' comprised LTCs in which pain is a predominant feature (particularly as this is likely to influence medication use). It should be noted that such a list is not exhaustive, but intended to cover common conditions frequently requiring prescription of analgesics (e.g. osteoarthritis, back pain, headaches etc.). Morbidities were categorised for the purposes of this analysis into cardiovascular disease, gastrointestinal disease, mental health conditions, cancer, and painful conditions/inflammatory arthropathies (comprising the list of 'other painful conditions' mentioned above, plus connective tissue diseases). Full details of conditions comprising each category can be found in appendix 1.

Medication data were collected by self-report. Medications were coded by mechanism of action according to the British National Formulary (BNF) (e.g. Angiotensin-converting enzyme inhibitors, beta-blockers, calcium channel blockers, etc.).(51) For some situations where more than one medication with a similar mechanism of action may be commonly co-prescribed (e.g. aspirin and clopidogrel, both antiplatelets) these were coded separately. A complete list of the medications coded within each class can be found in appendix 2.

We defined those at risk of specific ADRs as anyone on 3 or more medications with similar potential ADRs, based on information provided in the *Scottish Government Model of Care Polypharmacy Working Group: Polypharmacy Guidance*.(52) This guideline cross-tabulates commonly prescribed medications with common ADRs to help identify those at cumulative risk of ADRs. This document groups common medications by similar potential ADRs. While this list is not all-inclusive, and the cut-

1  
2  
3 off value of three or more medications is arbitrary, this does allow an estimation of the cumulative  
4 risk of specific ADRs. We identified six potential ADRs (falls/fractures, constipation, urinary  
5 retention, CNS depression, bleeding and renal injury) for which the proportion of participants taking  
6 three or more associated medications could be assessed. It should be noted that several of these  
7 event (e.g. falls/fractures, CNS depression) are often multifactorial, and medication may be a  
8 contributing factor rather than a definitive cause. As the guideline acknowledges, however, these  
9 are clinical events of which the risk is increased by taking multiple associated medications.  
10  
11  
12  
13  
14  
15  
16  
17  
18  
19  
20

### 21 **Statistical analysis**

22 All analyses were planned prior to inspection of the data.  
23  
24  
25

#### 26 **Baseline variables**

27 Comparisons were made between participants with self-reported COPD and the rest of the cohort  
28 (who did not report COPD). Age, sex, smoking status, deprivation (Townsend score), BMI, physical  
29 activity and frequency of alcohol intake were compared using  $\chi^2$  test for categorical variables,  $\chi^2$  test  
30 for trend for ordinal variables, and Mann-Whitney-U test for continuous variables. Total number of  
31 morbidities, prevalence of specific morbidities, number of self-reported prescribed medications, and  
32 proportion of participants taking each class of medication (Appendix 2), were also compared  
33 between those with self-reported COPD and the rest of the cohort. All comparisons were repeated  
34 comparing participants with GOLD COPD only with those without COPD, stratifying by severity of  
35 airflow obstruction.  
36  
37  
38  
39  
40  
41  
42  
43  
44  
45  
46  
47  
48

#### 49 **Multimorbidity and polypharmacy**

50 Logistic regression analyses were used to compare participants with self-reported COPD and those  
51 without COPD. Odds ratios (OR) and 95% confidence intervals (95% CI) were calculated for:  
52  
53  
54  
55  
56  
57  
58  
59  
60



- the presence of cardiovascular disease, cancer, gastrointestinal disease, mental health conditions and painful conditions/inflammatory arthropathies
- the presence of four or more morbidities (excluding COPD)
- the use of five or more, and 10 or more, medications (two separate models)

Models were initially adjusted for age, sex and socioeconomic deprivation (model 1), then adjusted for the addition of smoking status, alcohol frequency, BMI and physical activity (model 2). These analyses were repeated comparing those with GOLD COPD only to those without COPD.

### **Risk of ADRs**

For each potential ADR (falls/fractures, constipation, urinary retention, CNS depression, bleeding and renal injury) participants taking three or more medications associated with that ADR were identified. The following comparisons were then made:

- Unadjusted percentages at risk of each ADR were calculated for participants without COPD, with self-reported COPD, and with self-reported COPD plus each category of LTC (cardiovascular disease, cancer, gastrointestinal disease, mental health conditions and painful conditions/inflammatory arthropathies) to give an impression of the ADR risk in COPD, and identify LTCs in those with COPD that may increase this risk.
- ORs of being at risk of each ADR were calculated comparing those with self-reported COPD to those without COPD adjusting for age, sex and socioeconomic deprivation (model 1) and for age, sex, socioeconomic deprivation, smoking status, alcohol frequency, BMI and physical activity (model 2).
- ORs of being at risk of each ADR were calculated comparing those with and without self-reported COPD in each LTC category to (i.e. participants with cardiovascular disease alone compared to participants with cardiovascular disease plus COPD, etc.). This was intended to identify whether specific patterns of multimorbidity in COPD are associated with increased

1  
2  
3 ADR risk. Adjustment for a wide range of potential confounders was not appropriate in  
4  
5 these models due to the smaller number of participants in each model.  
6

7  
8 Each analysis was repeated comparing GOLD COPD only to those without COPD. Less than 3% of  
9  
10 participants (with or without COPD) had missing data for potential confounding variables (table 1).  
11  
12 Those with missing data were excluded from adjusted analyses. Spirometry data were missing for  
13  
14 3591 participants with self-report COPD (43%), hence the use of the GOLD COPD subset as a  
15  
16 sensitivity analysis.  
17

18  
19 All analyses were performed using R statistical software (version 3.3.1).  
20  
21  
22  
23  
24  
25  
26  
27  
28  
29  
30  
31  
32  
33  
34  
35  
36  
37  
38  
39  
40  
41  
42  
43  
44  
45  
46  
47  
48  
49  
50  
51  
52  
53  
54  
55  
56  
57  
58  
59  
60

## RESULTS

At the time of recruitment, 8317 out of 502,619 participants reported having COPD (1.7%) and are referred to here as the self-report COPD group. Of those who self-reported COPD, 4726 (57%) had valid spirometry measurements. Spirometry was contraindicated or not available in 2507 of those with self-reported COPD. Spirometry measurements did not meet the ATS/ESR end-of-test criteria in 1084 participants.<sup>(46)</sup> Of those with valid spirometry, 2620 (55%) met the GOLD criteria for airflow obstruction (399 (15%) mild, 1409 (54%) moderate, 812 (31%) severe, see Figure 1) and are referred to here as GOLD COPD.

### Baseline variables

Table 1 describes and compares the characteristics of those with and without COPD in UK Biobank. Participants with COPD (both self-report and GOLD) were significantly older, more socioeconomically deprived, and less physically active. A higher proportion of those with COPD were male, obese and had a history of smoking.

| Table 1. Baseline variables               |                          |      |                              |      |         |                             |      |         |
|-------------------------------------------|--------------------------|------|------------------------------|------|---------|-----------------------------|------|---------|
| Characteristic                            | No COPD<br>n=494323      |      | COPD (self-report)<br>n=8317 |      |         | GOLD GOPD<br>n=2620         |      |         |
|                                           | Count                    | %    | Count                        | %    | p-value | Count                       | %    | p-value |
| <b>Sex</b>                                |                          |      |                              |      |         |                             |      |         |
| Male                                      | 224906                   | 45.5 | 4268                         | 51.3 |         | 1426                        | 54.4 |         |
| Female                                    | 269417                   | 54.5 | 4049                         | 48.7 | <0.001  | 1194                        | 45.6 | <0.001  |
| <b>Age</b>                                | Median: 58<br>IQR: 50-63 |      | Median: 62<br>IQR: 57-66     |      | <0.001  | Median:<br>63<br>IQR: 59-66 |      | <0.001  |
| <b>Ethnicity</b>                          |                          |      |                              |      |         |                             |      |         |
| White                                     | 464770                   | 94.5 | 8052                         | 97.3 |         | 2620                        | 100  |         |
| Other                                     | 26821                    | 5.4  | 219                          | 2.6  | <0.001  | 0                           | 0    | <0.001  |
| Missing                                   | 2732                     |      | 46                           |      |         | 0                           | 0    |         |
| <b>Socioeconomic deprivation quintile</b> |                          |      |                              |      |         |                             |      |         |
| 1 (least deprived)                        | 99672                    | 20.2 | 1015                         | 12.2 |         | 309                         | 11.8 |         |
| 2                                         | 98977                    | 20.0 | 1142                         | 13.7 |         | 362                         | 13.8 |         |
| 3                                         | 99013                    | 20.1 | 1399                         | 16.8 |         | 440                         | 16.8 |         |
| 4                                         | 98660                    | 20.0 | 1735                         | 20.9 |         | 580                         | 22.2 |         |
| 5 (most deprived)                         | 98385                    | 19.7 | 3015                         | 36.3 | <0.001  | 926                         | 35.4 | <0.001  |
| Missing                                   | 616                      |      | 11                           |      |         | 3                           |      |         |
| <b>Smoking status</b>                     |                          |      |                              |      |         |                             |      |         |
| Current                                   | 50817                    | 10.3 | 2172                         | 26.3 |         | 833                         | 32.2 |         |
| Previous                                  | 169015                   | 34.4 | 4083                         | 49.5 |         | 1398                        | 54.0 |         |
| Never                                     | 271602                   | 55.3 | 1999                         | 24.2 | <0.001  | 360                         | 13.9 | <0.001  |
| Missing                                   | 2889                     |      | 63                           |      |         | 29                          |      |         |
| <b>Alcohol frequency</b>                  |                          |      |                              |      |         |                             |      |         |
| Daily                                     | 100070                   | 20.3 | 1720                         | 20.7 |         | 618                         | 23.6 |         |
| 3-4 times/week                            | 114058                   | 23.1 | 1404                         | 16.9 |         | 475                         | 18.2 |         |
| 1-2 times/week                            | 127459                   | 25.9 | 1863                         | 22.5 |         | 561                         | 21.5 |         |
| 1-3 times/month                           | 54979                    | 11.2 | 894                          | 10.8 |         | 289                         | 11.1 |         |
| Occasional                                | 56707                    | 11.5 | 1322                         | 15.9 |         | 387                         | 14.8 | <0.001  |
| Never                                     | 39569                    | 8.0  | 1092                         | 13.2 | <0.001  | 284                         | 10.9 |         |
| Missing                                   | 1481                     |      | 22                           |      |         | 6                           |      |         |
| <b>BMI</b>                                |                          |      |                              |      |         |                             |      |         |
| <18.5                                     | 2478                     | 0.5  | 148                          | 1.8  |         | 56                          | 2.2  |         |
| 18.5-24.9                                 | 155282                   | 31.8 | 2185                         | 26.8 |         | 829                         | 31.9 |         |
| 25.0-29.9                                 | 211102                   | 43.2 | 3165                         | 38.9 |         | 1049                        | 40.4 |         |
| >30                                       | 119813                   | 24.5 | 2647                         | 32.5 | <0.001  | 665                         | 25.6 | <0.001  |
| Missing                                   | 5648                     |      | 172                          |      |         | 21                          |      |         |
| <b>Physical activity</b>                  |                          |      |                              |      |         |                             |      |         |
| High                                      | 49827                    | 10.6 | 250                          | 3.1  |         | 70                          | 2.7  |         |
| Medium                                    | 387766                   | 79.6 | 5838                         | 72.0 |         | 1902                        | 73.3 |         |
| Low                                       | 18354                    | 3.8  | 589                          | 7.3  |         | 203                         | 7.8  |         |
| None                                      | 31425                    | 6.4  | 1433                         | 17.7 | <0.001  | 421                         | 16.2 | <0.001  |
| Missing                                   | 6951                     |      | 207                          |      |         | 24                          |      |         |
| <b>FEV1 (% predicted)</b>                 |                          |      |                              |      |         |                             |      |         |
| >80                                       | 272109                   | 78.0 | 1853                         | 39.2 |         | 399                         | 15.2 |         |
| 50-79                                     | 71727                    | 20.6 | 2022                         | 42.8 |         | 1409                        | 53.8 |         |
| <50                                       | 4841                     | 1.4  | 851                          | 18.0 | <0.001  | 812                         | 31.0 | <0.001  |
| Missing                                   | 145646                   |      | 3591                         |      |         | 1061                        |      |         |

### Multimorbidity and polypharmacy

Prevalence of each category of comorbidity was higher in those with COPD than without (table 2).

After controlling for age, sex and socioeconomic status, those with self-reported COPD were significantly more likely than those without to have each category of LTC examined: cardiovascular disease (OR 1.45; 95% confidence interval (CI) 1.39 to 1.52) , cancer (1.29; 1.2 to 1.39), gastrointestinal disease (1.76; 1.67 to 1.86) , mental health conditions (2.02; 1.89 to 2.15) , and painful conditions (1.54; 1.46 to 1.62). Results for GOLD COPD also suggested higher likelihood of each LTC compared to those without COPD, although the ORs were lower and results for cancer not statistically significant (appendix 3). Results were similar after adjusting for additional confounders (smoking status, alcohol frequency, BMI and physical activity) with the exception of cardiovascular disease in GOLD COPD, which was no longer significantly associated (1.08; 0.99 to 1.18) (appendix 3).

| Table 2: Long Term Conditions in those with and without COPD |                                  |                                            |                            |                            |                                 |                               |
|--------------------------------------------------------------|----------------------------------|--------------------------------------------|----------------------------|----------------------------|---------------------------------|-------------------------------|
|                                                              | Control<br>n=494323<br>count (%) | Self-report<br>COPD<br>n=8317<br>count (%) | GOLD COPD                  |                            |                                 |                               |
|                                                              |                                  |                                            | All<br>n=2620<br>count (%) | Mild<br>n=399<br>count (%) | Moderate<br>n=1409<br>count (%) | Severe<br>n= 812<br>count (%) |
| <b>Total comorbidities (excluding COPD) ≥4</b>               | 19959 (4.0)                      | 1389 (16.7)**                              | 331 (12.6)**               | 46 (11.5)                  | 191 (13.5)                      | 94 (11.6)                     |
| <b>Total number of medications</b>                           |                                  |                                            |                            |                            |                                 |                               |
| ≥1                                                           | 356406 (72.1)                    | 7670 (92.2)**                              | 2452 (93.6)**              | 352 (88.2)                 | 1321 (93.8)                     | 779 (95.9)                    |
| ≥5                                                           | 87286 (17.7)                     | 4312 (51.8)**                              | 1349 (51.5)**              | 171 (42.9)                 | 702 (49.8)                      | 476 (58.6)                    |
| ≥10                                                          | 10678 (2.2)                      | 1269 (15.3)**                              | 329 (12.6)**               | 31 (7.8)                   | 172 (12.2)                      | 126 (15.5)                    |
| <b>Prevalence of comorbidities</b>                           |                                  |                                            |                            |                            |                                 |                               |
| <b>Cardiovascular</b>                                        | <b>152891 (30.9)</b>             | <b>3957 (47.6)**</b>                       | <b>1156 (44.1)**</b>       | <b>142 (35.6)</b>          | <b>611 (43.4)</b>               | <b>403 (49.6)</b>             |
| Hypertension                                                 | 130119 (26.3)                    | 3206 (38.5)**                              | 916 (35.0)**               | 112 (28.1)                 | 483 (34.3)                      | 321 (39.5)                    |
| CHD                                                          | 21560 (4.4)                      | 1171 (14.1)**                              | 315 (12.0)**               | 31 (7.6)                   | 185 (13.1)                      | 99 (12.2)                     |
| Diabetes                                                     | 24737 (5.0)                      | 766 (9.1)**                                | 189 (7.2)**                | 16 (4.0)                   | 109 (7.7)                       | 64 (7.9)                      |
| Stroke/TIA                                                   | 8459 (1.7)                       | 395 (4.7)**                                | 98 (3.7)**                 | 11 (2.8)                   | 51 (3.6)                        | 36 (4.4)                      |
| AF                                                           | 3552 (0.7)                       | 99 (1.2)**                                 | 34 (1.3)**                 | 3 (0.8)                    | 16 (1.1)                        | 15 (1.8)                      |
| Heart failure                                                | 768 (0.2)                        | 35 (0.4)**                                 | 6 (0.2)                    | 0                          | 1 (0.1)                         | 5 (0.6)                       |
| <b>Respiratory</b>                                           |                                  |                                            |                            |                            |                                 |                               |
| Asthma                                                       | 55245 (11.2)                     | 3048 (36.6)**                              | 984 (37.6)**               | 142 (35)                   | 523 (37.1)                      | 319 (39.3)                    |
| Pulmonary embolus                                            | 4354 (0.9)                       | 264 (3.2)**                                | 65 (2.5)**                 | 12 (3.0)                   | 32 (2.2)                        | 21 (2.5)                      |
| Bronchiectasis                                               | 968 (0.2)                        | 167 (2.0)**                                | 39 (1.5)**                 | 7 (1.8)                    | 17 (1.2)                        | 15 (1.8)                      |
| Pulmonary fib.                                               | 504 (0.1)                        | 67 (0.8)**                                 | 18 (0.7)**                 | 3 (0.8)                    | 12 (0.9)                        | 3 (0.4)                       |
| <b>Cancer</b>                                                | <b>37686 (7.6)</b>               | <b>937 (11.3)</b>                          | <b>272 (10.4)</b>          | <b>47 (11.8)</b>           | <b>146 (10.4)</b>               | <b>79 (9.7)</b>               |
| Lung                                                         | 405 (0.1)                        | 52 (0.6)**                                 | 15 (0.6)**                 | 0                          | 7 (0.5)                         | 8 (1.0)                       |
| Breast                                                       | 11311 (2.3)                      | 210 (2.5)*                                 | 57 (2.2)                   | 12 (3.0)                   | 30 (2.1)                        | 15 (1.8)                      |
| Prostate                                                     | 3588 (0.7)                       | 105 (1.3)**                                | 30 (1.1)*                  | 5 (1.3)                    | 12 (0.9)                        | 13 (1.6)                      |
| GI                                                           | 2925 (0.6)                       | 96 (1.2)**                                 | 34 (1.3)**                 | 6 (1.5)                    | 19 (1.3)                        | 9 (1.1)                       |
| Haem                                                         | 6170 (1.2)                       | 124 (1.5)*                                 | 34 (1.3)                   | 5 (1.3)                    | 17 (1.2)                        | 12 (1.5)                      |
| <b>Gastrointestinal</b>                                      | <b>55635 (11.5)</b>              | <b>1737 (20.9)**</b>                       | <b>468 (17.9)**</b>        | <b>76 (19.0)</b>           | <b>254 (18.0)</b>               | <b>138 (17.0)</b>             |
| Dyspepsia                                                    | 37819 (7.7)                      | 1257 (15.1)**                              | 348 (13.3)**               | 53 (13.3)                  | 189 (13.4)                      | 106 (13.1)                    |
| Diverticular dis                                             | 5181 (1.0)                       | 224 (2.7)**                                | 54 (2.1)**                 | 6 (1.5)                    | 32 (2.3)                        | 16 (2.0)                      |
| IBS                                                          | 11203 (2.3)                      | 291 (3.5)**                                | 64 (2.4)**                 | 17 (4.3)                   | 35 (2.5)                        | 12 (1.5)                      |
| CLD                                                          | 935 (0.2)                        | 36 (0.4)**                                 | 10 (0.4)*                  | 2 (0.5)                    | 10 (0.7)                        | 3 (0.4)                       |
| <b>Mental Health</b>                                         | <b>35822 (7.2)</b>               | <b>1127 (13.6)**</b>                       | <b>304 (11.6)**</b>        | <b>54 (13.5)</b>           | <b>162 (11.5)</b>               | <b>88 (10.8)</b>              |
| Depression                                                   | 27578 (5.6)                      | 901 (10.8)**                               | 233 (8.9)**                | 42 (10.5)                  | 128 (9.1)                       | 63 (7.8)                      |
| Anxiety                                                      | 8781 (1.8)                       | 245 (2.9)**                                | 69 (2.6)**                 | 13 (3.3)                   | 36 (2.6)                        | 20 (2.5)                      |
| Schizophrenia/<br>bipolar                                    | 1918 (0.4)                       | 79 (0.9)**                                 | 27 (1.0)**                 | 3 (0.7)                    | 15 (1.1)                        | 9 (1.1)                       |
| <b>Other</b>                                                 |                                  |                                            |                            |                            |                                 |                               |
| Other painful                                                | 81733 (16.5)                     | 2259 (27.2)**                              | 655 (25.0)**               | 115 (28.8)                 | 367 (26.0)                      | 173 (21.3)                    |
| Osteoporosis                                                 | 7700 (1.6)                       | 342 (4.1)**                                | 128 (4.9)**                | 21 (5.3)                   | 67 (4.8)                        | 40 (4.9)                      |
| Connective tissue<br>disease                                 | 10642 (2.2)                      | 391 (4.7)**                                | 112 (4.3)**                | 19 (4.8)                   | 72 (5.1)                        | 21 (2.6)                      |

Compared with control ( $\chi^2$ ): \* : p<0.05, \*\* : p<0.001

1  
2  
3 Morbidity counts (excluding COPD) and counts of prescribed medication are shown in table 2  
4  
5 comparing those with COPD, stratified by severity of airflow obstruction, with those without. Those  
6  
7 with COPD had higher numbers of LTCs and more prescribed medications than those without. There  
8  
9 was a trend towards more prescribed medications in those with greater severity of airway  
10  
11 obstruction. After controlling for age, sex and socioeconomic status, those with self- report COPD  
12  
13 were more likely to report  $\geq 4$  LTCs (3.49; 3.28 to 3.71),  $\geq 5$  medications (3.85; 3.68 to 4.03), and  $\geq 10$   
14  
15 medications (5.72; 5.36 to 6.10) than those without COPD. Results were similar for GOLD COPD and  
16  
17 remained statistically significant after adjusting for smoking status, alcohol frequency, BMI and  
18  
19 physical activity (appendix 3).  
20

### 21 22 **ADR Risk**

23  
24  
25 Counts and percentages of participants taking specific medications are shown in appendix 4.  
26  
27 Participants with COPD (self-report and GOLD) were more likely than those without COPD to be  
28  
29 prescribed drugs across a range of disease areas, reflecting the range of LTCs present among those  
30  
31 with COPD. The percentages of participants within each category (no COPD, COPD, and COPD with  
32  
33 specific LTCs) taking three or more medications associated with a similar ADR is shown in Figure 2.  
34  
35 For each category of ADR a higher proportion of participants with COPD reported taking three or  
36  
37 more associated medications than those without COPD. This increased further with multimorbidity.  
38  
39 Participants with COPD plus cardiovascular disease had the highest percentage taking three or more  
40  
41 medications with a risk of falls or renal injury. Participants with COPD plus mental health conditions  
42  
43 had the highest percentages taking three or more medications with a risk of constipation, CNS  
44  
45 depression or bleeding.  
46  
47  
48  
49  
50  
51

52 After adjusting for age, sex and socioeconomic deprivation, those with self-report COPD remained  
53  
54 more likely to be taking three or more medications in each category than those without COPD. These  
55  
56  
57  
58  
59

findings remained statistically significant after adjusting for smoking status, alcohol frequency, BMI and physical activity (Table 3). Findings were similar for GOLD COPD however, after adjusting for additional potentially confounding variables, results for bleeding risk were not statistically significant in this sensitivity analysis (Table 3).

| <b>Table 3. Odds ratios (with 95% CI) for taking 3 of more medications associated with similar ADRs</b> |                                                     |                      |                                              |                      |
|---------------------------------------------------------------------------------------------------------|-----------------------------------------------------|----------------------|----------------------------------------------|----------------------|
| ADR                                                                                                     | Self-report COPD compared with no COPD<br>N=502,640 |                      | GOLD COPD compared with no COPD<br>N=496,943 |                      |
|                                                                                                         | Model 1<br>N=502,013                                | Model 2<br>N=487,718 | Model 1<br>N=496,943                         | Model 2<br>N=482,378 |
|                                                                                                         | OR (95% CI)                                         | OR (95% CI)          | OR (95% CI)                                  | OR (95% CI)          |
| Falls                                                                                                   | 2.27 (2.13 – 2.42) ***                              | 1.83 (1.71-1.96) *** | 1.66 (1.47 – 1.87) ***                       | 1.49 (1.30-1.69) *** |
| Constipation                                                                                            | 2.71 (2.54 – 2.89) ***                              | 2.66 (2.39-2.96) *** | 2.18 (1.77 – 2.64) ***                       | 1.82 (1.47-2.24) *** |
| Urinary retention                                                                                       | 3.38 (2.94 – 3.87) ***                              | 2.59 (2.22-3.0) ***  | 1.98 (1.44 – 2.64) ***                       | 1.64 (1.18-2.21) **  |
| CNS depression                                                                                          | 3.75 (3.31 – 4.25) ***                              | 2.81 (2.45-3.22) *** | 2.29 (1.73 – 2.95) ***                       | 1.87 (1.40-2.43) *** |
| Bleeding                                                                                                | 4.60 (3.35 – 6.19) ***                              | 3.39 (2.40-4.66) *** | 2.63 (1.25 – 4.80) **                        | 1.76 (0.75-3.48) §   |
| Renal injury                                                                                            | 2.22 (1.86 – 2.62) ***                              | 1.84 (1.53-2.19) *** | 1.94 (1.41 – 2.58) ***                       | 1.84 (1.33-2.49) *** |

§ : p>0.05 \* : p<0.05, \*\* : p<0.01, \*\*\* : p<0.001  
 Model 1: Adjusted for age, sex and socioeconomic status  
 Model 2: Adjusted for age, sex, socioeconomic status, smoking, alcohol frequency, body mass index and physical activity

Finally, each category of ADR risk was assessed in a subgroup analysis for each category of LTC (cardiovascular, GI, cancer, mental health and painful conditions/inflammatory arthropathies) comparing those with and without COPD (e.g. participants with cardiovascular disease plus COPD compared with participants with cardiovascular disease alone, etc.). These models were adjusted for age, sex and socioeconomic status only. Within each category of LTC, those with self-reported COPD were more likely to be at risk of each ADR than those without COPD (appendix 3). Not all results were statistically significant when using GOLD COPD (Appendix 3).



## DISCUSSION

### Summary of main findings

Multimorbidity and polypharmacy in COPD were common among UK Biobank participants. The presence of multimorbidity was highly prevalent in those with COPD (85%). More than half (52%) reported polypharmacy (five or more medications), and 15% reported 10 or more medications. The prevalence of cardiovascular disease, as well as the degree of polypharmacy, was higher among those with more severe airflow obstruction.

For the first time, our data demonstrates that those with COPD were more likely than those without to be prescribed multiple medications ( $\geq$  three) with similar ADRs. Those with COPD plus cardiovascular disease were most likely to be taking multiple medications associated with increased risk of falls or renal injury, while those with COPD plus mental health conditions were most likely to be taking medications predisposing to constipation, CNS depression and bleeding.<sup>(52)</sup> Within each category of LTC, those with COPD were more likely to be taking multiple medications with similar ADRs than those without. These associations between patterns of multimorbidity and specific ADR risks have not been described or quantified previously.

### Strengths and limitations

Strengths of this study include the large sample size with representation from different areas of the UK. The range of data collected at UK Biobank assessment centres meant it was possible to compare a range of sociodemographic characteristics as well as spirometry data, the latter being unusual for a large community based cohort. It is recognised, however, that UK Biobank participants show some evidence of 'healthy volunteer bias', differing from the UK average on a number of socioeconomic, lifestyle and health-related measures. Specifically they are less socioeconomically deprived, less likely to smoke, to be obese, and have fewer self-reported health conditions.<sup>(53)</sup> All LTC diagnoses

1  
2  
3 as well as medication data were self-reported, with no alternative means of verification. We  
4  
5 attempted to minimise this limitation by identifying a subset of those with COPD meeting the GOLD  
6  
7 diagnostic criteria and repeating the analyses with this subset. Importantly, spirometry values were  
8  
9 also pre-bronchodilator, which is in contravention to guidelines for diagnosing COPD. Additionally,  
10  
11 information was not available about the strength of indication for medications and individual  
12  
13 susceptibility to risk, which is a limitation when considering the risk of ADRs.  
14  
15

16 The use of the Scottish Government Polypharmacy Guideline allowed analysis of potential ADR risk  
17  
18 by specific common ADRs. The intended purpose of this guideline, however, was not to identify  
19  
20 potential risk from a population sample, but rather to identify potential causes of symptoms or  
21  
22 complications. The analysis in this study, therefore, serves only as an approximation of potential risk,  
23  
24 not an absolute marker of inappropriate polypharmacy. The cross-sectional nature of this analysis  
25  
26 also precludes an analysis of actual harm as a result of polypharmacy. Many of the potential ADRs,  
27  
28 such as falls and fractures and renal injury, and frequently multifactorial events and may not be  
29  
30 directly attributable to medication use. Despite these limitations, however, the co-prescription of  
31  
32 multiple medications with similar ADRs strongly implies greater potential for harm. The association  
33  
34 of such prescribing patterns with COPD, across a range of potential ADRs, is clear from our findings.  
35  
36 This analysis is, to the author's knowledge, the first to attempt to quantify this risk for specific ADRs  
37  
38 in this way.  
39  
40  
41  
42  
43  
44

### 45 **Context and implications**

46  
47  
48 The increased prevalence of individual LTCs such as coronary heart disease, hypertension, diabetes,  
49  
50 dyspepsia, osteoporosis, cancer, depression and anxiety in those with COPD is similar to the findings  
51  
52 from other population based studies of multimorbidity in COPD.(5, 11, 54-56) Our finding that  
53  
54 cardiovascular disease prevalence increased with increasing severity of COPD is in keeping with the  
55  
56  
57  
58  
59  
60

1  
2  
3 body of literature on cardiovascular disease and COPD, in which high prevalence has been observed  
4  
5 in (usually older) cohorts with severe airflow limitation.(5, 21) Greater polypharmacy with greater  
6  
7 severity of COPD has also been observed previously in older COPD populations,(43, 57) although  
8  
9 such analyses have been smaller (n=1859 and 398, respectively) and have not assessed the specific  
10  
11 patterns of prescribing in COPD. To the best of our knowledge, no previous studies have assessed  
12  
13 the risk of ADRs as a result of polypharmacy in COPD. A recent population-based analysis of  
14  
15 prescribing data from 310,000 adults in Scotland showed that over 15 years from 1995 to 2010 the  
16  
17 proportion of people with polypharmacy and with potentially serious drug-to-drug interactions  
18  
19 increased dramatically.(37) The number of prescribed medications was also associated with  
20  
21 increased risk of interactions. Our analysis differs in approach from this analysis, by seeking to  
22  
23 identify patterns of prescribing increasing risk of specific adverse events, rather than counting total  
24  
25 potential interactions. The strength of our approach lies in highlighting specific patterns of  
26  
27 multimorbidity in which specific ADRs are more likely. Our findings can therefore be applied to  
28  
29 clinical practice, highlighting the importance of recognising multimorbidity in COPD and being alert  
30  
31 to specific ADRs when prescribing medication.  
32  
33  
34  
35  
36  
37

38 Our findings indicate that in those with COPD the potential for ADRs as a result of combinations of  
39  
40 medications is high, and this appears to be the result of a high prevalence of extra-pulmonary LTCs.  
41  
42 Clinical guidelines for COPD should place greater emphasis on the need for assessment of associated  
43  
44 multimorbidity and the risk of associated ADRs. While our analysis shows potential areas where ADR  
45  
46 risk exists in COPD (e.g. falls in those with concomitant cardiovascular disease, CNS depression,  
47  
48 constipation with concomitant mental health conditions), future research is merited to assess what  
49  
50 actual harm could be attributed to such prescribing patterns.  
51  
52

### 53 **Conclusion**

54  
55  
56  
57  
58  
59  
60

1  
2  
3 Among UK Biobank participants with COPD there was considerable multimorbidity and  
4 polypharmacy. Those with COPD were highly likely to be concurrently prescribed multiple  
5 medications with similar potential adverse effects. Medications contributing to this risk were  
6 largely indicated for the management of the associated morbidities rather than COPD. Future  
7 research should examine the effects on healthcare outcomes of co-prescribing of multiple drugs  
8 with similar potential of ADRs. Clinical guidelines for COPD should emphasise the need for  
9 assessment of multimorbidity and the risk of associated ADRs.  
10  
11  
12  
13  
14  
15  
16  
17  
18  
19  
20

### 21 **Figure Legends**

22  
23  
24 **Figure 1:** Flow diagram of identification of participants with 'self-report COPD' and 'GOLD COPD'.  
25

26  
27 **Figure 2:** Bubble plot showing percentage of participants in each comorbidity category taking 3 or  
28 more concomitant medications associated with specific adverse drug reactions.  
29  
30

### 31 32 33 34 35 36 37 **Ethics approval and consent to participate**

38  
39  
40 Participants provided full informed consent to participate in UK Biobank and this study was covered  
41 by the generic ethical approval for UK Biobank studies from the NHS National Research Ethics  
42 Service (Ref 16/NW/0274).  
43  
44  
45  
46  
47  
48  
49

### 50 **Availability of data and materials**

51  
52  
53 UK Biobank data is available via [www.ukbiobank.ac.uk](http://www.ukbiobank.ac.uk). Syntax for the generation of derived  
54 variables and for the analysis used for this study will be submitted to UK Biobank for record.  
55  
56  
57

### Competing interests

The authors declare that they have no competing interests

### Funding

This study was supported by a CSO Catalyst Grant CGA/16/39. BDJ was funded by a NHS Research for Scotland career research fellowship.

### Author contributions

All authors (PH, BN, BJ, RM, DL, KG and FM) were involved in the conceptualisation and design of the project and interpretation of results. PH carried out the analysis with support from BJ, RM and BN. DL provided statistical support. All authors had access to the data. PH wrote the first draft of the paper and all authors commented on subsequent drafts. All authors approved the final draft for publication. FM is guarantor.

### Acknowledgements

This research has been conducted using the UK Biobank Resource, approved project number 14151.

### References

1. Anecchino C, Rossi E, Fanizza C, et al. Prevalence of chronic obstructive pulmonary disease and pattern of comorbidities in a general population. *International journal of chronic obstructive pulmonary disease*. 2007;2(4):567-74.
2. Fumagalli G, Fabiani F, Forte S, et al. INDACO project: a pilot study on incidence of comorbidities in COPD patients referred to pneumology units. *Multidisciplinary Respiratory Medicine*. 2013;8.
3. Putcha N, Puhan MA, Hansel NN, et al. Impact of co-morbidities on self-rated health in self-reported COPD: An analysis of NHANES 2001-2008. *Copd-Journal of Chronic Obstructive Pulmonary Disease*. 2013;10(3):324-32.
4. Garcia-Olmos L, Alberquilla A, Ayala V, et al. Comorbidity in patients with chronic obstructive pulmonary disease in family practice: a cross sectional study. *BMC family practice*. 2013;14.
5. Chen W, Thomas J, Sadatsafavi M, et al. Risk of cardiovascular comorbidity in patients with chronic obstructive pulmonary disease: a systematic review and meta-analysis. *Lancet Respir Med*. 2015;3(8):631-9.
6. Rodriguez DA, Garcia-Aymerich J, Valera JL, et al. Determinants of exercise capacity in obese and non-obese COPD patients. *Respiratory Medicine*. 2014;108(5):745-51.
7. Al-shair K, Dockry R, Mallia-Milanes B, et al. Depression and its relationship with poor exercise capacity, BODE index and muscle wasting in COPD. *Respiratory Medicine*. 2009;103(10):1572-9.
8. Di Marco F, Verga M, Reggente M, et al. Anxiety and depression in COPD patients: The roles of gender and disease severity. *Respiratory Medicine*. 2006;100(10):1767-74.
9. Qian J, Simoni-Wastila L, Rattinger GB, et al. Associations of depression diagnosis and antidepressant treatment with mortality among young and disabled Medicare beneficiaries with COPD. *General Hospital Psychiatry*. 2013;35(6):612-8.
10. Atlantis E, Fahey P, Cochrane B, et al. Bidirectional Associations Between Clinically Relevant Depression or Anxiety and COPD A Systematic Review and Meta-analysis. *Chest*. 2013;144(3):766-77.
11. Bor S, Kitapcioglu G, Solak ZA, et al. Prevalence of gastroesophageal reflux disease in patients with asthma and chronic obstructive pulmonary disease. *Journal of Gastroenterology and Hepatology*. 2010;25(2):309-13.
12. Garcia Rodriguez LA, Ruigomez A, Martin-Merino E, et al. Relationship Between Gastroesophageal Reflux Disease and COPD in UK Primary Care. *Chest*. 2008;134(6):1223-30.
13. Kim J, Lee JH, Kim Y, et al. Association between chronic obstructive pulmonary disease and gastroesophageal reflux disease: a national cross-sectional cohort study. *Bmc Pulmonary Medicine*. 2013;13.
14. Ferguson GT, Calverley PMA, Anderson JA, et al. Prevalence and Progression of Osteoporosis in Patients With COPD Results From the Towards a Revolution in COPD Health Study. *Chest*. 2009;136(6):1456-65.
15. Jorgensen NR, Schwarz P, Holme I, et al. The prevalence of osteoporosis in patients with chronic obstructive pulmonary disease - A cross sectional study. *Respiratory Medicine*. 2007;101(1):177-85.
16. Ogura-Tomomatsu H, Asano K, Tomomatsu K, et al. Predictors of Osteoporosis and Vertebral Fractures in Patients Presenting with Moderate-to-Severe Chronic Obstructive Lung Disease. *Copd-Journal of Chronic Obstructive Pulmonary Disease*. 2012;9(4):332-7.
17. Young RP, Hopkins RJ, Christmas T, et al. COPD prevalence is increased in lung cancer, independent of age, sex and smoking history. *European Respiratory Journal*. 2009;34(2):380-6.
18. Wilson DO, Weissfeld JL, Balkan A, et al. Association of radiographic emphysema and airflow obstruction with lung cancer. *American Journal of Respiratory and Critical Care Medicine*. 2008;178(7):738-44.
19. Garcia-Rio F, Soriano JB, Miravittles M, et al. Impact of Obesity on the Clinical Profile of a Population-Based Sample with Chronic Obstructive Pulmonary Disease. *Plos One*. 2014;9(8).

20. Cecere LM, Littman AJ, Slatore CG, et al. Obesity and COPD: Associated Symptoms, Health-related Quality of Life, and Medication Use. *Copd-Journal of Chronic Obstructive Pulmonary Disease*. 2011;8(4):275-84.
21. Mannino DM, Thorn D, Swensen A, et al. Prevalence and outcomes of diabetes, hypertension and cardiovascular disease in COPD. *European Respiratory Journal*. 2008;32(4):962-9.
22. Curkendall SM, DeLuise C, Jones JK, et al. Cardiovascular disease in patients with chronic obstructive pulmonary disease, Saskatchewan Canada cardiovascular disease in COPD patients. *Annals of Epidemiology*. 2006;16(1):63-70.
23. McGarvey LP, John M, Anderson JA, et al. Ascertainment of cause-specific mortality in COPD: operations of the TORCH Clinical Endpoint Committee. *Thorax*. 2007;62(5):411-5.
24. Zielinski J, MacNee W, Wedzicha J, et al. Causes of death in patients with COPD and chronic respiratory failure. *Monaldi archives for chest disease = Archivio Monaldi per le malattie del torace*. 1997;52(1):43-7.
25. Mannino DM, Doherty DE, Buist AS. Global Initiative on Obstructive Lung Disease (GOLD) classification of lung disease and mortality: findings from the Atherosclerosis Risk in Communities (ARIC) study. *Respiratory Medicine*. 2006;100(1):115-22.
26. Campo G, Guastaroba P, Marzocchi A, et al. Impact of COPD on Long-term Outcome After ST-Segment Elevation Myocardial Infarction Receiving Primary Percutaneous Coronary Intervention. *Chest*. 2013;144(3):750-7.
27. Konecny T, Somers K, Orban M, et al. Interactions Between COPD and Outcomes After Percutaneous Coronary Intervention. *Chest*. 2010;138(3):621-7.
28. Sidney S, Sorel M, Quesenberry CP, et al. COPD and incident cardiovascular disease hospitalizations and mortality: Kaiser permanente medical care program. *Chest*. 2005;128(4):2068-75.
29. Sakae TM, Menezes Pizzichini MM, et al. Exacerbations of COPD and symptoms of gastroesophageal reflux: a systematic review and meta-analysis. *Jornal Brasileiro De Pneumologia*. 2013;39(3):259-71.
30. Hattiholi J, Gaude GS. Prevalence and correlates of osteoporosis in chronic obstructive pulmonary disease patients in India. *Lung India : official organ of Indian Chest Society*. 2014;31(3):221-7.
31. Miller J, Edwards LD, Agusti A, et al. Comorbidity, systemic inflammation and outcomes in the ECLIPSE cohort. *Respiratory Medicine*. 2013;107(9):1376-84.
32. Divo M, Cote C, de Torres JP, et al. Comorbidities and Risk of Mortality in Patients with Chronic Obstructive Pulmonary Disease. *American Journal of Respiratory and Critical Care Medicine*. 2012;186(2):155-61.
33. Budweiser S, Harlacher M, Pfeifer M. Co-morbidities and hyperinflation are independent risk factors of all-cause mortality in very severe COPD. *COPD*. 2014;11(4):388-400.
34. Barnett K, Mercer SW, Norbury M, et al. Epidemiology of Multimorbidity and Implications for Health Care, Research, and Medical Education: a Cross-Sectional Study. *Lancet*. 2012;380(9836):37-43.
35. National Institute for Health and Care Excellence (NICE). Multimorbidity: clinical assessment and management (NICE Guideline 56). 2016. <https://www.nice.org.uk/guidance/ng56> (accessed Nov 2017)
36. Corsonello A, Pedone C, Corica F. Polypharmacy in elderly patients at discharge from the acute care hospital. *Therapeutics and Clinical Risk Management*. 2007;2007(3):1.
37. Guthrie B, Makubate B, Hernandez-Santiago V, et al. The rising tide of polypharmacy and drug-drug interactions: population database analysis 1995-2010. *BMC Medicine*. 2015;13:74.
38. Bourgeois FT, Shannon MW, Valim C, et al. Adverse drug events in the outpatient setting: an 11-year national analysis. *Pharmacoepidemiol Drug Saf*. 2010;19(9):901-10.



39. Johnell K, Klarin I. The relationship between number of drugs and potential drug-drug interactions in the elderly: a study of over 600,000 elderly patients from the Swedish Prescribed Drug Register. *Drug Saf*. 2007;30(10):911-8.
40. Pirmohamed M, James S, Meakin S, et al. Adverse drug reactions as cause of admission to hospital: prospective analysis of 18 820 patients. *BMJ*. 2004;329(7456):15-9.
41. Howard RL, Avery AJ, Slavenburg S, et al. Which drugs cause preventable admissions to hospital? A systematic review. *British Journal of Clinical Pharmacology*. 2007;63(2):136-47.
42. Nobili A, Marengoni A, Tettamanti M, et al. Association between clusters of diseases and polypharmacy in hospitalized elderly patients: results from the REPOSI study. *European Journal of Internal Medicine*. 2011;22(6):597-602.
43. Franssen FM, Spruit MA, Wouters EF. Determinants of polypharmacy and compliance with GOLD guidelines in patients with chronic obstructive pulmonary disease. *Int J Chron Obstruct Pulmon Dis*. 2011;6:493-501.
44. Patel A. Extrapulmonary Polypharmacy and Cardiovascular Medications in COPD. *Thorax*. 2009;64(Suppl IV):A5-A74.
45. UK Biobank data field 6164 [Available from: <http://biobank.ctsu.ox.ac.uk/crystal/field.cgi?id=6164>] (accessed Nov 2017)
46. Miller MR, Hankinson J, Brusasco V, B et al. Standardisation of spirometry. *European Respiratory Journal*. 2005;26(2):319-38.
47. Qaseem A, Wilt TJ, Weinberger SE, et al. Diagnosis and management of stable chronic obstructive pulmonary disease: a clinical practice guideline update from the American College of Physicians, American College of Chest Physicians, American Thoracic Society, and European Respiratory Society. *Annals of internal medicine*. 2011;155(3):179-91.
48. Global Initiative for Chronic Obstructive Lung Disease (GOLD). From the Global Strategy for the Diagnosis, Management and Prevention of COPD, Global Initiative for Chronic Obstructive Lung Disease (GOLD) 2017 2017 [Available from: Available from: <http://goldcopd.org>. (accessed Nov 2017)
49. Hankinson JL, Odencrantz JR, Fedan KB. Spirometric reference values from a sample of the general U.S. population. *American Journal of Respiratory & Critical Care Medicine*. 1999;159(1):179-87.
50. Nicholl BI, Mackay D, Cullen B, et al. Chronic multisite pain in major depression and bipolar disorder: cross-sectional study of 149,611 participants in UK Biobank. *BMC Psychiatry*. 2014;14:350.
51. British National Formulary Version 70: BMJ Group and Royal Pharmaceutical Society of Great Britain; 2015.
52. Scottish Government Model of Care Polypharmacy Working Group. Polypharmacy Guidance (2nd edition). March 2015. Scottish Government
53. Fry A, Littlejohns TJ, Sudlow C, et al. The representativeness of the UK Biobank cohort on a range of sociodemographic, physical, lifestyle and health-related characteristics. *Journal of epidemiology and community health*. 2016;70(Suppl 1):A26-A.
54. Putcha N, Han MK, Martinez CH, et al. Comorbidities of COPD have a major impact on clinical outcomes, particularly in African Americans. *Chronic obstructive pulmonary diseases (Miami, Fla)*. 2014;1(1):105-14.
55. Bhattacharyya P, Paul R, Ghosh M, et al. Prevalence of osteoporosis and osteopenia in advanced chronic obstructive pulmonary disease patients. *Lung India : official organ of Indian Chest Society*. 2011;28(3):184-6.
56. de Torres JP, Bastarrika G, Wisnivesky JP, et al. Assessing the relationship between lung cancer risk and emphysema detected on low-dose CT of the chest. *Chest*. 2007;132(6):1932-8.
57. Diez-Manglano J, Barquero-Romero J, Mena PA, et al. Polypharmacy in patients hospitalised for acute exacerbation of COPD. *European Respiratory Journal*. 2014;44(3):791-4.



1  
2  
3  
4  
5  
6  
7  
8  
9  
10  
11  
12  
13  
14  
15  
16  
17  
18  
19  
20  
21  
22  
23  
24  
25  
26  
27  
28  
29  
30  
31  
32  
33  
34  
35  
36  
37  
38  
39  
40  
41  
42  
43  
44  
45  
46  
47  
48  
49  
50  
51  
52  
53  
54  
55  
56  
57  
58  
59  
60

For peer review only

1  
2  
3  
4  
5  
6  
7  
8  
9  
10  
11  
12  
13  
14  
15  
16  
17  
18  
19  
20  
21  
22  
23  
24  
25  
26  
27  
28  
29  
30  
31  
32  
33  
34  
35  
36  
37  
38  
39  
40  
41  
42  
43  
44  
45  
46  
47  
48  
49  
50  
51  
52  
53  
54  
55  
56  
57  
58  
59  
60



Flow diagram of identification of participants with 'self-report COPD' and 'GOLD COPD'.

190x142mm (300 x 300 DPI)



Bubble plot showing percentage of participants in each comorbidity category taking 3 or more concomitant medications associated with specific adverse drug reactions.

209x148mm (300 x 300 DPI)

| Comorbidity category (used in analysis) | Conditions included (as reported in table 2) | Self-reported conditions comprising this condition (UK Biobank variables used to identify self-reported conditions)                                                                                              |
|-----------------------------------------|----------------------------------------------|------------------------------------------------------------------------------------------------------------------------------------------------------------------------------------------------------------------|
| Cardiovascular conditions               | Hypertension                                 | Hypertension<br>Essential hypertension                                                                                                                                                                           |
|                                         | Coronary heart disease                       | Heart attack/MI<br>Angina                                                                                                                                                                                        |
|                                         | Diabetes                                     | Diabetic nephropathy<br>Diabetic neuropathy/ulcers<br>Diabetes<br>Type 1 diabetes<br>Type 2 diabetes<br>Diabetic eye disease                                                                                     |
|                                         | Stroke/TIA                                   | Stroke<br>TIA<br>Subarachnoid haemorrhage<br>Brain haemorrhage<br>Ischaemic stroke                                                                                                                               |
|                                         | Atrial fibrillation                          | Atrial fibrillation                                                                                                                                                                                              |
|                                         | Heart failure                                | Cardiomyopathy<br>Hypertrophic cardiomyopathy<br>Heart failure/pulmonary oedema                                                                                                                                  |
|                                         | Peripheral vascular disease                  | Peripheral vascular disease<br>Leg claudication/intermittent claudication                                                                                                                                        |
| Respiratory                             | COPD                                         | COPD/Chronic obstructive pulmonary disease<br>Emphysema/Chronic bronchitis<br>Emphysema                                                                                                                          |
|                                         | Asthma                                       | Asthma                                                                                                                                                                                                           |
|                                         | PE/DVT                                       | Deep vein thrombosis<br>Pulmonary embolism                                                                                                                                                                       |
|                                         | Bronchiectasis                               | Bronchiectasis                                                                                                                                                                                                   |
|                                         | Pulmonary fibrosis                           | Pulmonary fibrosis                                                                                                                                                                                               |
| Cancer                                  | Cancer                                       | "yes"/"no" to "have you ever had cancer?"                                                                                                                                                                        |
| Gastrointestinal                        | Dyspepsia                                    | Gastro-oesophageal reflux (GORD)<br>Oesophagitis/Barrett's oesophagus<br>Gastric stomach ulcers<br>Gastric erosions/gastritis<br>Duodenal ulcer<br>Dyspepsia/indigestion<br>Hiatus hernia<br>Helicobacter pylori |
|                                         | Diverticular disease                         | Diverticular disease/diverticulitis                                                                                                                                                                              |

|                    |                            |                                                                                                                                                                                                                                                                                                 |
|--------------------|----------------------------|-------------------------------------------------------------------------------------------------------------------------------------------------------------------------------------------------------------------------------------------------------------------------------------------------|
|                    | Irritable bowel syndrome   | Irritable bowel syndrome                                                                                                                                                                                                                                                                        |
|                    | Chronic liver disease      | Oesophageal varices<br>Non infective hepatitis<br>Liver failure/cirrhosis<br>Primary biliary cirrhosis                                                                                                                                                                                          |
|                    | Inflammatory bowel disease | Inflammatory bowel disease<br>Crohn's disease<br>Ulcerative colitis                                                                                                                                                                                                                             |
|                    | Constipation               | Constipation                                                                                                                                                                                                                                                                                    |
|                    | Viral hepatitis            | Hepatitis B<br>Hepatitis C<br>Hepatitis D                                                                                                                                                                                                                                                       |
| Mental Health      | Depression                 | Depression<br>Postnatal depression                                                                                                                                                                                                                                                              |
|                    | Anxiety                    | Anxiety/panic attacks<br>Nervous breakdown<br>Post-traumatic stress disorder<br>Obsessive compulsive disorder<br>Stress<br>Insomnia<br>Psychological/psychiatric problem                                                                                                                        |
|                    | Schizophrenia              | Schizophrenia                                                                                                                                                                                                                                                                                   |
|                    | Bipolar                    | Mania<br>Bipolar disorder<br>Manic depression                                                                                                                                                                                                                                                   |
| Painful conditions | Connective tissue diseases | Myositis/myopathy<br>Systemic lupus erythematosus/SLE<br>Connective tissue disorder<br>Sjogren's syndrome.sicca syndrome<br>Dermatopolymyositis<br>Scleroderma/systemic sclerosis<br>Rheumatoid arthritis<br>Psoriatic arthropathy<br>Dermatomyositis<br>Polymyositis<br>Polymyalgia rheumatica |
|                    | Other painful conditions   | Back pain<br>Joint pain<br>Headaches (not migraine)<br>Sciatica<br>Plantar fasciitis<br>Carpal tunnel syndrome<br>Fibromyalgia<br>Arthritis<br>Shingles<br>Disc problem<br>Prolapsed disc/slipped disc                                                                                          |

1  
2  
3  
4  
5  
6  
7  
8  
9  
10  
11  
12  
13  
14  
15  
16  
17  
18  
19  
20  
21  
22  
23  
24  
25  
26  
27  
28  
29  
30  
31  
32  
33  
34  
35  
36  
37  
38  
39  
40  
41  
42  
43  
44  
45  
46  
47  
48  
49  
50  
51  
52  
53  
54  
55  
56  
57  
58  
59  
60

|       |              |                                                                                                                                                                                                        |
|-------|--------------|--------------------------------------------------------------------------------------------------------------------------------------------------------------------------------------------------------|
|       |              | Spine arthritis/spondylitis<br>Ankylosing spondylitis<br>Back problem<br>Osteoarthritis<br>Gout<br>Cervical spondylosis<br>Trigeminal neuralgia<br>Disc degeneration<br>Trapped nerve/compressed nerve |
| Other | Osteoporosis | Osteoporosis                                                                                                                                                                                           |

For peer review only

| Drugs with cumulative risk of Adverse Drug Reactions* |                                                                                                                                                                                                                                                                                                                                                                                                                                                                                                                                                      |
|-------------------------------------------------------|------------------------------------------------------------------------------------------------------------------------------------------------------------------------------------------------------------------------------------------------------------------------------------------------------------------------------------------------------------------------------------------------------------------------------------------------------------------------------------------------------------------------------------------------------|
| Adverse Drug Reaction                                 | Contributing drug classes (participants taking 3 or more considered 'at risk' for the purposes of analysis)                                                                                                                                                                                                                                                                                                                                                                                                                                          |
| Falls                                                 | H2-receptor blockers<br>Loperamide<br>Prochlorperazine<br>Metoclopramide<br>ACE-inhibitor/Angiotensin receptor blocker<br>Thiazide diuretic<br>Loop diuretic<br>Amiloride/triamterene<br>Spironolactone<br>Beta-blocker<br>Calcium-channel blocker<br>Nitrates or nicorandil<br>Digoxin<br>Oral steroids<br>Opiates<br>Benzodiazepines<br>Sedative antihistamines<br>H1-receptor blockers<br>Antipsychotics<br>Tricyclic antidepressants<br>Sulfonylureas/gliptins/glinides<br>Pioglitazone<br>Urinary antispasmodics<br>Dosulepin<br>Alpha-blockers |
| Constipation                                          | H2-receptor blockers<br>Laxatives<br>Loperamide<br>Prochlorperazine<br>Thiazide diuretics<br>Loop diuretics<br>Calcium-channel blockers<br>Opiates<br>Sedative antihistamines<br>H1-receptor blockers<br>Antipsychotics<br>Tricyclic antidepressants<br>Urinary antispasmodics<br>Dosulepin                                                                                                                                                                                                                                                          |
| Urinary retention                                     | H2-receptor blockers<br>Loperamide<br>Prochlorperazine<br>Opiates<br>Sedative antihistamines<br>H1-receptor blockers<br>Antipsychotics<br>Tricyclic antidepressants                                                                                                                                                                                                                                                                                                                                                                                  |

|                                                                                                                                                                   |                                                                                                                                                                                                                                                |
|-------------------------------------------------------------------------------------------------------------------------------------------------------------------|------------------------------------------------------------------------------------------------------------------------------------------------------------------------------------------------------------------------------------------------|
|                                                                                                                                                                   | Urinary antispasmodics<br>Dosulepin                                                                                                                                                                                                            |
| CNS depression                                                                                                                                                    | H2-receptor blockers<br>Loperamide<br>Prochlorperazine<br>Oral steroids<br>Opiates<br>Benzodiazepines<br>Sedative antihistamines<br>H1-receptor blockers<br>Antipsychotics<br>Tricyclic antidepressants<br>Urinary antispasmodics<br>Dosulepin |
| Bleeding                                                                                                                                                          | Aspirin<br>Clopidogrel<br>Other antiplatelets<br>Oral steroids<br>SSRIs and related drugs<br>Non-steroidal anti-inflammatory drugs<br>Warfarin                                                                                                 |
| Renal injury                                                                                                                                                      | ACE-inhibitor/angiotensin receptor blockers<br>Thiazide diuretic<br>Loop diuretic<br>Amiloride/triamterene<br>Spironolactone<br>Antibiotics/antifungals<br>Non-steroidal anti-inflammatory drugs                                               |
| Adapted from <i>Scottish Government Model of Care Polypharmacy Working Group. Polypharmacy Guidance (2<sup>nd</sup> edition) March 2015. Scottish Government.</i> |                                                                                                                                                                                                                                                |



1  
2  
3  
4  
5  
6  
7  
8  
9  
10  
11  
12  
13  
14  
15  
16  
17  
18  
19  
20

| Comorbidity category     | Self-report COPD compared with no COPD<br>N=502,640 |                      | GOLD COPD compared with no COPD<br>N=496,943 |                      |
|--------------------------|-----------------------------------------------------|----------------------|----------------------------------------------|----------------------|
|                          | Model 1<br>N=502,013                                | Model 2<br>N=487,718 | Model 1<br>N=496,324                         | Model 2<br>N=482,378 |
|                          | OR (95% CI)                                         | OR (95% CI)          | OR (95% CI)                                  | OR (95% CI)          |
| Cardiovascular disease   | 1.45 (1.39-1.52) ***                                | 1.28 (1.22-1.34) *** | 1.11 (1.02-1.20) *                           | 1.08 (0.99-1.18) §   |
| Cancer                   | 1.29 (1.20-1.39) ***                                | 1.22 (1.13-1.31) *** | 1.12 (0.99-1.27) §                           | 1.06 (0.92-1.19) §   |
| Gastrointestinal disease | 1.76 (1.67-1.86) ***                                | 1.56 (1.48-1.65) *** | 1.4 (1.26-1.54) ***                          | 1.24 (1.12-1.38) *** |
| Mental health            | 2.02 (1.89-2.15) ***                                | 1.62 (1.51-1.73) *** | 1.75 (1.54-1.97) ***                         | 1.40 (1.22-1.58) *** |
| Painful conditions       | 1.62 (1.55-1.70) ***                                | 1.41 (1.34-1.48) *** | 1.40 (1.28-1.52) ***                         | 1.24 (1.13-1.35) **  |

§ : p>0.05 \* : p<0.05, \*\* : p<0.01, \*\*\* : p<0.001  
 Model 1: Adjusted for age, sex and socioeconomic status  
 Model 2: Adjusted for age, sex, socioeconomic status, smoking, alcohol frequency, body mass index and physical activity

21  
22  
23  
24  
25  
26  
27  
28  
29  
30  
31  
32  
33  
34  
35  
36

| Outcome                        | Self-report COPD compared with no COPD<br>N=502,640 |                      | GOLD COPD compared with no COPD<br>N=496,943 |                      |
|--------------------------------|-----------------------------------------------------|----------------------|----------------------------------------------|----------------------|
|                                | Model 1<br>N=502,013                                | Model 2<br>N=487,718 | Model 1<br>N=496,324                         | Model 2<br>N=482,378 |
|                                | OR (95% CI)                                         | OR (95% CI)          | OR (95% CI)                                  | OR (95% CI)          |
| Multimorbidity (≥4 conditions) | 3.49 (3.28-3.70) ***                                | 2.79 (2.61-2.98) *** | 2.34 (2.10-2.63) ***                         | 1.99 (1.75-2.25) *** |
| Polypharmacy (≥5 medications)  | 3.85 (3.68-4.03) ***                                | 3.30 (3.15-3.46) *** | 3.47 (3.20-3.75) ***                         | 3.20 (2.95-3.48) *** |
| Polypharmacy (≥10 medications) | 5.72 (5.36-6.10) ***                                | 4.42 (4.11-4.75) *** | 4.20 (3.72-4.73) ***                         | 3.56 (3.12-4.05) *** |

§ : p>0.05 \* : p<0.05, \*\* : p<0.01, \*\*\* : p<0.001  
 Model 1: Adjusted for age, sex and socioeconomic status  
 Model 2: Adjusted for age, sex, socioeconomic status, smoking, alcohol frequency, body mass index and physical activity

37  
38  
39  
40  
41  
42  
43  
44  
45  
46  
47  
48  
49  
50  
51  
52  
53  
54  
55  
56  
57  
58  
59  
60

| ADR               | Self-report COPD compared with no COPD<br>N=502,640 |                      | GOLD COPD compared with no COPD<br>N=496,943 |                      |
|-------------------|-----------------------------------------------------|----------------------|----------------------------------------------|----------------------|
|                   | Model 1<br>N=502,013                                | Model 2<br>N=487,718 | Model 1<br>N=496,943                         | Model 2<br>N=482,378 |
|                   | OR (95% CI)                                         | OR (95% CI)          | OR (95% CI)                                  | OR (95% CI)          |
| Falls             | 2.27 (2.13 – 2.42) ***                              | 1.83 (1.71-1.96) *** | 1.66 (1.47 – 1.87) ***                       | 1.49 (1.30-1.69) *** |
| Constipation      | 2.71 (2.54 – 2.89) ***                              | 2.66 (2.39-2.96) *** | 2.18 (1.77 – 2.64) ***                       | 1.82 (1.47-2.24) *** |
| Urinary retention | 3.38 (2.94 – 3.87) ***                              | 2.59 (2.22-3.0) ***  | 1.98 (1.44 – 2.64) ***                       | 1.64 (1.18-2.21) **  |
| CNS Depression    | 3.75 (3.31 – 4.25) ***                              | 2.81 (2.45-3.22) *** | 2.29 (1.73 – 2.95) ***                       | 1.87 (1.40-2.43) *** |
| Bleeding          | 4.60 (3.35 – 6.19) ***                              | 3.39 (2.40-4.66) *** | 2.63 (1.25 – 4.80) **                        | 1.76 (0.75-3.48) §   |
| Renal injury      | 2.22 (1.86 – 2.62) ***                              | 1.84 (1.53-2.19) *** | 1.94 (1.41 – 2.58) ***                       | 1.84 (1.33-2.49) *** |

§ : p>0.05 \* : p<0.05, \*\* : p<0.01, \*\*\* : p<0.001  
 Model 1: Adjusted for age, sex and socioeconomic status  
 Model 2: Adjusted for age, sex, socioeconomic status, smoking, alcohol frequency, body mass index and physical activity

Subgroup analyses – comparing COPD with no COPD among participants with specific categories of comorbidity

**Table S4. Odds ratios (with 95% CI) for taking 3 of more medications associated with similar ADRs in participants with cardiovascular disease (CVD)**

| ADR               | Self-report COPD plus CVD compared with CVD alone (no COPD)<br>N=156,848 | GOLD COPD plus CVD compared with CVD alone (no COPD)<br>N=154,047 |
|-------------------|--------------------------------------------------------------------------|-------------------------------------------------------------------|
|                   | Model 1<br>N=156,667                                                     | Model 1<br>N=153,852                                              |
|                   | OR (95% CI)                                                              | OR (95% CI)                                                       |
| Falls             | 1.92 (1.79-2.07) ***                                                     | 1.59 (1.39-1.82) ***                                              |
| Constipation      | 2.89 (2.58-3.23) ***                                                     | 2.06 (1.63-2.57) ***                                              |
| Urinary retention | 2.78 (2.33-3.28) ***                                                     | 1.92 (1.30-2.72) ***                                              |
| CNS Depression    | 3.17 (2.71-3.69) ***                                                     | 2.17 (1.54-2.97) ***                                              |
| Bleeding          | 4.00 (2.85-5.48) ***                                                     | 2.26 (0.96-4.44) *                                                |
| Renal injury      | 1.90 (1.59-2.25) ***                                                     | 1.82 (1.31-2.45) ***                                              |

§ : p>0.05 \* : p<0.05, \*\* : p<0.01, \*\*\* : p<0.001  
Model 1: Adjusted for age, sex and socioeconomic status

**Table S5. Odds ratios (with 95% CI) for taking 3 of more medications associated with similar ADRs in participants with cancer**

| ADR               | Self-report COPD plus cancer compared with cancer alone (no COPD)<br>N=38,623 | GOLD COPD plus cancer compared with cancer alone (no COPD)<br>N=37,958 |
|-------------------|-------------------------------------------------------------------------------|------------------------------------------------------------------------|
|                   | Model 1<br>N=38,575                                                           | Model 1<br>N= 37,912                                                   |
|                   | OR (95% CI)                                                                   | OR (95% CI)                                                            |
| Falls             | 2.35 (1.95-2.81) ***                                                          | 1.49 (1.00-2.13) *                                                     |
| Constipation      | 3.55 (2.73-4.56) ***                                                          | 2.21 (1.22-3.68) **                                                    |
| Urinary retention | 3.65 (2.52-5.13) ***                                                          | 1.99 (0.78-4.14) §                                                     |
| CNS Depression    | 3.74 (2.66-5.14) ***                                                          | 2.04 (0.86-4.04) §                                                     |
| Bleeding          | 4.69 (1.91-9.86) ***                                                          | 2.20 (0.12-10.23) §                                                    |
| Renal injury      | 2.0 (1.17-3.20) **                                                            | 2.26 (0.89-4.71) §                                                     |

§ : p>0.05 \* : p<0.05, \*\* : p<0.01, \*\*\* : p<0.001  
Model 1: Adjusted for age, sex and socioeconomic status

**Table S6. Odds ratios (with 95% CI) for taking 3 of more medications associated with similar ADRs in participants with gastrointestinal disease (GI)**

| ADR               | Self-report COPD plus GI compared with GI alone (no COPD)<br>N=58372 | GOLD COPD plus GI compared with GI alone (no COPD)<br>N=57103 |
|-------------------|----------------------------------------------------------------------|---------------------------------------------------------------|
|                   | Model 1<br>N=58,299                                                  | Model 1<br>N=57,031                                           |
|                   | OR (95% CI)                                                          | OR (95% CI)                                                   |
| Falls             | 2.18 (1.92-2.46) ***                                                 | 1.46 (1.13-1.87) **                                           |
| Constipation      | 2.70 (2.29-3.16) ***                                                 | 1.58 (1.08-2.24) *                                            |
| Urinary retention | 2.64 (2.12-3.26) ***                                                 | 1.46 (0.83-2.37) §                                            |
| CNS Depression    | 3.02 (2.47-3.66) ***                                                 | 1.50 (0.88-2.37) §                                            |
| Bleeding          | 3.88 (2.27-6.25) ***                                                 | 3.18 (0.97-7.63) §                                            |
| Renal injury      | 1.99 (1.37-2.80) ***                                                 | 1.22 (0.48-2.51) §                                            |

§ : p>0.05 \* : p<0.05, \*\* : p<0.01, \*\*\* : p<0.001  
Model 1: Adjusted for age, sex and socioeconomic status

1  
2  
3  
4  
5  
6  
7  
8  
9  
10  
11  
12  
13  
14  
15  
16  
17  
18  
19  
20  
21  
22  
23

| <b>Table S7. Odds ratios (with 95% CI) for taking 3 of more medications associated with similar ADRs in participants with mental health conditions (MH)</b> |                                                                       |                                                               |
|-------------------------------------------------------------------------------------------------------------------------------------------------------------|-----------------------------------------------------------------------|---------------------------------------------------------------|
| ADR                                                                                                                                                         | Self-report COPD plus MH compared with MH alone (no COPD)<br>N=36,949 | GOLD COPD plus MH compared with MH alone (no COPD)<br>N=36126 |
|                                                                                                                                                             | Model 1<br>N=36,885                                                   | Model 1<br>N=36,065                                           |
|                                                                                                                                                             | OR (95% CI)                                                           | OR (95% CI)                                                   |
| Falls                                                                                                                                                       | 2.21 (1.90-2.56) ***                                                  | 1.35 (0.99-1.82) §                                            |
| Constipation                                                                                                                                                | 2.33 (1.93-2.81) ***                                                  | 1.62 (1.08-2.34) *                                            |
| Urinary retention                                                                                                                                           | 2.17 (1.71-2.74) ***                                                  | 1.42 (0.82-2.29) §                                            |
| CNS Depression                                                                                                                                              | 2.53 (2.04-3.12) ***                                                  | 1.66 (1.03-2.54) *                                            |
| Bleeding                                                                                                                                                    | 2.86 (1.77-4.17) ***                                                  | 1.94 (0.76-4.05) §                                            |
| Renal injury                                                                                                                                                | 1.86 (1.19-2.79) **                                                   | 1.27 (0.45-2.80) §                                            |
| § : p>0.05 * : p<0.05, ** : p<0.01, *** : p<0.001<br>Model 1: Adjusted for age, sex and socioeconomic status                                                |                                                                       |                                                               |

24  
25  
26  
27  
28  
29  
30  
31  
32  
33  
34  
35  
36  
37  
38  
39  
40  
41  
42  
43  
44  
45  
46  
47  
48  
49  
50  
51  
52  
53  
54  
55  
56  
57  
58  
59  
60

| <b>Table S8. Odds ratios (with 95% CI) for taking 3 of more medications associated with similar ADRs in participants with painful conditions</b> |                                                                                                       |                                                                                                |
|--------------------------------------------------------------------------------------------------------------------------------------------------|-------------------------------------------------------------------------------------------------------|------------------------------------------------------------------------------------------------|
| ADR                                                                                                                                              | Self-report COPD plus painful conditions compared with painful conditions alone (no COPD)<br>N=83,992 | GOLD COPD plus painful conditions compared with painful conditions alone (no COPD)<br>N=82,388 |
|                                                                                                                                                  | Model 1<br>N=83,895                                                                                   | Model 1<br>N=82,294                                                                            |
|                                                                                                                                                  | OR (95% CI)                                                                                           | OR (95% CI)                                                                                    |
| Falls                                                                                                                                            | 1.99 (1.79-2.19) ***                                                                                  | 1.45 (1.19-1.75) ***                                                                           |
| Constipation                                                                                                                                     | 2.54 (2.21-2.91) ***                                                                                  | 1.50 (1.10-2.00) **                                                                            |
| Urinary retention                                                                                                                                | 2.46 (2.03-2.96) ***                                                                                  | 1.11 (0.64-1.75) §                                                                             |
| CNS Depression                                                                                                                                   | 2.71 (2.28-3.21) ***                                                                                  | 1.40 (0.90-2.06) §                                                                             |
| Bleeding                                                                                                                                         | 3.50 (2.37-5.01) ***                                                                                  | 2.20 (0.86-4.54) §                                                                             |
| Renal injury                                                                                                                                     | 1.66 (1.30-2.09) ***                                                                                  | 1.49 (0.93-2.25) §                                                                             |
| § : p>0.05 * : p<0.05, ** : p<0.01, *** : p<0.001<br>Model 1: Adjusted for age, sex and socioeconomic status                                     |                                                                                                       |                                                                                                |

| Appendix 4: Specific medications in UK Biobank participants with and without COPD |                                  |                                            |                            |                            |                                 |                               |
|-----------------------------------------------------------------------------------|----------------------------------|--------------------------------------------|----------------------------|----------------------------|---------------------------------|-------------------------------|
| Medications                                                                       | Control<br>n=494323<br>count (%) | Self-report<br>COPD<br>n=8317<br>count (%) | GOLD COPD                  |                            |                                 |                               |
|                                                                                   |                                  |                                            | All<br>n=2620<br>count (%) | Mild<br>n=399<br>count (%) | Moderate<br>n=1409<br>count (%) | Severe<br>n= 812<br>count (%) |
| <b>Total number of medications</b>                                                |                                  |                                            |                            |                            |                                 |                               |
| ≥1                                                                                | 356406 (72.1)                    | 7670 (92.2)                                | 2452 (93.6)                | 352 (88.2)                 | 1321 (93.8)                     | 779 (95.9)                    |
| ≥5                                                                                | 87286 (17.7)                     | 4312 (51.8)                                | 1349 (51.5)                | 171 (42.9)                 | 702 (49.8)                      | 476 (58.6)                    |
| ≥10                                                                               | 10678 (2.2)                      | 1269 (15.3)                                | 329 (12.6)                 | 31 (7.8)                   | 172 (12.2)                      | 126 (15.5)                    |
| <b>Respiratory</b>                                                                |                                  |                                            |                            |                            |                                 |                               |
| Short acting B <sub>2</sub> agon.                                                 | 22615 (4.6)                      | 3328 (40.0)                                | 1245 (47.5)                | 123 (30.8)                 | 614 (43.6)                      | 508 (62.6)                    |
| LABA                                                                              | 9819 (2.0)                       | 2357 (28.3)                                | 905 (34.5)                 | 93 (23.3)                  | 411 (29.2)                      | 401 (49.3)                    |
| LAMA                                                                              | 597 (0.1)                        | 1345 (16.2)                                | 581 (22.2)                 | 33 (8.3)                   | 265 (18.8)                      | 283 (34.9)                    |
| ICS                                                                               | 15309 (3.1)                      | 2638 (31.7)                                | 962 (36.7)                 | 98 (24.6)                  | 471 (33.4)                      | 393 (48.4)                    |
| LABA+ICS                                                                          | 7259 (1.5)                       | 1842 (22.1)                                | 699 (26.7)                 | 67 (16.8)                  | 313 (22.2)                      | 319 (39.3)                    |
| Prednisolone                                                                      | 3127 (0.6)                       | 280 (3.4)                                  | 82 (3.1)                   | 12 (3.0)                   | 27 (1.9)                        | 43 (5.3)                      |
| Mucolytic                                                                         | 174 (0.04)                       | 187 (2.2)                                  | 49 (1.9)                   | 1 (0.3)                    | 10 (0.7)                        | 38 (4.7)                      |
| <b>Cardiovascular</b>                                                             |                                  |                                            |                            |                            |                                 |                               |
| Antiplatelet                                                                      | 21817 (4.4)                      | 894 (10.7)                                 | 268 (10.2)                 | 31 (7.8)                   | 158 (11.2)                      | 79 (9.7)                      |
| ACE-inhibitor                                                                     | 44991 (9.1)                      | 1276 (15.3)                                | 367 (14.0)                 | 33 (8.3)                   | 198 (14.1)                      | 136 (16.7)                    |
| ARB                                                                               | 17911 (3.6)                      | 565 (6.8)                                  | 159 (6.1)                  | 17 (4.3)                   | 83 (5.9)                        | 59 (7.2)                      |
| Calcium CB                                                                        | 14317 (2.9)                      | 627 (7.5)                                  | 196 (7.5)                  | 23 (5.8)                   | 106 (7.5)                       | 67 (8.3)                      |
| Statin                                                                            | 73439 (14.9)                     | 2278 (27.4)                                | 707 (27.0)                 | 72 (18.0)                  | 395 (28.0)                      | 240 (29.6)                    |
| GTN                                                                               | 4425 (0.9)                       | 373 (4.5)                                  | 110 (4.2)                  | 8 (2.0)                    | 70 (5.0)                        | 32 (3.9)                      |
| ISMN                                                                              | 2814 (0.6)                       | 244 (2.9)                                  | 68 (2.6)                   | 5 (1.3)                    | 42 (3.0)                        | 21 (2.6)                      |
| Loop diuretic                                                                     | 4836 (1.0)                       | 415 (5.0)                                  | 107 (4.1)                  | 10 (2.5)                   | 51 (3.6)                        | 46 (5.7)                      |
| Thiazide                                                                          | 21961 (4.4)                      | 637 (7.7)                                  | 196 (7.5)                  | 22 (5.5)                   | 108 (7.7)                       | 66 (8.1)                      |
| Warfarin                                                                          | 4934 (1.0)                       | 238 (2.9)                                  | 67 (2.6)                   | 6 (1.5)                    | 33 (2.3)                        | 28 (3.4)                      |
| <b>Diabetes</b>                                                                   |                                  |                                            |                            |                            |                                 |                               |
| Insulin                                                                           | 4643 (0.9)                       | 161 (1.9)                                  | 35 (1.3)                   | 2 (0.5)                    | 23 (1.6)                        | 3 (0.4)                       |
| Metformin                                                                         | 13754 (2.8)                      | 448 (5.4)                                  | 102 (3.9)                  | 7 (1.8)                    | 57 (4.0)                        | 38 (4.7)                      |
| Sulphonylurea                                                                     | 4901 (1.0)                       | 158 (1.9)                                  | 35 (1.3)                   | 2 (0.5)                    | 17 (1.2)                        | 16 (2.0)                      |
| Thiazolidindione                                                                  | 2212 (0.4)                       | 60 (0.7)                                   | 17 (0.6)                   | 1 (0.3)                    | 10 (0.7)                        | 6 (0.7)                       |
| <b>Gastrointestinal</b>                                                           |                                  |                                            |                            |                            |                                 |                               |
| PPI                                                                               | 42012 (8.5)                      | 1989 (23.9)                                | 522 (19.9)                 | 79 (19.8)                  | 286 (20.3)                      | 157 (19.3)                    |
| Antacid                                                                           | 2435 (0.5)                       | 146 (1.8)                                  | 25 (1.0)                   | 7 (1.8)                    | 10 (0.7)                        | 8 (1.0)                       |
| H <sub>2</sub> RA.                                                                | 7772 (1.6)                       | 325 (3.9)                                  | 89 (3.4)                   | 15 (3.8)                   | 53 (3.8)                        | 21 (2.6)                      |
| Laxative                                                                          | 5787 (1.8)                       | 317 (3.8)                                  | 81 (3.1)                   | 11 (2.8)                   | 40 (2.8)                        | 30 (3.7)                      |
| <b>Pain</b>                                                                       |                                  |                                            |                            |                            |                                 |                               |
| Paracetamol                                                                       | 82376 (16.7)                     | 2752 (33.1)                                | 790 (30.2)                 | 111 (27.8)                 | 446 (31.6)                      | 233 (28.7)                    |
| NSAID                                                                             | 45909 (9.3)                      | 1149 (13.8)                                | 319 (12.2)                 | 50 (12.5)                  | 175 (12.4)                      | 94 (11.6)                     |
| Weak opiate                                                                       | 18736 (3.8)                      | 1209 (14.5)                                | 336 (12.8)                 | 48 (12.0)                  | 191 (13.6)                      | 97 (11.9)                     |
| Strong opiate                                                                     | 1071 (0.2)                       | 106 (1.8)                                  | 32 (1.2)                   | 5 (1.3)                    | 16 (1.1)                        | 11 (1.4)                      |
| <b>Mental health</b>                                                              |                                  |                                            |                            |                            |                                 |                               |
| SSRI+related                                                                      | 15394 (3.1)                      | 747 (9.0)                                  | 175 (6.7)                  | 31 (7.8)                   | 100 (7.1)                       | 44 (5.4)                      |
| Tricyclic                                                                         | 4229 (0.9)                       | 206 (2.5)                                  | 49 (1.9)                   | 11 (2.8)                   | 25 (1.8)                        | 13 (1.6)                      |
| Antipsychotic                                                                     | 2237 (0.5)                       | 107 (1.3)                                  | 30 (1.1)                   | 5 (1.3)                    | 16 (1.1)                        | 9 (1.1)                       |
| Benzodiazepine                                                                    | 2316 (0.5)                       | 182 (2.2)                                  | 47 (1.8)                   | 6 (1.5)                    | 28 (2.0)                        | 13 (1.6)                      |
| <b>Metabolic</b>                                                                  |                                  |                                            |                            |                            |                                 |                               |
| Thyroxine                                                                         | 20980 (4.2)                      | 560 (6.7)                                  | 150 (5.7)                  | 27 (6.8)                   | 92 (6.5)                        | 31 (3.8)                      |
| Bisphosphonate                                                                    | 3655 (0.7)                       | 189 (2.3)                                  | 66 (2.5)                   | 15 (3.8)                   | 32 (2.3)                        | 19 (2.3)                      |

**STROBE 2007 (v4) Statement—Checklist of items that should be included in reports of *cross-sectional studies***

| Section/Topic                | Item # | Recommendation                                                                                                                                                                       | Reported on page # |
|------------------------------|--------|--------------------------------------------------------------------------------------------------------------------------------------------------------------------------------------|--------------------|
| Title and abstract           | 1      | (a) Indicate the study's design with a commonly used term in the title or the abstract                                                                                               | 2                  |
|                              |        | (b) Provide in the abstract an informative and balanced summary of what was done and what was found                                                                                  | 2,3                |
| <b>Introduction</b>          |        |                                                                                                                                                                                      |                    |
| Background/rationale         | 2      | Explain the scientific background and rationale for the investigation being reported                                                                                                 | 4                  |
| Objectives                   | 3      | State specific objectives, including any prespecified hypotheses                                                                                                                     | 5                  |
| <b>Methods</b>               |        |                                                                                                                                                                                      |                    |
| Study design                 | 4      | Present key elements of study design early in the paper                                                                                                                              | 5,6,9              |
| Setting                      | 5      | Describe the setting, locations, and relevant dates, including periods of recruitment, exposure, follow-up, and data collection                                                      | 6,7                |
| Participants                 | 6      | (a) Give the eligibility criteria, and the sources and methods of selection of participants                                                                                          | 7                  |
| Variables                    | 7      | Clearly define all outcomes, exposures, predictors, potential confounders, and effect modifiers. Give diagnostic criteria, if applicable                                             | 6-8                |
| Data sources/<br>measurement | 8*     | For each variable of interest, give sources of data and details of methods of assessment (measurement). Describe comparability of assessment methods if there is more than one group | 6-8                |
| Bias                         | 9      | Describe any efforts to address potential sources of bias                                                                                                                            | 14,15              |
| Study size                   | 10     | Explain how the study size was arrived at                                                                                                                                            | 7                  |
| Quantitative variables       | 11     | Explain how quantitative variables were handled in the analyses. If applicable, describe which groupings were chosen and why                                                         | 6,7,8,9            |
| Statistical methods          | 12     | (a) Describe all statistical methods, including those used to control for confounding                                                                                                | 8-10               |
|                              |        | (b) Describe any methods used to examine subgroups and interactions                                                                                                                  | 9,10               |
|                              |        | (c) Explain how missing data were addressed                                                                                                                                          | 10                 |
|                              |        | (d) If applicable, describe analytical methods taking account of sampling strategy                                                                                                   | n/a                |
|                              |        | (e) Describe any sensitivity analyses                                                                                                                                                | 9,10               |
| <b>Results</b>               |        |                                                                                                                                                                                      |                    |

|                          |     |                                                                                                                                                                                                              |                             |
|--------------------------|-----|--------------------------------------------------------------------------------------------------------------------------------------------------------------------------------------------------------------|-----------------------------|
| Participants             | 13* | (a) Report numbers of individuals at each stage of study—eg numbers potentially eligible, examined for eligibility, confirmed eligible, included in the study, completing follow-up, and analysed            | 11, figure 1                |
|                          |     | (b) Give reasons for non-participation at each stage                                                                                                                                                         | 11, Figure 1                |
|                          |     | (c) Consider use of a flow diagram                                                                                                                                                                           | Figure 1                    |
| Descriptive data         | 14* | (a) Give characteristics of study participants (eg demographic, clinical, social) and information on exposures and potential confounders                                                                     | Table 1                     |
|                          |     | (b) Indicate number of participants with missing data for each variable of interest                                                                                                                          | Table 1                     |
| Outcome data             | 15* | Report numbers of outcome events or summary measures                                                                                                                                                         | 11-13, figure 2, appendix 3 |
| Main results             | 16  | (a) Give unadjusted estimates and, if applicable, confounder-adjusted estimates and their precision (eg, 95% confidence interval). Make clear which confounders were adjusted for and why they were included | 11-13, figure 2, appendix 3 |
|                          |     | (b) Report category boundaries when continuous variables were categorized                                                                                                                                    | 12,13                       |
|                          |     | (c) If relevant, consider translating estimates of relative risk into absolute risk for a meaningful time period                                                                                             | n/a                         |
| Other analyses           | 17  | Report other analyses done—eg analyses of subgroups and interactions, and sensitivity analyses                                                                                                               | 12,13, Appendix 3,          |
| <b>Discussion</b>        |     |                                                                                                                                                                                                              |                             |
| Key results              | 18  | Summarise key results with reference to study objectives                                                                                                                                                     | 14                          |
| Limitations              | 19  | Discuss limitations of the study, taking into account sources of potential bias or imprecision. Discuss both direction and magnitude of any potential bias                                                   | 14,15                       |
| Interpretation           | 20  | Give a cautious overall interpretation of results considering objectives, limitations, multiplicity of analyses, results from similar studies, and other relevant evidence                                   | 15,16                       |
| Generalisability         | 21  | Discuss the generalisability (external validity) of the study results                                                                                                                                        | 15,16,17                    |
| <b>Other information</b> |     |                                                                                                                                                                                                              |                             |
| Funding                  | 22  | Give the source of funding and the role of the funders for the present study and, if applicable, for the original study on which the present article is based                                                | 17,18                       |

\*Give information separately for cases and controls in case-control studies and, if applicable, for exposed and unexposed groups in cohort and cross-sectional studies.

**Note:** An Explanation and Elaboration article discusses each checklist item and gives methodological background and published examples of transparent reporting. The STROBE checklist is best used in conjunction with this article (freely available on the Web sites of PLoS Medicine at <http://www.plosmedicine.org/>, Annals of Internal Medicine at <http://www.annals.org/>, and Epidemiology at <http://www.epidem.com/>). Information on the STROBE Initiative is available at [www.strobe-statement.org](http://www.strobe-statement.org).
