# Supplementary material for: Examining patterns of multimorbidity, polypharmacy and risk of adverse drug reactions in chronic obstructive pulmonary disease: a cross-sectional UK Biobank study
Source: PubMed Central journal article supplement (PMC5781016; doi:10.1136/bmjopen-2017-018404), 2018-01-14
Supplement: bmjopen-2017-018404supp001.pdf [file bmjopen-2017-018404supp001.pdf]

| <b>Comorbidity category (used in analysis)</b> | <b>Conditions included (as reported in table 2)</b> | <b>Self-reported conditions comprising this condition (UK Biobank variables used to identify self-reported conditions)</b>                                                                                       |
|------------------------------------------------|-----------------------------------------------------|------------------------------------------------------------------------------------------------------------------------------------------------------------------------------------------------------------------|
| Cardiovascular conditions                      | Hypertension                                        | Hypertension<br>Essential hypertension                                                                                                                                                                           |
|                                                | Coronary heart disease                              | Heart attack/MI<br>Angina                                                                                                                                                                                        |
|                                                | Diabetes                                            | Diabetic nephropathy<br>Diabetic neuropathy/ulcers<br>Diabetes<br>Type 1 diabetes<br>Type 2 diabetes<br>Diabetic eye disease                                                                                     |
|                                                | Stroke/TIA                                          | Stroke<br>TIA<br>Subarachnoid haemorrhage<br>Brain haemorrhage<br>Ischaemic stroke                                                                                                                               |
|                                                | Atrial fibrillation                                 | Atrial fibrillation                                                                                                                                                                                              |
|                                                | Heart failure                                       | Cardiomyopathy<br>Hypertrophic cardiomyopathy<br>Heart failure/pulmonary oedema                                                                                                                                  |
|                                                | Peripheral vascular disease                         | Peripheral vascular disease<br>Leg claudication/intermittent claudication                                                                                                                                        |
| Respiratory                                    | COPD                                                | COPD/Chronic obstructive pulmonary disease<br>Emphysema/Chronic bronchitis<br>Emphysema                                                                                                                          |
|                                                | Asthma                                              | Asthma                                                                                                                                                                                                           |
|                                                | PE/DVT                                              | Deep vein thrombosis<br>Pulmonary embolism                                                                                                                                                                       |
|                                                | Bronchiectasis                                      | Bronchiectasis                                                                                                                                                                                                   |
|                                                | Pulmonary fibrosis                                  | Pulmonary fibrosis                                                                                                                                                                                               |
| Cancer                                         | Cancer                                              | "yes"/"no" to "have you ever had cancer?"                                                                                                                                                                        |
| Gastrointestinal                               | Dyspepsia                                           | Gastro-oesophageal reflux (GORD)<br>Oesophagitis/Barrett's oesophagus<br>Gastric stomach ulcers<br>Gastric erosions/gastritis<br>Duodenal ulcer<br>Dyspepsia/indigestion<br>Hiatus hernia<br>Helicobacter pylori |
|                                                | Diverticular disease                                | Diverticular disease/diverticulitis                                                                                                                                                                              |

|                    |                            |                                                                                                                                                                                                                                                                                                 |
|--------------------|----------------------------|-------------------------------------------------------------------------------------------------------------------------------------------------------------------------------------------------------------------------------------------------------------------------------------------------|
|                    | Irritable bowel syndrome   | Irritable bowel syndrome                                                                                                                                                                                                                                                                        |
|                    | Chronic liver disease      | Oesophageal varices<br>Non infective hepatitis<br>Liver failure/cirrhosis<br>Primary biliary cirrhosis                                                                                                                                                                                          |
|                    | Inflammatory bowel disease | Inflammatory bowel disease<br>Crohn's disease<br>Ulcerative colitis                                                                                                                                                                                                                             |
|                    | Constipation               | Constipation                                                                                                                                                                                                                                                                                    |
|                    | Viral hepatitis            | Hepatitis B<br>Hepatitis C<br>Hepatitis D                                                                                                                                                                                                                                                       |
| Mental Health      | Depression                 | Depression<br>Postnatal depression                                                                                                                                                                                                                                                              |
|                    | Anxiety                    | Anxiety/panic attacks<br>Nervous breakdown<br>Post-traumatic stress disorder<br>Obsessive compulsive disorder<br>Stress<br>Insomnia<br>Psychological/psychiatric problem                                                                                                                        |
|                    | Schizophrenia              | Scizophrenia                                                                                                                                                                                                                                                                                    |
|                    | Bipolar                    | Mania<br>Bipolar disorder<br>Manic depression                                                                                                                                                                                                                                                   |
| Painful conditions | Connective tissue diseases | Myositis/myopathy<br>Systemic lupus erythematosus/SLE<br>Connective tissue disorder<br>Sjogren's syndrome.sicca syndrome<br>Dermatopolymyositis<br>Scleroderma/systemic sclerosis<br>Rheumatoid arthritis<br>Psoriatic arthropathy<br>Dermatomyositis<br>Polymyositis<br>Polymyalgia rheumatica |
|                    | Other painful conditions   | Back pain<br>Joint pain<br>Headaches (not migraine)<br>Sciatica<br>Plantar fasciitis<br>Carpal tunnel syndrome<br>Fibromyalgia<br>Arthritis<br>Shingles<br>Disc problem<br>Prolapsed disc/slipped disc                                                                                          |

|       |              |                                                                                                                                                                                                           |
|-------|--------------|-----------------------------------------------------------------------------------------------------------------------------------------------------------------------------------------------------------|
|       |              | Spine arthritis/spondylitis<br>Ankylosing spondylitis<br>Back problem<br>Osteoarthritis<br>Gout<br>Cervical spondylosis<br>Trigeminal neuralgia<br>Disc degeneration<br>Trapped nerve/compressed<br>nerve |
| Other | Osteoporosis | Osteoporosis                                                                                                                                                                                              |
