# Supplementary material for: Examining patterns of multimorbidity, polypharmacy and risk of adverse drug reactions in chronic obstructive pulmonary disease: a cross-sectional UK Biobank study
Source: PubMed Central journal article supplement (PMC5781016; doi:10.1136/bmjopen-2017-018404), 2018-01-14
Supplement: bmjopen-2017-018404supp002.pdf [file bmjopen-2017-018404supp002.pdf]

| Drugs with cumulative risk of Adverse Drug Reactions* |                                                                                                                                                                                                                                                                                                                                                                                                                                                                                                                                                                                                                                                                                                                                                        |
|-------------------------------------------------------|--------------------------------------------------------------------------------------------------------------------------------------------------------------------------------------------------------------------------------------------------------------------------------------------------------------------------------------------------------------------------------------------------------------------------------------------------------------------------------------------------------------------------------------------------------------------------------------------------------------------------------------------------------------------------------------------------------------------------------------------------------|
| Adverse Drug Reaction                                 | Contributing drug classes (participants taking 3 or more considered 'at risk' for the purposes of analysis)                                                                                                                                                                                                                                                                                                                                                                                                                                                                                                                                                                                                                                            |
| Falls                                                 | <ul style="list-style-type: none"> <li>H2-receptor blockers</li> <li>Loperamide</li> <li>Prochlorperazine</li> <li>Metoclopramide</li> <li>ACE-inhibitor/Angiotensin receptor blocker</li> <li>Thiazide diuretic</li> <li>Loop diuretic</li> <li>Amiloride/triamterene</li> <li>Spironolactone</li> <li>Beta-blocker</li> <li>Calcium-channel blocker</li> <li>Nitrates or nicorandil</li> <li>Digoxin</li> <li>Oral steroids</li> <li>Opiates</li> <li>Benzodiazepines</li> <li>Sedative antihistamines</li> <li>H1-receptor blockers</li> <li>Antipsychotics</li> <li>Tricyclic antidepressants</li> <li>Sulfonylureas/gliptins/glinides</li> <li>Pioglitazone</li> <li>Urinary antispasmodics</li> <li>Dosulepin</li> <li>Alpha-blockers</li> </ul> |
| Constipation                                          | <ul style="list-style-type: none"> <li>H2-receptor blockers</li> <li>Laxatives</li> <li>Loperamide</li> <li>Prochlorperazine</li> <li>Thiazide diuretics</li> <li>Loop diuretics</li> <li>Calcium-channel blockers</li> <li>Opiates</li> <li>Sedative antihistamines</li> <li>H1-receptor blockers</li> <li>Antipsychotics</li> <li>Tricyclic antidepressants</li> <li>Urinary antispasmodics</li> <li>Dosulepin</li> </ul>                                                                                                                                                                                                                                                                                                                            |
| Urinary retention                                     | <ul style="list-style-type: none"> <li>H2-receptor blockers</li> <li>Loperamide</li> <li>Prochlorperazine</li> <li>Opiates</li> <li>Sedative antihistamines</li> <li>H1-receptor blockers</li> <li>Antipsychotics</li> <li>Tricyclic antidepressants</li> </ul>                                                                                                                                                                                                                                                                                                                                                                                                                                                                                        |

|                                                                                                                                                                   |                                                                                                                                                                                                                                                |
|-------------------------------------------------------------------------------------------------------------------------------------------------------------------|------------------------------------------------------------------------------------------------------------------------------------------------------------------------------------------------------------------------------------------------|
|                                                                                                                                                                   | Urinary antispasmodics<br>Dosulepin                                                                                                                                                                                                            |
| CNS depression                                                                                                                                                    | H2-receptor blockers<br>Loperamide<br>Prochlorperazine<br>Oral steroids<br>Opiates<br>Benzodiazepines<br>Sedative antihistamines<br>H1-receptor blockers<br>Antipsychotics<br>Tricyclic antidepressants<br>Urinary antispasmodics<br>Dosulepin |
| Bleeding                                                                                                                                                          | Aspirin<br>Clopidogrel<br>Other antiplatelets<br>Oral steroids<br>SSRIs and related drugs<br>Non-steroidal anti-inflammatory drugs<br>Warfarin                                                                                                 |
| Renal injury                                                                                                                                                      | ACE-inhibitor/angiotensin receptor blockers<br>Thiazide diuretic<br>Loop diuretic<br>Amiloride/triamterene<br>Spironolactone<br>Antibiotics/antifungals<br>Non-steroidal anti-inflammatory drugs                                               |
| Adapted from <i>Scottish Government Model of Care Polypharmacy Working Group. Polypharmacy Guidance (2<sup>nd</sup> edition) March 2015. Scottish Government.</i> |                                                                                                                                                                                                                                                |
