# Supplementary material for: Examining patterns of multimorbidity, polypharmacy and risk of adverse drug reactions in chronic obstructive pulmonary disease: a cross-sectional UK Biobank study
Source: PubMed Central journal article supplement (PMC5781016; doi:10.1136/bmjopen-2017-018404), 2018-01-14
Supplement: bmjopen-2017-018404supp003.pdf [file bmjopen-2017-018404supp003.pdf]

| <b>Table S1. Odds ratios (with 95% CI) for the presence of categories of comorbidity</b> |                                                     |                      |                                              |                      |
|------------------------------------------------------------------------------------------|-----------------------------------------------------|----------------------|----------------------------------------------|----------------------|
| Comorbidity category                                                                     | Self-report COPD compared with no COPD<br>N=502,640 |                      | GOLD COPD compared with no COPD<br>N=496,943 |                      |
|                                                                                          | Model 1<br>N=502,013                                | Model 2<br>N=487,718 | Model 1<br>N=496,324                         | Model 2<br>N=482,378 |
|                                                                                          | OR (95% CI)                                         | OR (95% CI)          | OR (95% CI)                                  | OR (95% CI)          |
| Cardiovascular disease                                                                   | 1.45 (1.39-1.52) ***                                | 1.28 (1.22-1.34) *** | 1.11 (1.02-1.20) *                           | 1.08 (0.99-1.18) §   |
| Cancer                                                                                   | 1.29 (1.20-1.39) ***                                | 1.22 (1.13-1.31) *** | 1.12 (0.99-1.27) §                           | 1.06 (0.92-1.19) §   |
| Gastrointestinal disease                                                                 | 1.76 (1.67-1.86) ***                                | 1.56 (1.48-1.65) *** | 1.4 (1.26-1.54) ***                          | 1.24 (1.12-1.38) *** |
| Mental health                                                                            | 2.02 (1.89-2.15) ***                                | 1.62 (1.51-1.73) *** | 1.75 (1.54-1.97) ***                         | 1.40 (1.22-1.58) *** |
| Painful conditions                                                                       | 1.62 (1.55-1.70) ***                                | 1.41 (1.34-1.48) *** | 1.40 (1.28-1.52) ***                         | 1.24 (1.13-1.35) **  |

§ : p>0.05 \* : p<0.05, \*\* : p<0.01, \*\*\* : p<0.001  
Model 1: Adjusted for age, sex and socioeconomic status  
Model 2: Adjusted for age, sex, socioeconomic status, smoking, alcohol frequency, body mass index and physical activity

| <b>Table S2. Odds ratios (with 95% CI) for the presence of multimorbidity or polypharmacy</b> |                                                     |                      |                                              |                      |
|-----------------------------------------------------------------------------------------------|-----------------------------------------------------|----------------------|----------------------------------------------|----------------------|
| Outcome                                                                                       | Self-report COPD compared with no COPD<br>N=502,640 |                      | GOLD COPD compared with no COPD<br>N=496,943 |                      |
|                                                                                               | Model 1<br>N=502,013                                | Model 2<br>N=487,718 | Model 1<br>N=496,324                         | Model 2<br>N=482,378 |
|                                                                                               | OR (95% CI)                                         | OR (95% CI)          | OR (95% CI)                                  | OR (95% CI)          |
| Multimorbidity (≥4 conditions)                                                                | 3.49 (3.28-3.70) ***                                | 2.79 (2.61-2.98) *** | 2.34 (2.10-2.63) ***                         | 1.99 (1.75-2.25) *** |
| Polypharmacy (≥5 medications)                                                                 | 3.85 (3.68-4.03) ***                                | 3.30 (3.15-3.46) *** | 3.47 (3.20-3.75) ***                         | 3.20 (2.95-3.48) *** |
| Polypharmacy (≥10 medications)                                                                | 5.72 (5.36-6.10) ***                                | 4.42 (4.11-4.75) *** | 4.20 (3.72-4.73) ***                         | 3.56 (3.12-4.05) *** |

§ : p>0.05 \* : p<0.05, \*\* : p<0.01, \*\*\* : p<0.001  
Model 1: Adjusted for age, sex and socioeconomic status  
Model 2: Adjusted for age, sex, socioeconomic status, smoking, alcohol frequency, body mass index and physical activity

| <b>Table S3. Odds ratios (with 95% CI) for taking 3 of more medications associated with similar ADRs</b> |                                                     |                      |                                              |                      |
|----------------------------------------------------------------------------------------------------------|-----------------------------------------------------|----------------------|----------------------------------------------|----------------------|
| ADR                                                                                                      | Self-report COPD compared with no COPD<br>N=502,640 |                      | GOLD COPD compared with no COPD<br>N=496,943 |                      |
|                                                                                                          | Model 1<br>N=502,013                                | Model 2<br>N=487,718 | Model 1<br>N=496,943                         | Model 2<br>N=482,378 |
|                                                                                                          | OR (95% CI)                                         | OR (95% CI)          | OR (95% CI)                                  | OR (95% CI)          |
| Falls                                                                                                    | 2.27 (2.13 – 2.42) ***                              | 1.83 (1.71-1.96) *** | 1.66 (1.47 – 1.87) ***                       | 1.49 (1.30-1.69) *** |
| Constipation                                                                                             | 2.71 (2.54 – 2.89) ***                              | 2.66 (2.39-2.96) *** | 2.18 (1.77 – 2.64) ***                       | 1.82 (1.47-2.24) *** |
| Urinary retention                                                                                        | 3.38 (2.94 – 3.87) ***                              | 2.59 (2.22-3.0) ***  | 1.98 (1.44 – 2.64) ***                       | 1.64 (1.18-2.21) **  |
| CNS Depression                                                                                           | 3.75 (3.31 – 4.25) ***                              | 2.81 (2.45-3.22) *** | 2.29 (1.73 – 2.95) ***                       | 1.87 (1.40-2.43) *** |
| Bleeding                                                                                                 | 4.60 (3.35 – 6.19) ***                              | 3.39 (2.40-4.66) *** | 2.63 (1.25 – 4.80) **                        | 1.76 (0.75-3.48) §   |
| Renal injury                                                                                             | 2.22 (1.86 – 2.62) ***                              | 1.84 (1.53-2.19) *** | 1.94 (1.41 – 2.58) ***                       | 1.84 (1.33-2.49) *** |

§ : p>0.05 \* : p<0.05, \*\* : p<0.01, \*\*\* : p<0.001  
Model 1: Adjusted for age, sex and socioeconomic status  
Model 2: Adjusted for age, sex, socioeconomic status, smoking, alcohol frequency, body mass index and physical activity

Subgroup analyses – comparing COPD with no COPD among participants with specific categories of comorbidity

| <b>Table S4. Odds ratios (with 95% CI) for taking 3 of more medications associated with similar ADRs in participants with cardiovascular disease (CVD)</b> |                                                                          |                                                                   |
|------------------------------------------------------------------------------------------------------------------------------------------------------------|--------------------------------------------------------------------------|-------------------------------------------------------------------|
| ADR                                                                                                                                                        | Self-report COPD plus CVD compared with CVD alone (no COPD)<br>N=156,848 | GOLD COPD plus CVD compared with CVD alone (no COPD)<br>N=154,047 |
|                                                                                                                                                            | Model 1<br>N=156,667                                                     | Model 1<br>N=153,852                                              |
|                                                                                                                                                            | OR (95% CI)                                                              | OR (95% CI)                                                       |
| Falls                                                                                                                                                      | 1.92 (1.79-2.07) ***                                                     | 1.59 (1.39-1.82) ***                                              |
| Constipation                                                                                                                                               | 2.89 (2.58-3.23) ***                                                     | 2.06 (1.63-2.57) ***                                              |
| Urinary retention                                                                                                                                          | 2.78 (2.33-3.28) ***                                                     | 1.92 (1.30-2.72) ***                                              |
| CNS Depression                                                                                                                                             | 3.17 (2.71-3.69) ***                                                     | 2.17 (1.54-2.97) ***                                              |
| Bleeding                                                                                                                                                   | 4.00 (2.85-5.48) ***                                                     | 2.26 (0.96-4.44) *                                                |
| Renal injury                                                                                                                                               | 1.90 (1.59-2.25) ***                                                     | 1.82 (1.31-2.45) ***                                              |
| § : p>0.05 * : p<0.05, ** : p<0.01, *** : p<0.001<br>Model 1: Adjusted for age, sex and socioeconomic status                                               |                                                                          |                                                                   |

| <b>Table S5. Odds ratios (with 95% CI) for taking 3 of more medications associated with similar ADRs in participants with cancer</b> |                                                                               |                                                                        |
|--------------------------------------------------------------------------------------------------------------------------------------|-------------------------------------------------------------------------------|------------------------------------------------------------------------|
| ADR                                                                                                                                  | Self-report COPD plus cancer compared with cancer alone (no COPD)<br>N=38,623 | GOLD COPD plus cancer compared with cancer alone (no COPD)<br>N=37,958 |
|                                                                                                                                      | Model 1<br>N=38,575                                                           | Model 1<br>N= 37,912                                                   |
|                                                                                                                                      | OR (95% CI)                                                                   | OR (95% CI)                                                            |
| Falls                                                                                                                                | 2.35 (1.95-2.81) ***                                                          | 1.49 (1.00-2.13) *                                                     |
| Constipation                                                                                                                         | 3.55 (2.73-4.56) ***                                                          | 2.21 (1.22-3.68) **                                                    |
| Urinary retention                                                                                                                    | 3.65 (2.52-5.13) ***                                                          | 1.99 (0.78-4.14) §                                                     |
| CNS Depression                                                                                                                       | 3.74 (2.66-5.14) ***                                                          | 2.04 (0.86-4.04) §                                                     |
| Bleeding                                                                                                                             | 4.69 (1.91-9.86) ***                                                          | 2.20 (0.12-10.23) §                                                    |
| Renal injury                                                                                                                         | 2.0 (1.17-3.20) **                                                            | 2.26 (0.89-4.71) §                                                     |
| § : p>0.05 * : p<0.05, ** : p<0.01, *** : p<0.001<br>Model 1: Adjusted for age, sex and socioeconomic status                         |                                                                               |                                                                        |

| <b>Table S6. Odds ratios (with 95% CI) for taking 3 of more medications associated with similar ADRs in participants with gastrointestinal disease (GI)</b> |                                                                      |                                                               |
|-------------------------------------------------------------------------------------------------------------------------------------------------------------|----------------------------------------------------------------------|---------------------------------------------------------------|
| ADR                                                                                                                                                         | Self-report COPD plus GI compared with GI alone (no COPD)<br>N=58372 | GOLD COPD plus GI compared with GI alone (no COPD)<br>N=57103 |
|                                                                                                                                                             | Model 1<br>N=58,299                                                  | Model 1<br>N=57,031                                           |
|                                                                                                                                                             | OR (95% CI)                                                          | OR (95% CI)                                                   |
| Falls                                                                                                                                                       | 2.18 (1.92-2.46) ***                                                 | 1.46 (1.13-1.87) **                                           |
| Constipation                                                                                                                                                | 2.70 (2.29-3.16) ***                                                 | 1.58 (1.08-2.24) *                                            |
| Urinary retention                                                                                                                                           | 2.64 (2.12-3.26) ***                                                 | 1.46 (0.83-2.37) §                                            |
| CNS Depression                                                                                                                                              | 3.02 (2.47-3.66) ***                                                 | 1.50 (0.88-2.37) §                                            |
| Bleeding                                                                                                                                                    | 3.88 (2.27-6.25) ***                                                 | 3.18 (0.97-7.63) §                                            |
| Renal injury                                                                                                                                                | 1.99 (1.37-2.80) ***                                                 | 1.22 (0.48-2.51) §                                            |
| § : p>0.05 * : p<0.05, ** : p<0.01, *** : p<0.001<br>Model 1: Adjusted for age, sex and socioeconomic status                                                |                                                                      |                                                               |

**Table S7. Odds ratios (with 95% CI) for taking 3 of more medications associated with similar ADRs in participants with mental health conditions (MH)**

| ADR                                                                                                          | Self-report COPD plus MH compared with MH alone (no COPD)<br>N=36,949 | GOLD COPD plus MH compared with MH alone (no COPD)<br>N=36126 |
|--------------------------------------------------------------------------------------------------------------|-----------------------------------------------------------------------|---------------------------------------------------------------|
|                                                                                                              | Model 1<br>N=36,885                                                   | Model 1<br>N=36,065                                           |
|                                                                                                              | OR (95% CI)                                                           | OR (95% CI)                                                   |
| Falls                                                                                                        | 2.21 (1.90-2.56) ***                                                  | 1.35 (0.99-1.82) §                                            |
| Constipation                                                                                                 | 2.33 (1.93-2.81) ***                                                  | 1.62 (1.08-2.34) *                                            |
| Urinary retention                                                                                            | 2.17 (1.71-2.74) ***                                                  | 1.42 (0.82-2.29) §                                            |
| CNS Depression                                                                                               | 2.53 (2.04-3.12) ***                                                  | 1.66 (1.03-2.54) *                                            |
| Bleeding                                                                                                     | 2.86 (1.77-4.17) ***                                                  | 1.94 (0.76-4.05) §                                            |
| Renal injury                                                                                                 | 1.86 (1.19-2.79) **                                                   | 1.27 (0.45-2.80) §                                            |
| § : p>0.05 * : p<0.05, ** : p<0.01, *** : p<0.001<br>Model 1: Adjusted for age, sex and socioeconomic status |                                                                       |                                                               |

**Table S8. Odds ratios (with 95% CI) for taking 3 of more medications associated with similar ADRs in participants with painful conditions**

| ADR                                                                                                          | Self-report COPD plus painful conditions compared with painful conditions alone (no COPD)<br>N=83,992 | GOLD COPD plus painful conditions compared with painful conditions alone (no COPD)<br>N=82,388 |
|--------------------------------------------------------------------------------------------------------------|-------------------------------------------------------------------------------------------------------|------------------------------------------------------------------------------------------------|
|                                                                                                              | Model 1<br>N=83,895                                                                                   | Model 1<br>N=82,294                                                                            |
|                                                                                                              | OR (95% CI)                                                                                           | OR (95% CI)                                                                                    |
| Falls                                                                                                        | 1.99 (1.79-2.19) ***                                                                                  | 1.45 (1.19-1.75) ***                                                                           |
| Constipation                                                                                                 | 2.54 (2.21-2.91) ***                                                                                  | 1.50 (1.10-2.00) **                                                                            |
| Urinary retention                                                                                            | 2.46 (2.03-2.96) ***                                                                                  | 1.11 (0.64-1.75) §                                                                             |
| CNS Depression                                                                                               | 2.71 (2.28-3.21) ***                                                                                  | 1.40 (0.90-2.06) §                                                                             |
| Bleeding                                                                                                     | 3.50 (2.37-5.01) ***                                                                                  | 2.20 (0.86-4.54) §                                                                             |
| Renal injury                                                                                                 | 1.66 (1.30-2.09) ***                                                                                  | 1.49 (0.93-2.25) §                                                                             |
| § : p>0.05 * : p<0.05, ** : p<0.01, *** : p<0.001<br>Model 1: Adjusted for age, sex and socioeconomic status |                                                                                                       |                                                                                                |
