# Supplementary material for: Examining patterns of multimorbidity, polypharmacy and risk of adverse drug reactions in chronic obstructive pulmonary disease: a cross-sectional UK Biobank study
Source: PubMed Central journal article supplement (PMC5781016; doi:10.1136/bmjopen-2017-018404), 2018-01-14
Supplement: bmjopen-2017-018404supp004.pdf [file bmjopen-2017-018404supp004.pdf]

| Appendix 4: Specific medications in UK Biobank participants with and without COPD |                                  |                                            |                            |                            |                                 |                               |
|-----------------------------------------------------------------------------------|----------------------------------|--------------------------------------------|----------------------------|----------------------------|---------------------------------|-------------------------------|
| Medications                                                                       | Control<br>n=494323<br>count (%) | Self-report<br>COPD<br>n=8317<br>count (%) | GOLD COPD                  |                            |                                 |                               |
|                                                                                   |                                  |                                            | All<br>n=2620<br>count (%) | Mild<br>n=399<br>count (%) | Moderate<br>n=1409<br>count (%) | Severe<br>n= 812<br>count (%) |
| <b>Total number of medications</b>                                                |                                  |                                            |                            |                            |                                 |                               |
| ≥1                                                                                | 356406 (72.1)                    | 7670 (92.2)                                | 2452 (93.6)                | 352 (88.2)                 | 1321 (93.8)                     | 779 (95.9)                    |
| ≥5                                                                                | 87286 (17.7)                     | 4312 (51.8)                                | 1349 (51.5)                | 171 (42.9)                 | 702 (49.8)                      | 476 (58.6)                    |
| ≥10                                                                               | 10678 (2.2)                      | 1269 (15.3)                                | 329 (12.6)                 | 31 (7.8)                   | 172 (12.2)                      | 126 (15.5)                    |
| <b>Respiratory</b>                                                                |                                  |                                            |                            |                            |                                 |                               |
| Short acting B <sub>2</sub> agon.                                                 | 22615 (4.6)                      | 3328 (40.0)                                | 1245 (47.5)                | 123 (30.8)                 | 614 (43.6)                      | 508 (62.6)                    |
| LABA                                                                              | 9819 (2.0)                       | 2357 (28.3)                                | 905 (34.5)                 | 93 (23.3)                  | 411 (29.2)                      | 401 (49.3)                    |
| LAMA                                                                              | 597 (0.1)                        | 1345 (16.2)                                | 581 (22.2)                 | 33 (8.3)                   | 265 (18.8)                      | 283 (34.9)                    |
| ICS                                                                               | 15309 (3.1)                      | 2638 (31.7)                                | 962 (36.7)                 | 98 (24.6)                  | 471 (33.4)                      | 393 (48.4)                    |
| LABA+ICS                                                                          | 7259 (1.5)                       | 1842 (22.1)                                | 699 (26.7)                 | 67 (16.8)                  | 313 (22.2)                      | 319 (39.3)                    |
| Prednisolone                                                                      | 3127 (0.6)                       | 280 (3.4)                                  | 82 (3.1)                   | 12 (3.0)                   | 27 (1.9)                        | 43 (5.3)                      |
| Mucolytic                                                                         | 174 (0.04)                       | 187 (2.2)                                  | 49 (1.9)                   | 1 (0.3)                    | 10 (0.7)                        | 38 (4.7)                      |
| <b>Cardiovascular</b>                                                             |                                  |                                            |                            |                            |                                 |                               |
| Antiplatelet                                                                      | 21817 (4.4)                      | 894 (10.7)                                 | 268 (10.2)                 | 31 (7.8)                   | 158 (11.2)                      | 79 (9.7)                      |
| ACE-inhibitor                                                                     | 44991 (9.1)                      | 1276 (15.3)                                | 367 (14.0)                 | 33 (8.3)                   | 198 (14.1)                      | 136 (16.7)                    |
| ARB                                                                               | 17911 (3.6)                      | 565 (6.8)                                  | 159 (6.1)                  | 17 (4.3)                   | 83 (5.9)                        | 59 (7.2)                      |
| Calcium CB                                                                        | 14317 (2.9)                      | 627 (7.5)                                  | 196 (7.5)                  | 23 (5.8)                   | 106 (7.5)                       | 67 (8.3)                      |
| Statin                                                                            | 73439 (14.9)                     | 2278 (27.4)                                | 707 (27.0)                 | 72 (18.0)                  | 395 (28.0)                      | 240 (29.6)                    |
| GTN                                                                               | 4425 (0.9)                       | 373 (4.5)                                  | 110 (4.2)                  | 8 (2.0)                    | 70 (5.0)                        | 32 (3.9)                      |
| ISMN                                                                              | 2814 (0.6)                       | 244 (2.9)                                  | 68 (2.6)                   | 5 (1.3)                    | 42 (3.0)                        | 21 (2.6)                      |
| Loop diuretic                                                                     | 4836 (1.0)                       | 415 (5.0)                                  | 107 (4.1)                  | 10 (2.5)                   | 51 (3.6)                        | 46 (5.7)                      |
| Thiazide                                                                          | 21961 (4.4)                      | 637 (7.7)                                  | 196 (7.5)                  | 22 (5.5)                   | 108 (7.7)                       | 66 (8.1)                      |
| Warfarin                                                                          | 4934 (1.0)                       | 238 (2.9)                                  | 67 (2.6)                   | 6 (1.5)                    | 33 (2.3)                        | 28 (3.4)                      |
| <b>Diabetes</b>                                                                   |                                  |                                            |                            |                            |                                 |                               |
| Insulin                                                                           | 4643 (0.9)                       | 161 (1.9)                                  | 35 (1.3)                   | 2 (0.5)                    | 23 (1.6)                        | 3 (0.4)                       |
| Metformin                                                                         | 13754 (2.8)                      | 448 (5.4)                                  | 102 (3.9)                  | 7 (1.8)                    | 57 (4.0)                        | 38 (4.7)                      |
| Sulphonylurea                                                                     | 4901 (1.0)                       | 158 (1.9)                                  | 35 (1.3)                   | 2 (0.5)                    | 17 (1.2)                        | 16 (2.0)                      |
| Thiazolidindione                                                                  | 2212 (0.4)                       | 60 (0.7)                                   | 17 (0.6)                   | 1 (0.3)                    | 10 (0.7)                        | 6 (0.7)                       |
| <b>Gastrointestinal</b>                                                           |                                  |                                            |                            |                            |                                 |                               |
| PPI                                                                               | 42012 (8.5)                      | 1989 (23.9)                                | 522 (19.9)                 | 79 (19.8)                  | 286 (20.3)                      | 157 (19.3)                    |
| Antacid                                                                           | 2435 (0.5)                       | 146 (1.8)                                  | 25 (1.0)                   | 7 (1.8)                    | 10 (0.7)                        | 8 (1.0)                       |
| H <sub>2</sub> RA.                                                                | 7772 (1.6)                       | 325 (3.9)                                  | 89 (3.4)                   | 15 (3.8)                   | 53 (3.8)                        | 21 (2.6)                      |
| Laxative                                                                          | 5787 (1.8)                       | 317 (3.8)                                  | 81 (3.1)                   | 11 (2.8)                   | 40 (2.8)                        | 30 (3.7)                      |
| <b>Pain</b>                                                                       |                                  |                                            |                            |                            |                                 |                               |
| Paracetamol                                                                       | 82376 (16.7)                     | 2752 (33.1)                                | 790 (30.2)                 | 111 (27.8)                 | 446 (31.6)                      | 233 (28.7)                    |
| NSAID                                                                             | 45909 (9.3)                      | 1149 (13.8)                                | 319 (12.2)                 | 50 (12.5)                  | 175 (12.4)                      | 94 (11.6)                     |
| Weak opiate                                                                       | 18736 (3.8)                      | 1209 (14.5)                                | 336 (12.8)                 | 48 (12.0)                  | 191 (13.6)                      | 97 (11.9)                     |
| Strong opiate                                                                     | 1071 (0.2)                       | 106 (1.8)                                  | 32 (1.2)                   | 5 (1.3)                    | 16 (1.1)                        | 11 (1.4)                      |
| <b>Mental health</b>                                                              |                                  |                                            |                            |                            |                                 |                               |
| SSRI+related                                                                      | 15394 (3.1)                      | 747 (9.0)                                  | 175 (6.7)                  | 31 (7.8)                   | 100 (7.1)                       | 44 (5.4)                      |
| Tricyclic                                                                         | 4229 (0.9)                       | 206 (2.5)                                  | 49 (1.9)                   | 11 (2.8)                   | 25 (1.8)                        | 13 (1.6)                      |
| Antipsychotic                                                                     | 2237 (0.5)                       | 107 (1.3)                                  | 30 (1.1)                   | 5 (1.3)                    | 16 (1.1)                        | 9 (1.1)                       |
| Benzodiazepine                                                                    | 2316 (0.5)                       | 182 (2.2)                                  | 47 (1.8)                   | 6 (1.5)                    | 28 (2.0)                        | 13 (1.6)                      |
| <b>Metabolic</b>                                                                  |                                  |                                            |                            |                            |                                 |                               |
| Thyroxine                                                                         | 20980 (4.2)                      | 560 (6.7)                                  | 150 (5.7)                  | 27 (6.8)                   | 92 (6.5)                        | 31 (3.8)                      |
| Bisphosphonate                                                                    | 3655 (0.7)                       | 189 (2.3)                                  | 66 (2.5)                   | 15 (3.8)                   | 32 (2.3)                        | 19 (2.3)                      |
